# Supplementary material for: Sociogenomics of Cooperation and Conflict during Colony Founding in the Fire Ant Solenopsis invicta
Source: PLoS Genet. 2013 Aug 8;9(8):e1003633. doi: 10.1371/journal.pgen.1003633 (PMC3738511; doi:10.1371/journal.pgen.1003633)
Supplement: Table S2 — Experiment 1: significantly enriched GO terms and KEGG pathways (Functional Annotation Chart, P<0.05). (XLSX) [file pgen.1003633.s009.xlsx]

## Sheet: Supp Tbl 2
Experiment 1: significantly enriched GO terms and KEGG pathways (Functional Annotation Chart, P<0.05)
KEGG_PATHWAY	Biological_function	Genes	PValue	flybase	Benjamini
dme04120	Ubiquitin mediated proteolysis	43	0.00200164	FBGN0029996, FBGN0025781, FBGN0032467, FBGN0030674, FBGN0039632, FBGN0034989, FBGN0025638, FBGN0020224, FBGN0031107, FBGN0003612, FBGN0027609, FBGN0041147, FBGN0027936, FBGN0034109, FBGN0029006, FBGN0026316, FBGN0039875, FBGN0041100, FBGN0035136, FBGN0259174, FBGN0037236, FBGN0000173, FBGN0034231, FBGN0023423, FBGN0044020, FBGN0003410, FBGN0023528, FBGN0002791, FBGN0038515, FBGN0261268, FBGN00291…	0.204207
dme00970	Aminoacyl-tRNA biosynthesis	20	0.00798971	FBGN0051739, FBGN0034401, FBGN0035064, FBGN0010803, FBGN0036569, FBGN0039175, FBGN0027090, FBGN0027083, FBGN0002069, FBGN0027085, FBGN0030007, FBGN0027084, FBGN0053123, FBGN0027086, FBGN0027088, FBGN0036629, FBGN0028962, FBGN0027079, FBGN0036763, FBGN0027358	0.366973
dme04320	Dorso-ventral axis formation	14	0.0209337	FBGN0000210, FBGN0004872, FBGN0000256, FBGN0000221, FBGN0004638, FBGN0003475, FBGN0000146, FBGN0004647, FBGN0003079, FBGN0000097, FBGN0001965, FBGN0010269, FBGN0001404, FBGN0003118	0.552432
dme03018	RNA degradation	22	0.0229686	FBGN0032921, FBGN0033029, FBGN0034065, FBGN0260444, FBGN0017550, FBGN0036239, FBGN0036534, FBGN0067622, FBGN0032346, FBGN0039846, FBGN0001220, FBGN0032240, FBGN0051716, FBGN0031047, FBGN0032340, FBGN0085436, FBGN0031868, FBGN0038934, FBGN0000579, FBGN0261068, FBGN0027524, FBGN0260648, FBGN0037372	0.484305
dme04144	Endocytosis	33	0.0251199	FBGN0033349, FBGN0016693, FBGN0028582, FBGN0010389, FBGN0030894, FBGN0036546, FBGN0039402, FBGN0020224, FBGN0028741, FBGN0034789, FBGN0260798, FBGN0086785, FBGN0037299, FBGN0026192, FBGN0034744, FBGN0027605, FBGN0010341, FBGN0029006, FBGN0051158, FBGN0026179, FBGN0259174, FBGN0040206, FBGN0026479, FBGN0031450, FBGN0050372, FBGN0015790, FBGN0261064, FBGN0021814, FBGN0039924, FBGN0013750, FBGN00001…	0.440129
dme03022	Basal transcription factors	14	0.0411188	FBGN0003687, FBGN0024909, FBGN0037202, FBGN0028398, FBGN0010356, FBGN0261109, FBGN0011836, FBGN0011291, FBGN0011290, FBGN0033929, FBGN0004915, FBGN0010280, FBGN0015828, FBGN0031309	0.54967
GO_term	Biological_function	Genes	PValue	flybase	Benjamini
GO:0009987	cellular process	1488	4.94005e-46	FBgn0029504, FBgn0000046, FBgn0001179, FBgn0029502, FBgn0250876, FBgn0035945, FBgn0028665, FBgn0036546, FBgn0013343, FBgn0028662, FBgn0033179, FBgn0003435, FBgn0027783, FBgn0035558, FBgn0027784, FBgn0023508, FBgn0052626, FBgn0032698, FBgn0038601, FBgn0029789, FBgn0034697, FBgn0034410, FBgn0001168, FBgn0035954, FBgn0243513, FBgn0243516, FBgn0243514, FBgn0035956, FBgn0029906, FBgn0036534, FBgn00521…	1.54327e-42
GO:0044237	cellular metabolic process	957	1.01281e-29	FBgn0029502, FBgn0001179, FBgn0035945, FBgn0036546, FBgn0028665, FBgn0028662, FBgn0003435, FBgn0035558, FBgn0027784, FBgn0023508, FBgn0052626, FBgn0032698, FBgn0038601, FBgn0029789, FBgn0034410, FBgn0001168, FBgn0029906, FBgn0036534, FBgn0027296, FBgn0002174, FBgn0004034, FBgn0003423, FBgn0033160, FBgn0023519, FBgn0029798, FBgn0033548, FBgn0023512, FBgn0023511, FBgn0033544, FBgn0000063, FBgn00000…	1.58202e-26
GO:0016043	cellular component organization	577	4.65979e-25	FBgn0029504, FBgn0000046, FBgn0001179, FBgn0250876, FBgn0035805, FBgn0033846, FBgn0003165, FBgn0020224, FBgn0001075, FBgn0013343, FBgn0028662, FBgn0033179, FBgn0003435, FBgn0087005, FBgn0027783, FBgn0032698, FBgn0034697, FBgn0034410, FBgn0001168, FBgn0000629, FBgn0243516, FBgn0243514, FBgn0029094, FBgn0004828, FBgn0086134, FBgn0004179, FBgn0023172, FBgn0028541, FBgn0033159, FBgn0011291, FBgn00112…	4.85239e-22
GO:0034641	cellular nitrogen compound metabolic process	462	3.15902e-21	FBgn0033842, FBgn0001179, FBgn0033846, FBgn0028665, FBgn0003165, FBgn0028662, FBgn0039175, FBgn0003435, FBgn0027784, FBgn0052626, FBgn0032698, FBgn0038601, FBgn0034410, FBgn0001168, FBgn0000629, FBgn0033029, FBgn0029094, FBgn0036534, FBgn0039164, FBgn0003423, FBgn0004034, FBgn0003944, FBgn0033160, FBgn0034568, FBgn0029798, FBgn0033548, FBgn0015239, FBgn0003145, FBgn0011291, FBgn0011290, FBgn00345…	2.4672e-18
GO:0044260	cellular macromolecule metabolic process	711	4.96284e-21	FBgn0033842, FBgn0001179, FBgn0033846, FBgn0062449, FBgn0036546, FBgn0003165, FBgn0052099, FBgn0001075, FBgn0003435, FBgn0001079, FBgn0039175, FBgn0035558, FBgn0027784, FBgn0032698, FBgn0038601, FBgn0032596, FBgn0034410, FBgn0001168, FBgn0000629, FBgn0033029, FBgn0029906, FBgn0029094, FBgn0036534, FBgn0027296, FBgn0039164, FBgn0086134, FBgn0002174, FBgn0003944, FBgn0033160, FBgn0023519, FBgn00345…	3.10078e-18
GO:0006139	nucleobase, nucleoside, nucleotide and nucleic acid metabolic process	414	1.537e-18	FBgn0033842, FBgn0001179, FBgn0033846, FBgn0028665, FBgn0003165, FBgn0028662, FBgn0039175, FBgn0003435, FBgn0027784, FBgn0052626, FBgn0032698, FBgn0038601, FBgn0034410, FBgn0001168, FBgn0000629, FBgn0033029, FBgn0029094, FBgn0036534, FBgn0039164, FBgn0003944, FBgn0033160, FBgn0034568, FBgn0029798, FBgn0033548, FBgn0015239, FBgn0003145, FBgn0011291, FBgn0011290, FBgn0036569, FBgn0034572, FBgn00203…	8.00266e-16
GO:0065007	biological regulation	764	1.49278e-17	FBgn0029504, FBgn0001179, FBgn0038401, FBgn0033846, FBgn0034694, FBgn0036546, FBgn0003165, FBgn0020224, FBgn0001075, FBgn0013343, FBgn0038304, FBgn0001079, FBgn0023508, FBgn0051760, FBgn0004049, FBgn0032698, FBgn0034410, FBgn0001168, FBgn0035954, FBgn0243513, FBgn0022355, FBgn0000629, FBgn0033029, FBgn0243516, FBgn0035956, FBgn0029094, FBgn0036534, FBgn0004828, FBgn0003944, FBgn0034568, FBgn00527…	6.66208e-15
GO:0008104	protein localization	164	4.98127e-17	FBgn0038808, FBgn0013749, FBgn0000346, FBgn0066101, FBgn0039402, FBgn0259791, FBgn0013343, FBgn0026207, FBgn0041161, FBgn0027605, FBgn0083968, FBgn0041789, FBgn0031090, FBgn0029789, FBgn0003371, FBgn0030669, FBgn0024227, FBgn0020497, FBgn0001263, FBgn0011823, FBgn0035165, FBgn0013756, FBgn0000146, FBgn0052113, FBgn0026369, FBgn0014877, FBgn0015925, FBgn0011232, FBgn0031882, FBgn0013750, FBgn00003…	1.94518e-14
GO:0033036	macromolecule localization	198	1.00407e-15	FBgn0038808, FBgn0013749, FBgn0000346, FBgn0013343, FBgn0041161, FBgn0029789, FBgn0030669, FBgn0013756, FBgn0052113, FBgn0014877, FBgn0013750, FBgn0031882, FBgn0000330, FBgn0036805, FBgn0030089, FBgn0031534, FBgn0031537, FBgn0027103, FBgn0011692, FBgn0027932, FBgn0010215, FBgn0033052, FBgn0051232, FBgn0033812, FBgn0001316, FBgn0015754, FBgn0004574, FBgn0026252, FBgn0036184, FBgn0027508, FBgn00344…	3.46834e-13
GO:0006807	nitrogen compound metabolic process	483	1.85781e-15	FBgn0033842, FBgn0001179, FBgn0033846, FBgn0028665, FBgn0003165, FBgn0028662, FBgn0039175, FBgn0003435, FBgn0027784, FBgn0052626, FBgn0032698, FBgn0038601, FBgn0034410, FBgn0001168, FBgn0000629, FBgn0033029, FBgn0029094, FBgn0036534, FBgn0039164, FBgn0003423, FBgn0004034, FBgn0003944, FBgn0033160, FBgn0034568, FBgn0029798, FBgn0033548, FBgn0015239, FBgn0003145, FBgn0011291, FBgn0011290, FBgn00345…	5.89639e-13
GO:0050789	regulation of biological process	695	4.19939e-15	FBgn0029504, FBgn0001179, FBgn0038401, FBgn0033846, FBgn0034694, FBgn0036546, FBgn0003165, FBgn0020224, FBgn0001075, FBgn0013343, FBgn0038304, FBgn0001079, FBgn0023508, FBgn0051760, FBgn0032698, FBgn0034410, FBgn0001168, FBgn0035954, FBgn0243513, FBgn0000629, FBgn0033029, FBgn0243516, FBgn0035956, FBgn0029094, FBgn0036534, FBgn0004828, FBgn0003944, FBgn0034568, FBgn0052758, FBgn0029798, FBgn00231…	1.19815e-12
GO:0016070	RNA metabolic process	202	1.09972e-14	FBgn0033842, FBgn0001179, FBgn0022936, FBgn0035692, FBgn0003165, FBgn0010803, FBgn0003435, FBgn0039175, FBgn0010300, FBgn0027784, FBgn0030660, FBgn0038903, FBgn0037255, FBgn0037540, FBgn0034703, FBgn0032296, FBgn0004556, FBgn0036534, FBgn0022942, FBgn0051390, FBgn0033160, FBgn0033548, FBgn0032016, FBgn0011291, FBgn0011290, FBgn0036569, FBgn0034572, FBgn0259937, FBgn0031238, FBgn0010422, FBgn00300…	2.86138e-12
GO:0006996	organelle organization	321	2.07127e-14	FBgn0038808, FBgn0031696, FBgn0000046, FBgn0035805, FBgn0000346, FBgn0025682, FBgn0035692, FBgn0003165, FBgn0010803, FBgn0028662, FBgn0013343, FBgn0033179, FBgn0027783, FBgn0041161, FBgn0010303, FBgn0032698, FBgn0034697, FBgn0034410, FBgn0031005, FBgn0030669, FBgn0259108, FBgn0000629, FBgn0037249, FBgn0243516, FBgn0013756, FBgn0029094, FBgn0004828, FBgn0086134, FBgn0041174, FBgn0014877, FBgn00148…	4.98912e-12
GO:0016192	vesicle-mediated transport	157	2.98524e-14	FBgn0029504, FBgn0013749, FBgn0013746, FBgn0036194, FBgn0000346, FBgn0066101, FBgn0036875, FBgn0013343, FBgn0029088, FBgn0036211, FBgn0087005, FBgn0010300, FBgn0083963, FBgn0027605, FBgn0038049, FBgn0031090, FBgn0028471, FBgn0042085, FBgn0034155, FBgn0051064, FBgn0243513, FBgn0013759, FBgn0044323, FBgn0035060, FBgn0243514, FBgn0011236, FBgn0052113, FBgn0039212, FBgn0011232, FBgn0013750, FBgn00041…	6.66411e-12
GO:0050794	regulation of cellular process	646	1.08123e-13	FBgn0029504, FBgn0001179, FBgn0038401, FBgn0033846, FBgn0034694, FBgn0036546, FBgn0003165, FBgn0020224, FBgn0001075, FBgn0013343, FBgn0038304, FBgn0001079, FBgn0023508, FBgn0051760, FBgn0032698, FBgn0034410, FBgn0001168, FBgn0243513, FBgn0035954, FBgn0000629, FBgn0033029, FBgn0243516, FBgn0035956, FBgn0029094, FBgn0004828, FBgn0003944, FBgn0034568, FBgn0052758, FBgn0029798, FBgn0023172, FBgn00011…	2.25211e-11
GO:0051641	cellular localization	196	1.6116e-13	FBgn0038808, FBgn0013749, FBgn0000346, FBgn0013343, FBgn0029088, FBgn0041161, FBgn0022160, FBgn0029789, FBgn0031359, FBgn0034155, FBgn0030669, FBgn0259108, FBgn0013759, FBgn0013756, FBgn0014877, FBgn0259246, FBgn0013750, FBgn0004179, FBgn0000330, FBgn0030089, FBgn0000063, FBgn0004583, FBgn0030500, FBgn0031534, FBgn0031537, FBgn0027103, FBgn0011692, FBgn0010215, FBgn0033052, FBgn0023527, FBgn00512…	3.14752e-11
GO:0051179	localization	513	6.28093e-13	FBgn0029504, FBgn0033846, FBgn0028665, FBgn0003165, FBgn0020224, FBgn0028662, FBgn0013343, FBgn0029088, FBgn0087005, FBgn0029090, FBgn0029789, FBgn0033558, FBgn0038407, FBgn0017482, FBgn0243513, FBgn0022355, FBgn0243514, FBgn0003429, FBgn0052113, FBgn0033443, FBgn0004179, FBgn0000036, FBgn0000063, FBgn0028541, FBgn0035432, FBgn0015239, FBgn0033159, FBgn0039081, FBgn0052103, FBgn0035113, FBgn00354…	1.15414e-10
GO:0065008	regulation of biological quality	210	3.35823e-12	FBgn0013749, FBgn0013746, FBgn0000346, FBgn0003165, FBgn0013343, FBgn0001079, FBgn0037647, FBgn0004049, FBgn0002413, FBgn0010303, FBgn0031693, FBgn0031005, FBgn0022355, FBgn0259108, FBgn0013759, FBgn0000629, FBgn0243516, FBgn0032048, FBgn0004828, FBgn0259246, FBgn0013750, FBgn0004179, FBgn0023172, FBgn0000330, FBgn0023179, FBgn0030092, FBgn0030089, FBgn0027515, FBgn0033159, FBgn0039081, FBgn00315…	5.82835e-10
GO:0051649	establishment of localization in cell	165	4.68404e-12	FBgn0038808, FBgn0013749, FBgn0040232, FBgn0000346, FBgn0013343, FBgn0026207, FBgn0029088, FBgn0022160, FBgn0027605, FBgn0002525, FBgn0083968, FBgn0029789, FBgn0031359, FBgn0034155, FBgn0030669, FBgn0033378, FBgn0259108, FBgn0020497, FBgn0013759, FBgn0035060, FBgn0011823, FBgn0035165, FBgn0013756, FBgn0003654, FBgn0014877, FBgn0039212, FBgn0259246, FBgn0011232, FBgn0013750, FBgn0004179, FBgn00003…	7.70153e-10
GO:0043933	macromolecular complex subunit organization	115	2.96914e-11	FBgn0001179, FBgn0022936, FBgn0035805, FBgn0000346, FBgn0011836, FBgn0031868, FBgn0032195, FBgn0051961, FBgn0260639, FBgn0010280, FBgn0037540, FBgn0029117, FBgn0020497, FBgn0038578, FBgn0011823, FBgn0035754, FBgn0016687, FBgn0029094, FBgn0000146, FBgn0004828, FBgn0016685, FBgn0039213, FBgn0014879, FBgn0051390, FBgn0038371, FBgn0039626, FBgn0004179, FBgn0031873, FBgn0005617, FBgn0015828, FBgn00275…	4.63781e-09
GO:0045184	establishment of protein localization	116	3.64538e-11	FBgn0038808, FBgn0013749, FBgn0000346, FBgn0066101, FBgn0039402, FBgn0026207, FBgn0013343, FBgn0027605, FBgn0083968, FBgn0029789, FBgn0031090, FBgn0030669, FBgn0020497, FBgn0011823, FBgn0013756, FBgn0035165, FBgn0014877, FBgn0011232, FBgn0013750, FBgn0031882, FBgn0000330, FBgn0053547, FBgn0032397, FBgn0036805, FBgn0000257, FBgn0030089, FBgn0024921, FBgn0031534, FBgn0031537, FBgn0014411, FBgn00271…	5.42294e-09
GO:0015031	protein transport	113	7.42753e-11	FBgn0038808, FBgn0013749, FBgn0000346, FBgn0066101, FBgn0039402, FBgn0026207, FBgn0013343, FBgn0027605, FBgn0083968, FBgn0029789, FBgn0031090, FBgn0030669, FBgn0020497, FBgn0011823, FBgn0013756, FBgn0035165, FBgn0014877, FBgn0011232, FBgn0013750, FBgn0031882, FBgn0000330, FBgn0053547, FBgn0032397, FBgn0036805, FBgn0000257, FBgn0030089, FBgn0024921, FBgn0031534, FBgn0031537, FBgn0014411, FBgn00271…	1.05471e-08
GO:0016044	membrane organization	125	1.14908e-10	FBgn0029504, FBgn0013749, FBgn0013746, FBgn0261276, FBgn0036194, FBgn0000346, FBgn0066101, FBgn0036875, FBgn0013343, FBgn0033179, FBgn0036211, FBgn0087005, FBgn0010300, FBgn0083963, FBgn0027605, FBgn0038049, FBgn0002525, FBgn0083968, FBgn0031090, FBgn0028471, FBgn0042085, FBgn0051064, FBgn0001168, FBgn0044323, FBgn0035060, FBgn0243514, FBgn0011236, FBgn0039213, FBgn0013750, FBgn0004179, FBgn00003…	1.56074e-08
GO:0051234	establishment of localization	430	2.87806e-10	FBgn0029504, FBgn0028665, FBgn0028662, FBgn0013343, FBgn0029088, FBgn0087005, FBgn0029090, FBgn0029789, FBgn0033558, FBgn0017482, FBgn0038407, FBgn0243513, FBgn0022355, FBgn0243514, FBgn0003429, FBgn0052113, FBgn0033443, FBgn0004179, FBgn0000036, FBgn0000063, FBgn0028541, FBgn0035432, FBgn0015239, FBgn0033159, FBgn0039081, FBgn0052103, FBgn0035113, FBgn0035435, FBgn0029761, FBgn0033052, FBgn00020…	3.74627e-08
GO:0006897	endocytosis	105	3.47405e-10	FBgn0029504, FBgn0013749, FBgn0013746, FBgn0036194, FBgn0000346, FBgn0066101, FBgn0036875, FBgn0036211, FBgn0087005, FBgn0010300, FBgn0083963, FBgn0027605, FBgn0038049, FBgn0031090, FBgn0028471, FBgn0042085, FBgn0051064, FBgn0044323, FBgn0035060, FBgn0243514, FBgn0011236, FBgn0013750, FBgn0004179, FBgn0000330, FBgn0000242, FBgn0030089, FBgn0028541, FBgn0015024, FBgn0024921, FBgn0027594, FBgn00331…	4.34118e-08
GO:0010324	membrane invagination	105	3.47405e-10	FBgn0029504, FBgn0013749, FBgn0013746, FBgn0036194, FBgn0000346, FBgn0066101, FBgn0036875, FBgn0036211, FBgn0087005, FBgn0010300, FBgn0083963, FBgn0027605, FBgn0038049, FBgn0031090, FBgn0028471, FBgn0042085, FBgn0051064, FBgn0044323, FBgn0035060, FBgn0243514, FBgn0011236, FBgn0013750, FBgn0004179, FBgn0000330, FBgn0000242, FBgn0030089, FBgn0028541, FBgn0015024, FBgn0024921, FBgn0027594, FBgn00331…	4.34118e-08
GO:0019222	regulation of metabolic process	364	5.61142e-10	FBgn0038808, FBgn0029504, FBgn0013746, FBgn0001179, FBgn0004567, FBgn0033846, FBgn0025682, FBgn0032940, FBgn0034012, FBgn0036199, FBgn0003165, FBgn0020224, FBgn0000448, FBgn0042696, FBgn0001079, FBgn0010300, FBgn0037445, FBgn0010303, FBgn0032698, FBgn0038903, FBgn0034410, FBgn0037540, FBgn0001168, FBgn0035954, FBgn0000629, FBgn0037249, FBgn0033029, FBgn0013753, FBgn0035956, FBgn0029094, FBgn00229…	6.74234e-08
GO:0046907	intracellular transport	121	6.36522e-10	FBgn0038808, FBgn0013749, FBgn0000346, FBgn0013343, FBgn0026207, FBgn0027605, FBgn0022160, FBgn0083968, FBgn0029789, FBgn0031359, FBgn0034155, FBgn0030669, FBgn0033378, FBgn0259108, FBgn0020497, FBgn0011823, FBgn0035165, FBgn0013756, FBgn0003654, FBgn0014877, FBgn0011232, FBgn0013750, FBgn0000330, FBgn0053547, FBgn0004363, FBgn0032397, FBgn0000257, FBgn0030089, FBgn0004583, FBgn0024921, FBgn00315…	7.36479e-08
GO:0044085	cellular component biogenesis	203	7.09946e-10	FBgn0001179, FBgn0022936, FBgn0035805, FBgn0033846, FBgn0000346, FBgn0041161, FBgn0032195, FBgn0010303, FBgn0037540, FBgn0004556, FBgn0013756, FBgn0029094, FBgn0004828, FBgn0014879, FBgn0051390, FBgn0033548, FBgn0011291, FBgn0011290, FBgn0024273, FBgn0259937, FBgn0011692, FBgn0035113, FBgn0004167, FBgn0036964, FBgn0023527, FBgn0033812, FBgn0015754, FBgn0004574, FBgn0026252, FBgn0028398, FBgn00035…	7.92096e-08
GO:0044238	primary metabolic process	983	9.95616e-10	FBgn0029502, FBgn0001179, FBgn0036546, FBgn0028665, FBgn0028662, FBgn0003435, FBgn0035558, FBgn0027784, FBgn0052626, FBgn0032698, FBgn0038601, FBgn0029789, FBgn0034410, FBgn0001168, FBgn0029906, FBgn0036534, FBgn0027296, FBgn0002174, FBgn0029791, FBgn0004034, FBgn0003423, FBgn0033160, FBgn0023519, FBgn0029798, FBgn0033548, FBgn0023512, FBgn0023511, FBgn0033544, FBgn0000063, FBgn0000064, FBgn00523…	1.07252e-07
GO:0060255	regulation of macromolecule metabolic process	337	1.06129e-09	FBgn0038808, FBgn0029504, FBgn0013746, FBgn0001179, FBgn0004567, FBgn0033846, FBgn0025682, FBgn0032940, FBgn0034012, FBgn0003165, FBgn0000448, FBgn0042696, FBgn0001079, FBgn0010300, FBgn0037445, FBgn0010303, FBgn0032698, FBgn0038903, FBgn0034410, FBgn0037540, FBgn0001168, FBgn0035954, FBgn0000629, FBgn0037249, FBgn0033029, FBgn0013753, FBgn0035956, FBgn0029094, FBgn0022942, FBgn0036534, FBgn00004…	1.10515e-07
GO:0044249	cellular biosynthetic process	449	1.77061e-09	FBgn0029502, FBgn0001179, FBgn0033846, FBgn0028665, FBgn0028662, FBgn0039175, FBgn0035558, FBgn0052626, FBgn0032698, FBgn0038601, FBgn0034410, FBgn0001168, FBgn0000629, FBgn0033029, FBgn0029906, FBgn0029094, FBgn0027296, FBgn0003423, FBgn0004034, FBgn0003944, FBgn0039360, FBgn0023519, FBgn0034568, FBgn0023512, FBgn0015239, FBgn0052380, FBgn0003145, FBgn0011291, FBgn0011290, FBgn0036569, FBgn00203…	1.78432e-07
GO:0065003	macromolecular complex assembly	99	2.39297e-09	FBgn0001179, FBgn0022936, FBgn0035805, FBgn0000346, FBgn0011836, FBgn0032195, FBgn0051961, FBgn0010280, FBgn0260639, FBgn0037540, FBgn0029117, FBgn0020497, FBgn0038578, FBgn0011823, FBgn0035754, FBgn0029094, FBgn0000146, FBgn0004828, FBgn0051390, FBgn0014879, FBgn0039213, FBgn0038371, FBgn0039626, FBgn0031873, FBgn0005617, FBgn0015828, FBgn0027592, FBgn0024921, FBgn0011291, FBgn0053808, FBgn00112…	2.33614e-07
GO:0009058	biosynthetic process	461	3.00191e-09	FBgn0029502, FBgn0001179, FBgn0033846, FBgn0028665, FBgn0052099, FBgn0028662, FBgn0039175, FBgn0035558, FBgn0052626, FBgn0032698, FBgn0038601, FBgn0034410, FBgn0001168, FBgn0000629, FBgn0033029, FBgn0029906, FBgn0029094, FBgn0027296, FBgn0003423, FBgn0004034, FBgn0003944, FBgn0023519, FBgn0039360, FBgn0034568, FBgn0023512, FBgn0015239, FBgn0052380, FBgn0003145, FBgn0011291, FBgn0011290, FBgn00365…	2.84181e-07
GO:0006810	transport	412	3.36979e-09	FBgn0029504, FBgn0028665, FBgn0028662, FBgn0013343, FBgn0029088, FBgn0087005, FBgn0029090, FBgn0029789, FBgn0033558, FBgn0017482, FBgn0038407, FBgn0243513, FBgn0022355, FBgn0243514, FBgn0003429, FBgn0052113, FBgn0033443, FBgn0004179, FBgn0000036, FBgn0028541, FBgn0035432, FBgn0015239, FBgn0033159, FBgn0039081, FBgn0052103, FBgn0035113, FBgn0035435, FBgn0029761, FBgn0033052, FBgn0002022, FBgn00386…	3.09625e-07
GO:0007010	cytoskeleton organization	162	5.54723e-09	FBgn0031696, FBgn0002914, FBgn0000046, FBgn0040235, FBgn0040232, FBgn0035692, FBgn0035489, FBgn0039731, FBgn0028662, FBgn0027783, FBgn0039206, FBgn0041161, FBgn0027605, FBgn0041789, FBgn0010303, FBgn0036314, FBgn0035347, FBgn0033378, FBgn0259108, FBgn0024227, FBgn0020497, FBgn0037249, FBgn0002924, FBgn0243516, FBgn0038576, FBgn0013756, FBgn0086134, FBgn0039924, FBgn0003654, FBgn0041174, FBgn00392…	4.95129e-07
GO:0080090	regulation of primary metabolic process	321	8.60507e-09	FBgn0038808, FBgn0029504, FBgn0013746, FBgn0001179, FBgn0004567, FBgn0033846, FBgn0032940, FBgn0034012, FBgn0003165, FBgn0000448, FBgn0042696, FBgn0001079, FBgn0010300, FBgn0037445, FBgn0010303, FBgn0032698, FBgn0038903, FBgn0034410, FBgn0037540, FBgn0001168, FBgn0035954, FBgn0000629, FBgn0037249, FBgn0033029, FBgn0013753, FBgn0035956, FBgn0029094, FBgn0000439, FBgn0005410, FBgn0010109, FBgn00373…	7.46729e-07
GO:0008152	metabolic process	1171	1.32116e-08	FBgn0029502, FBgn0001179, FBgn0035945, FBgn0036546, FBgn0028665, FBgn0028662, FBgn0003435, FBgn0035558, FBgn0027784, FBgn0023508, FBgn0052626, FBgn0032698, FBgn0038601, FBgn0029789, FBgn0034410, FBgn0001168, FBgn0029906, FBgn0003429, FBgn0036534, FBgn0027296, FBgn0002174, FBgn0029791, FBgn0003423, FBgn0004034, FBgn0033160, FBgn0023519, FBgn0029798, FBgn0033548, FBgn0023512, FBgn0023511, FBgn00335…	1.11549e-06
GO:0051128	regulation of cellular component organization	105	4.08405e-08	FBgn0031696, FBgn0002914, FBgn0010389, FBgn0040230, FBgn0003165, FBgn0011836, FBgn0013343, FBgn0041161, FBgn0010382, FBgn0033378, FBgn0259108, FBgn0002791, FBgn0013759, FBgn0243516, FBgn0035060, FBgn0002921, FBgn0000146, FBgn0004828, FBgn0039924, FBgn0023172, FBgn0000063, FBgn0014006, FBgn0027515, FBgn0001250, FBgn0020388, FBgn0000117, FBgn0086899, FBgn0024277, FBgn0259678, FBgn0024273, FBgn02610…	3.35751e-06
GO:0006461	protein complex assembly	71	4.39445e-08	FBgn0031454, FBgn0003887, FBgn0001179, FBgn0024909, FBgn0003687, FBgn0022936, FBgn0035805, FBgn0000346, FBgn0031456, FBgn0038294, FBgn0011836, FBgn0032195, FBgn0010341, FBgn0051961, FBgn0036581, FBgn0010280, FBgn0260639, FBgn0003884, FBgn0031450, FBgn0001337, FBgn0020497, FBgn0029117, FBgn0037202, FBgn0038578, FBgn0011823, FBgn0035754, FBgn0032154, FBgn0033929, FBgn0051390, FBgn0039213, FBgn00421…	3.52006e-06
GO:0070271	protein complex biogenesis	71	4.39445e-08	FBgn0031454, FBgn0003887, FBgn0001179, FBgn0024909, FBgn0003687, FBgn0022936, FBgn0035805, FBgn0000346, FBgn0031456, FBgn0038294, FBgn0011836, FBgn0032195, FBgn0010341, FBgn0051961, FBgn0036581, FBgn0010280, FBgn0260639, FBgn0003884, FBgn0031450, FBgn0001337, FBgn0020497, FBgn0029117, FBgn0037202, FBgn0038578, FBgn0011823, FBgn0035754, FBgn0032154, FBgn0033929, FBgn0051390, FBgn0039213, FBgn00421…	3.52006e-06
GO:0031323	regulation of cellular metabolic process	322	4.44622e-08	FBgn0038808, FBgn0029504, FBgn0013746, FBgn0001179, FBgn0004567, FBgn0033846, FBgn0032940, FBgn0034012, FBgn0003165, FBgn0020224, FBgn0000448, FBgn0042696, FBgn0001079, FBgn0010300, FBgn0037445, FBgn0010303, FBgn0032698, FBgn0038903, FBgn0034410, FBgn0037540, FBgn0001168, FBgn0035954, FBgn0000629, FBgn0037249, FBgn0033029, FBgn0013753, FBgn0035956, FBgn0029094, FBgn0000439, FBgn0005410, FBgn00101…	3.4725e-06
GO:0043412	biopolymer modification	222	5.61622e-08	FBgn0031696, FBgn0013749, FBgn0037743, FBgn0051108, FBgn0062449, FBgn0034989, FBgn0036546, FBgn0052099, FBgn0001075, FBgn0026147, FBgn0001079, FBgn0035558, FBgn0002413, FBgn0010303, FBgn0260935, FBgn0034410, FBgn0034703, FBgn0013759, FBgn0000629, FBgn0029906, FBgn0027296, FBgn0041174, FBgn0034568, FBgn0013750, FBgn0260945, FBgn0033021, FBgn0033544, FBgn0000063, FBgn0261112, FBgn0027515, FBgn00388…	4.27928e-06
GO:0022607	cellular component assembly	178	6.51013e-08	FBgn0002914, FBgn0001179, FBgn0035805, FBgn0022936, FBgn0033846, FBgn0000346, FBgn0011836, FBgn0041161, FBgn0032195, FBgn0010303, FBgn0051961, FBgn0260639, FBgn0010280, FBgn0010382, FBgn0010894, FBgn0037540, FBgn0003371, FBgn0033378, FBgn0020497, FBgn0029117, FBgn0002924, FBgn0038578, FBgn0011823, FBgn0002921, FBgn0013756, FBgn0035754, FBgn0029094, FBgn0004828, FBgn0000146, FBgn0002926, FBgn00166…	4.84228e-06
GO:0050793	regulation of developmental process	114	9.86477e-08	FBgn0041604, FBgn0010389, FBgn0003165, FBgn0001075, FBgn0013343, FBgn0000448, FBgn0027609, FBgn0002526, FBgn0041161, FBgn0010300, FBgn0010303, FBgn0010382, FBgn0003371, FBgn0031005, FBgn0033378, FBgn0259108, FBgn0002791, FBgn0013759, FBgn0243516, FBgn0035060, FBgn0002921, FBgn0004828, FBgn0000146, FBgn0039924, FBgn0014388, FBgn0003944, FBgn0000568, FBgn0023172, FBgn0004583, FBgn0014006, FBgn00275…	7.16685e-06
GO:0034660	ncRNA metabolic process	59	1.22496e-07	FBgn0033842, FBgn0010803, FBgn0029148, FBgn0039175, FBgn0010300, FBgn0030660, FBgn0038737, FBgn0034703, FBgn0051739, FBgn0004556, FBgn0043799, FBgn0036462, FBgn0011824, FBgn0038576, FBgn0035064, FBgn0036266, FBgn0037708, FBgn0027090, FBgn0027083, FBgn0083976, FBgn0027085, FBgn0027084, FBgn0034735, FBgn0027086, FBgn0029714, FBgn0027088, FBgn0028481, FBgn0033548, FBgn0039627, FBgn0036000, FBgn00391…	8.69721e-06
GO:0007154	cell communication	95	2.15832e-07	FBgn0031454, FBgn0052056, FBgn0013749, FBgn0038588, FBgn0034366, FBgn0000346, FBgn0040230, FBgn0039132, FBgn0005586, FBgn0003165, FBgn0013343, FBgn0000303, FBgn0016672, FBgn0040475, FBgn0002413, FBgn0039774, FBgn0000479, FBgn0000173, FBgn0031450, FBgn0086384, FBgn0002791, FBgn0259108, FBgn0013759, FBgn0032005, FBgn0001624, FBgn0035060, FBgn0013717, FBgn0014018, FBgn0001125, FBgn0033996, FBgn00399…	1.49834e-05
GO:0006350	transcription	154	2.2125e-07	FBgn0002914, FBgn0001179, FBgn0004567, FBgn0022936, FBgn0033846, FBgn0038872, FBgn0001276, FBgn0034012, FBgn0011836, FBgn0000448, FBgn0042696, FBgn0024491, FBgn0038046, FBgn0010300, FBgn0031868, FBgn0002522, FBgn0038601, FBgn0038903, FBgn0010280, FBgn0034410, FBgn0037540, FBgn0001168, FBgn0000629, FBgn0033029, FBgn0038578, FBgn0014018, FBgn0015014, FBgn0038576, FBgn0004896, FBgn0035754, FBgn00166…	1.50257e-05
GO:0034621	cellular macromolecular complex subunit organization	80	2.74518e-07	FBgn0031454, FBgn0003887, FBgn0032261, FBgn0003687, FBgn0035805, FBgn0000346, FBgn0031456, FBgn0038294, FBgn0017577, FBgn0011836, FBgn0031868, FBgn0010341, FBgn0027378, FBgn0037218, FBgn0051961, FBgn0260639, FBgn0053822, FBgn0003884, FBgn0031450, FBgn0001337, FBgn0037540, FBgn0035918, FBgn0020497, FBgn0029117, FBgn0011823, FBgn0040078, FBgn0028554, FBgn0016687, FBgn0029094, FBgn0000146, FBgn00048…	1.82465e-05
GO:0043170	macromolecule metabolic process	799	3.32972e-07	FBgn0029502, FBgn0001179, FBgn0036546, FBgn0003435, FBgn0035558, FBgn0027784, FBgn0032698, FBgn0038601, FBgn0034410, FBgn0001168, FBgn0029906, FBgn0036534, FBgn0027296, FBgn0002174, FBgn0029791, FBgn0033160, FBgn0023519, FBgn0029798, FBgn0033548, FBgn0023512, FBgn0023511, FBgn0033544, FBgn0000063, FBgn0036569, FBgn0020306, FBgn0023529, FBgn0003450, FBgn0023528, FBgn0023527, FBgn0034401, FBgn00392…	2.16707e-05
GO:0043687	post-translational protein modification	171	7.93761e-07	FBgn0031696, FBgn0029996, FBgn0013749, FBgn0010389, FBgn0010288, FBgn0038588, FBgn0035601, FBgn0062449, FBgn0036546, FBgn0052099, FBgn0001075, FBgn0001079, FBgn0027609, FBgn0002413, FBgn0029006, FBgn0010303, FBgn0031860, FBgn0260935, FBgn0031294, FBgn0034410, FBgn0003371, FBgn0259680, FBgn0024227, FBgn0013759, FBgn0024846, FBgn0000629, FBgn0029113, FBgn0039623, FBgn0011826, FBgn0032210, FBgn00308…	5.06051e-05
GO:0006259	DNA metabolic process	84	7.99108e-07	FBgn0002914, FBgn0015664, FBgn0001179, FBgn0033846, FBgn0031399, FBgn0038704, FBgn0033273, FBgn0017577, FBgn0024732, FBgn0000307, FBgn0042696, FBgn0032906, FBgn0027914, FBgn0031868, FBgn0026869, FBgn0032698, FBgn0015553, FBgn0033690, FBgn0027378, FBgn0004087, FBgn0010382, FBgn0027375, FBgn0037141, FBgn0035918, FBgn0034878, FBgn0010438, FBgn0036843, FBgn0037202, FBgn0000246, FBgn0015546, FBgn00349…	4.99271e-05
GO:0034613	cellular protein localization	71	1.0572e-06	FBgn0038808, FBgn0039132, FBgn0031456, FBgn0013343, FBgn0026207, FBgn0038947, FBgn0040475, FBgn0027605, FBgn0083968, FBgn0029789, FBgn0031450, FBgn0001337, FBgn0030669, FBgn0020497, FBgn0037702, FBgn0032005, FBgn0010638, FBgn0011823, FBgn0035165, FBgn0013756, FBgn0002566, FBgn0000482, FBgn0052654, FBgn0014877, FBgn0027360, FBgn0036974, FBgn0042177, FBgn0035995, FBgn0000330, FBgn0053547, FBgn00323…	6.47569e-05
GO:0051726	regulation of cell cycle	67	1.07582e-06	FBgn0031696, FBgn0002914, FBgn0015664, FBgn0024689, FBgn0025781, FBgn0000404, FBgn0031399, FBgn0036546, FBgn0003165, FBgn0039403, FBgn0031107, FBgn0035640, FBgn0010300, FBgn0026317, FBgn0032698, FBgn0023444, FBgn0010382, FBgn0003884, FBgn0027053, FBgn0027375, FBgn0002791, FBgn0001624, FBgn0005198, FBgn0029094, FBgn0003525, FBgn0011763, FBgn0003268, FBgn0003139, FBgn0053193, FBgn0000996, FBgn00000…	6.463e-05
GO:0051171	regulation of nitrogen compound metabolic process	266	1.13123e-06	FBgn0029504, FBgn0001179, FBgn0013746, FBgn0004567, FBgn0033846, FBgn0032940, FBgn0034012, FBgn0003165, FBgn0000448, FBgn0042696, FBgn0001079, FBgn0037445, FBgn0010303, FBgn0032698, FBgn0038903, FBgn0034410, FBgn0037540, FBgn0001168, FBgn0035954, FBgn0000629, FBgn0033029, FBgn0013753, FBgn0035956, FBgn0029094, FBgn0000439, FBgn0005410, FBgn0010109, FBgn0037344, FBgn0037657, FBgn0003944, FBgn00513…	6.66763e-05
GO:0006464	protein modification process	205	1.19122e-06	FBgn0031696, FBgn0013749, FBgn0051108, FBgn0037743, FBgn0062449, FBgn0034989, FBgn0036546, FBgn0052099, FBgn0001075, FBgn0026147, FBgn0001079, FBgn0035558, FBgn0002413, FBgn0010303, FBgn0260935, FBgn0034410, FBgn0013759, FBgn0000629, FBgn0029906, FBgn0027296, FBgn0041174, FBgn0034568, FBgn0013750, FBgn0260945, FBgn0033021, FBgn0033544, FBgn0000063, FBgn0261112, FBgn0027515, FBgn0038827, FBgn00203…	6.89117e-05
GO:0010468	regulation of gene expression	290	1.39971e-06	FBgn0038808, FBgn0029504, FBgn0001179, FBgn0013746, FBgn0004567, FBgn0033846, FBgn0025682, FBgn0032940, FBgn0034012, FBgn0003165, FBgn0000448, FBgn0042696, FBgn0001079, FBgn0010300, FBgn0037445, FBgn0010303, FBgn0038903, FBgn0034410, FBgn0037540, FBgn0001168, FBgn0035954, FBgn0000629, FBgn0037249, FBgn0033029, FBgn0013753, FBgn0035956, FBgn0029094, FBgn0022942, FBgn0036534, FBgn0000439, FBgn00054…	7.95003e-05
GO:0006909	phagocytosis	76	1.48411e-06	FBgn0029504, FBgn0026597, FBgn0013746, FBgn0036194, FBgn0000346, FBgn0028382, FBgn0036875, FBgn0036211, FBgn0087005, FBgn0032167, FBgn0026192, FBgn0010300, FBgn0083963, FBgn0011771, FBgn0027605, FBgn0038049, FBgn0010341, FBgn0025582, FBgn0031090, FBgn0028471, FBgn0042085, FBgn0033714, FBgn0012051, FBgn0051064, FBgn0044323, FBgn0039120, FBgn0032250, FBgn0243514, FBgn0005198, FBgn0011236, FBgn00045…	8.27886e-05
GO:0006886	intracellular protein transport	69	1.54553e-06	FBgn0038808, FBgn0039132, FBgn0031456, FBgn0013343, FBgn0026207, FBgn0038947, FBgn0040475, FBgn0027605, FBgn0083968, FBgn0029789, FBgn0031450, FBgn0001337, FBgn0030669, FBgn0020497, FBgn0037702, FBgn0032005, FBgn0010638, FBgn0011823, FBgn0035165, FBgn0013756, FBgn0002566, FBgn0000482, FBgn0052654, FBgn0014877, FBgn0027360, FBgn0036974, FBgn0042177, FBgn0035995, FBgn0000330, FBgn0053547, FBgn00323…	8.47021e-05
GO:0007267	cell-cell signaling	80	1.69118e-06	FBgn0031454, FBgn0052056, FBgn0013749, FBgn0000346, FBgn0040230, FBgn0039132, FBgn0005586, FBgn0003165, FBgn0013343, FBgn0000303, FBgn0016672, FBgn0039774, FBgn0000479, FBgn0031450, FBgn0086384, FBgn0259108, FBgn0002791, FBgn0013759, FBgn0001624, FBgn0035060, FBgn0001125, FBgn0039928, FBgn0040285, FBgn0259243, FBgn0039212, FBgn0053094, FBgn0259246, FBgn0013750, FBgn0004179, FBgn0000330, FBgn00011…	9.10865e-05
GO:0044265	cellular macromolecule catabolic process	84	1.86711e-06	FBgn0029996, FBgn0010288, FBgn0030674, FBgn0032467, FBgn0039632, FBgn0030809, FBgn0040230, FBgn0034989, FBgn0003165, FBgn0024732, FBgn0031107, FBgn0050421, FBgn0027914, FBgn0031868, FBgn0039025, FBgn0028476, FBgn0029006, FBgn0039875, FBgn0026316, FBgn0023444, FBgn0032596, FBgn0035136, FBgn0000173, FBgn0034410, FBgn0032296, FBgn0002791, FBgn0037707, FBgn0029113, FBgn0013717, FBgn0261268, FBgn00286…	9.88572e-05
GO:0006396	RNA processing	109	2.00247e-06	FBgn0033842, FBgn0040235, FBgn0031493, FBgn0036733, FBgn0031492, FBgn0036734, FBgn0035692, FBgn0052533, FBgn0011224, FBgn0032515, FBgn0003435, FBgn0011638, FBgn0031868, FBgn0027784, FBgn0028474, FBgn0036314, FBgn0037255, FBgn0034703, FBgn0033378, FBgn0004556, FBgn0038576, FBgn0011824, FBgn0022942, FBgn0083976, FBgn0082831, FBgn0033160, FBgn0003659, FBgn0029714, FBgn0039626, FBgn0033548, FBgn00396…	0.000104257
GO:0019219	regulation of nucleobase, nucleoside, nucleotide and nucleic acid metabolic process	264	2.00447e-06	FBgn0029504, FBgn0001179, FBgn0013746, FBgn0004567, FBgn0033846, FBgn0032940, FBgn0034012, FBgn0003165, FBgn0000448, FBgn0042696, FBgn0001079, FBgn0037445, FBgn0010303, FBgn0032698, FBgn0038903, FBgn0034410, FBgn0037540, FBgn0001168, FBgn0035954, FBgn0000629, FBgn0033029, FBgn0013753, FBgn0035956, FBgn0029094, FBgn0000439, FBgn0005410, FBgn0010109, FBgn0037344, FBgn0037657, FBgn0003944, FBgn00513…	0.00010265
GO:0010646	regulation of cell communication	108	3.08106e-06	FBgn0041604, FBgn0038401, FBgn0035073, FBgn0003165, FBgn0020224, FBgn0001075, FBgn0010504, FBgn0038304, FBgn0260003, FBgn0002413, FBgn0010303, FBgn0003371, FBgn0002791, FBgn0024846, FBgn0044323, FBgn0001263, FBgn0011236, FBgn0014388, FBgn0037657, FBgn0259246, FBgn0023172, FBgn0261261, FBgn0001169, FBgn0004583, FBgn0033349, FBgn0028546, FBgn0015286, FBgn0015024, FBgn0085450, FBgn0000117, FBgn00242…	0.000155234
GO:0045595	regulation of cell differentiation	71	4.25478e-06	FBgn0001981, FBgn0003165, FBgn0013343, FBgn0027609, FBgn0038947, FBgn0041161, FBgn0010300, FBgn0024252, FBgn0026317, FBgn0016917, FBgn0085432, FBgn0010303, FBgn0010341, FBgn0003371, FBgn0031005, FBgn0000382, FBgn0033378, FBgn0086384, FBgn0011666, FBgn0259108, FBgn0002791, FBgn0001624, FBgn0016700, FBgn0035060, FBgn0000146, FBgn0029157, FBgn0004595, FBgn0014388, FBgn0053193, FBgn0023172, FBgn00412…	0.000210961
GO:0009888	tissue development	144	4.89364e-06	FBgn0010389, FBgn0036029, FBgn0027538, FBgn0034366, FBgn0020224, FBgn0001075, FBgn0026207, FBgn0002526, FBgn0002525, FBgn0004049, FBgn0002413, FBgn0010303, FBgn0010894, FBgn0034155, FBgn0003371, FBgn0025697, FBgn0259108, FBgn0044323, FBgn0011723, FBgn0014388, FBgn0086347, FBgn0003944, FBgn0000568, FBgn0039213, FBgn0000565, FBgn0023172, FBgn0086655, FBgn0026562, FBgn0028992, FBgn0000064, FBgn00046…	0.000238843
GO:0033554	cellular response to stress	68	5.34833e-06	FBgn0001179, FBgn0034366, FBgn0031399, FBgn0038704, FBgn0033273, FBgn0027914, FBgn0024252, FBgn0026869, FBgn0010303, FBgn0010341, FBgn0032698, FBgn0027378, FBgn0015553, FBgn0027375, FBgn0037141, FBgn0036843, FBgn0044323, FBgn0037202, FBgn0014018, FBgn0015546, FBgn0034976, FBgn0037301, FBgn0026323, FBgn0004698, FBgn0003462, FBgn0039164, FBgn0038035, FBgn0033929, FBgn0040281, FBgn0029798, FBgn00433…	0.000257016
GO:0044257	cellular protein catabolic process	70	5.73361e-06	FBgn0029996, FBgn0010288, FBgn0030674, FBgn0032467, FBgn0039632, FBgn0030809, FBgn0040230, FBgn0034989, FBgn0031107, FBgn0050421, FBgn0039025, FBgn0028476, FBgn0039875, FBgn0026316, FBgn0029006, FBgn0032596, FBgn0023444, FBgn0035136, FBgn0000173, FBgn0034410, FBgn0002791, FBgn0261268, FBgn0013717, FBgn0029113, FBgn0028694, FBgn0250843, FBgn0015509, FBgn0030863, FBgn0032210, FBgn0086134, FBgn00309…	0.000271355
GO:0051603	proteolysis involved in cellular protein catabolic process	70	5.73361e-06	FBgn0029996, FBgn0010288, FBgn0030674, FBgn0032467, FBgn0039632, FBgn0030809, FBgn0040230, FBgn0034989, FBgn0031107, FBgn0050421, FBgn0039025, FBgn0028476, FBgn0039875, FBgn0026316, FBgn0029006, FBgn0032596, FBgn0023444, FBgn0035136, FBgn0000173, FBgn0034410, FBgn0002791, FBgn0261268, FBgn0013717, FBgn0029113, FBgn0028694, FBgn0250843, FBgn0015509, FBgn0030863, FBgn0032210, FBgn0086134, FBgn00309…	0.000271355
GO:0030163	protein catabolic process	75	5.9086e-06	FBgn0029996, FBgn0010288, FBgn0030674, FBgn0032467, FBgn0039632, FBgn0030809, FBgn0040230, FBgn0034989, FBgn0031107, FBgn0050421, FBgn0039025, FBgn0028476, FBgn0039875, FBgn0026316, FBgn0029006, FBgn0023444, FBgn0032596, FBgn0035136, FBgn0000173, FBgn0034410, FBgn0002791, FBgn0029113, FBgn0261268, FBgn0013717, FBgn0028694, FBgn0250843, FBgn0015509, FBgn0030863, FBgn0032210, FBgn0036702, FBgn00861…	0.000275463
GO:0007568	aging	42	6.11557e-06	FBgn0000257, FBgn0035789, FBgn0035623, FBgn0003210, FBgn0036191, FBgn0036816, FBgn0028956, FBgn0034366, FBgn0033846, FBgn0037960, FBgn0045443, FBgn0010213, FBgn0037802, FBgn0021796, FBgn0026317, FBgn0040294, FBgn0010303, FBgn0004373, FBgn0037873, FBgn0030766, FBgn0004901, FBgn0026439, FBgn0035132, FBgn0002774, FBgn0001087, FBgn0002921, FBgn0005198, FBgn0002566, FBgn0000482, FBgn0003462, FBgn00035…	0.000280918
GO:0008340	determination of adult life span	42	6.11557e-06	FBgn0000257, FBgn0035789, FBgn0035623, FBgn0003210, FBgn0036191, FBgn0036816, FBgn0028956, FBgn0034366, FBgn0033846, FBgn0037960, FBgn0045443, FBgn0010213, FBgn0037802, FBgn0021796, FBgn0026317, FBgn0040294, FBgn0010303, FBgn0004373, FBgn0037873, FBgn0030766, FBgn0004901, FBgn0026439, FBgn0035132, FBgn0002774, FBgn0001087, FBgn0002921, FBgn0005198, FBgn0002566, FBgn0000482, FBgn0003462, FBgn00035…	0.000280918
GO:0010259	multicellular organismal aging	42	6.11557e-06	FBgn0000257, FBgn0035789, FBgn0035623, FBgn0003210, FBgn0036191, FBgn0036816, FBgn0028956, FBgn0034366, FBgn0033846, FBgn0037960, FBgn0045443, FBgn0010213, FBgn0037802, FBgn0021796, FBgn0026317, FBgn0040294, FBgn0010303, FBgn0004373, FBgn0037873, FBgn0030766, FBgn0004901, FBgn0026439, FBgn0035132, FBgn0002774, FBgn0001087, FBgn0002921, FBgn0005198, FBgn0002566, FBgn0000482, FBgn0003462, FBgn00035…	0.000280918
GO:0006911	phagocytosis, engulfment	71	6.59084e-06	FBgn0029504, FBgn0026597, FBgn0013746, FBgn0036194, FBgn0000346, FBgn0028382, FBgn0036875, FBgn0036211, FBgn0087005, FBgn0032167, FBgn0026192, FBgn0010300, FBgn0083963, FBgn0011771, FBgn0027605, FBgn0038049, FBgn0010341, FBgn0025582, FBgn0031090, FBgn0028471, FBgn0042085, FBgn0033714, FBgn0012051, FBgn0051064, FBgn0044323, FBgn0039120, FBgn0032250, FBgn0005198, FBgn0011236, FBgn0004595, FBgn00313…	0.000298359
GO:0006725	cellular aromatic compound metabolic process	38	8.97822e-06	FBgn0000257, FBgn0003210, FBgn0086450, FBgn0010329, FBgn0000422, FBgn0030407, FBgn0000447, FBgn0003515, FBgn0003189, FBgn0003008, FBgn0019948, FBgn0036565, FBgn0000109, FBgn0037942, FBgn0052626, FBgn0016013, FBgn0031824, FBgn0004087, FBgn0005626, FBgn0004901, FBgn0003257, FBgn0000247, FBgn0001087, FBgn0000316, FBgn0037697, FBgn0002567, FBgn0002566, FBgn0005278, FBgn0032054, FBgn0000482, FBgn00375…	0.000400607
GO:0070727	cellular macromolecule localization	87	1.00312e-05	FBgn0038808, FBgn0039132, FBgn0031456, FBgn0003475, FBgn0013343, FBgn0026207, FBgn0038947, FBgn0041161, FBgn0040475, FBgn0027605, FBgn0083968, FBgn0029789, FBgn0031450, FBgn0001337, FBgn0030669, FBgn0033378, FBgn0086384, FBgn0020497, FBgn0037702, FBgn0032005, FBgn0010638, FBgn0011823, FBgn0035165, FBgn0013756, FBgn0002566, FBgn0000146, FBgn0000482, FBgn0052654, FBgn0014877, FBgn0027360, FBgn00159…	0.000441279
GO:0048869	cellular developmental process	321	1.00604e-05	FBgn0013746, FBgn0250876, FBgn0027538, FBgn0033846, FBgn0003165, FBgn0020224, FBgn0001075, FBgn0033179, FBgn0003435, FBgn0010300, FBgn0041161, FBgn0002413, FBgn0010303, FBgn0034155, FBgn0031005, FBgn0001168, FBgn0035954, FBgn0259108, FBgn0013759, FBgn0000629, FBgn0044323, FBgn0243516, FBgn0035956, FBgn0029094, FBgn0005410, FBgn0014388, FBgn0010109, FBgn0041174, FBgn0003944, FBgn0259243, FBgn00137…	0.000436418
GO:0019941	modification-dependent protein catabolic process	65	1.05226e-05	FBgn0029996, FBgn0010288, FBgn0030674, FBgn0032467, FBgn0039632, FBgn0040230, FBgn0034989, FBgn0030809, FBgn0031107, FBgn0050421, FBgn0039025, FBgn0028476, FBgn0039875, FBgn0026316, FBgn0029006, FBgn0023444, FBgn0035136, FBgn0000173, FBgn0034410, FBgn0002791, FBgn0261268, FBgn0013717, FBgn0029113, FBgn0028694, FBgn0250843, FBgn0015509, FBgn0030863, FBgn0032210, FBgn0086134, FBgn0030969, FBgn00322…	0.000450209
GO:0032774	RNA biosynthetic process	55	1.05357e-05	FBgn0001179, FBgn0024909, FBgn0003687, FBgn0022936, FBgn0011836, FBgn0031657, FBgn0040273, FBgn0039066, FBgn0010300, FBgn0031868, FBgn0038903, FBgn0036581, FBgn0010280, FBgn0037540, FBgn0030687, FBgn0037202, FBgn0038578, FBgn0035754, FBgn0011762, FBgn0033929, FBgn0051390, FBgn0038371, FBgn0031873, FBgn0015828, FBgn0028982, FBgn0010247, FBgn0031309, FBgn0027592, FBgn0011291, FBgn0011290, FBgn02596…	0.000444683
GO:0045185	maintenance of protein location	22	1.0611e-05	FBgn0260442, FBgn0024227, FBgn0020440, FBgn0028427, FBgn0027508, FBgn0011016, FBgn0000405, FBgn0001250, FBgn0000117, FBgn0021760, FBgn0011692, FBgn0021795, FBgn0043884, FBgn0086356, FBgn0000667, FBgn0011747, FBgn0041789, FBgn0010215, FBgn0010341, FBgn0004379, FBgn0040080, FBgn0010247	0.000441889
GO:0051716	cellular response to stimulus	94	1.29e-05	FBgn0001179, FBgn0034366, FBgn0031399, FBgn0038704, FBgn0033273, FBgn0032515, FBgn0027914, FBgn0024252, FBgn0026869, FBgn0026317, FBgn0010303, FBgn0010341, FBgn0032698, FBgn0015553, FBgn0027378, FBgn0030670, FBgn0031693, FBgn0027375, FBgn0037141, FBgn0025697, FBgn0036843, FBgn0001263, FBgn0026722, FBgn0044323, FBgn0037202, FBgn0014018, FBgn0015546, FBgn0034976, FBgn0037301, FBgn0026323, FBgn00166…	0.000530122
GO:0043632	modification-dependent macromolecule catabolic process	65	1.3124e-05	FBgn0029996, FBgn0010288, FBgn0030674, FBgn0032467, FBgn0039632, FBgn0040230, FBgn0034989, FBgn0030809, FBgn0031107, FBgn0050421, FBgn0039025, FBgn0028476, FBgn0039875, FBgn0026316, FBgn0029006, FBgn0023444, FBgn0035136, FBgn0000173, FBgn0034410, FBgn0002791, FBgn0261268, FBgn0013717, FBgn0029113, FBgn0028694, FBgn0250843, FBgn0015509, FBgn0030863, FBgn0032210, FBgn0086134, FBgn0030969, FBgn00322…	0.000532323
GO:0006520	cellular amino acid metabolic process	59	1.65094e-05	FBgn0041607, FBgn0010803, FBgn0003189, FBgn0022774, FBgn0039175, FBgn0037610, FBgn0039877, FBgn0030660, FBgn0016013, FBgn0031824, FBgn0004087, FBgn0004901, FBgn0085384, FBgn0052068, FBgn0051739, FBgn0034067, FBgn0036462, FBgn0001125, FBgn0037697, FBgn0035064, FBgn0037146, FBgn0027090, FBgn0027083, FBgn0003423, FBgn0004034, FBgn0027085, FBgn0027084, FBgn0037305, FBgn0000565, FBgn0040211, FBgn00270…	0.000661011
GO:0048699	generation of neurons	150	1.93856e-05	FBgn0041604, FBgn0250876, FBgn0003165, FBgn0014163, FBgn0000137, FBgn0033179, FBgn0003435, FBgn0002526, FBgn0010300, FBgn0010303, FBgn0010280, FBgn0030330, FBgn0010382, FBgn0031005, FBgn0001168, FBgn0259108, FBgn0044323, FBgn0000629, FBgn0261268, FBgn0023489, FBgn0015014, FBgn0035754, FBgn0029094, FBgn0003654, FBgn0014388, FBgn0010109, FBgn0005619, FBgn0023172, FBgn0035357, FBgn0086655, FBgn00866…	0.000766305
GO:0010467	gene expression	362	1.99926e-05	FBgn0033842, FBgn0001179, FBgn0004567, FBgn0022936, FBgn0033846, FBgn0034012, FBgn0035692, FBgn0010803, FBgn0000448, FBgn0042696, FBgn0039175, FBgn0003435, FBgn0010300, FBgn0027784, FBgn0030660, FBgn0038601, FBgn0038903, FBgn0037255, FBgn0034410, FBgn0034703, FBgn0037540, FBgn0030669, FBgn0001168, FBgn0004556, FBgn0000629, FBgn0037249, FBgn0033029, FBgn0029094, FBgn0044510, FBgn0022942, FBgn00004…	0.000780415
GO:0044106	cellular amine metabolic process	65	2.02036e-05	FBgn0041607, FBgn0010803, FBgn0003189, FBgn0000303, FBgn0022774, FBgn0039175, FBgn0037610, FBgn0039877, FBgn0030660, FBgn0016013, FBgn0004087, FBgn0031824, FBgn0004901, FBgn0085384, FBgn0051739, FBgn0052068, FBgn0034067, FBgn0036462, FBgn0001125, FBgn0037697, FBgn0035064, FBgn0019932, FBgn0037146, FBgn0027090, FBgn0027083, FBgn0003423, FBgn0004034, FBgn0027085, FBgn0037305, FBgn0027084, FBgn00005…	0.000778914
GO:0007268	synaptic transmission	70	2.02661e-05	FBgn0031454, FBgn0052056, FBgn0013749, FBgn0000346, FBgn0040230, FBgn0039132, FBgn0003165, FBgn0005586, FBgn0013343, FBgn0000303, FBgn0016672, FBgn0039774, FBgn0000479, FBgn0031450, FBgn0259108, FBgn0002791, FBgn0013759, FBgn0001624, FBgn0001125, FBgn0035060, FBgn0039928, FBgn0040285, FBgn0259243, FBgn0039212, FBgn0053094, FBgn0259246, FBgn0013750, FBgn0004179, FBgn0001123, FBgn0000330, FBgn00535…	0.000771799
GO:0048513	organ development	322	2.06503e-05	FBgn0250876, FBgn0027538, FBgn0020224, FBgn0001075, FBgn0000448, FBgn0013343, FBgn0033179, FBgn0010300, FBgn0004049, FBgn0002413, FBgn0023407, FBgn0010303, FBgn0034155, FBgn0031005, FBgn0001168, FBgn0025697, FBgn0035954, FBgn0259108, FBgn0000629, FBgn0044323, FBgn0035956, FBgn0003175, FBgn0029094, FBgn0000439, FBgn0005410, FBgn0014388, FBgn0041174, FBgn0037657, FBgn0003944, FBgn0004179, FBgn00231…	0.000776952
GO:0006399	tRNA metabolic process	41	2.20745e-05	FBgn0033842, FBgn0036000, FBgn0039153, FBgn0083992, FBgn0030554, FBgn0010803, FBgn0039175, FBgn0036569, FBgn0031238, FBgn0026079, FBgn0002069, FBgn0030007, FBgn0052281, FBgn0030660, FBgn0053123, FBgn0027079, FBgn0034703, FBgn0051739, FBgn0043799, FBgn0034401, FBgn0036462, FBgn0051812, FBgn0038576, FBgn0035064, FBgn0036266, FBgn0037708, FBgn0035831, FBgn0032054, FBgn0027090, FBgn0027083, FBgn00839…	0.000820632
GO:0009791	post-embryonic development	138	2.41331e-05	FBgn0041604, FBgn0010389, FBgn0034366, FBgn0020224, FBgn0011224, FBgn0001075, FBgn0000139, FBgn0260003, FBgn0042641, FBgn0002413, FBgn0010303, FBgn0003371, FBgn0031005, FBgn0025697, FBgn0029117, FBgn0024846, FBgn0261268, FBgn0034876, FBgn0003175, FBgn0016687, FBgn0005410, FBgn0037657, FBgn0003944, FBgn0000568, FBgn0015925, FBgn0000565, FBgn0015544, FBgn0002031, FBgn0000242, FBgn0036801, FBgn00866…	0.000886579
GO:0006351	transcription, DNA-dependent	53	2.52933e-05	FBgn0001179, FBgn0024909, FBgn0003687, FBgn0022936, FBgn0011836, FBgn0031657, FBgn0040273, FBgn0039066, FBgn0010300, FBgn0031868, FBgn0036581, FBgn0038903, FBgn0010280, FBgn0037540, FBgn0030687, FBgn0037202, FBgn0038578, FBgn0035754, FBgn0033929, FBgn0051390, FBgn0038371, FBgn0031873, FBgn0015828, FBgn0028982, FBgn0010247, FBgn0031309, FBgn0027592, FBgn0011291, FBgn0011290, FBgn0040020, FBgn00347…	0.000918382
GO:0070647	protein modification by small protein conjugation or removal	32	2.56902e-05	FBgn0029996, FBgn0261112, FBgn0010288, FBgn0032467, FBgn0030809, FBgn0036546, FBgn0025638, FBgn0031107, FBgn0086694, FBgn0086442, FBgn0027057, FBgn0027609, FBgn0027055, FBgn0027936, FBgn0029006, FBgn0041100, FBgn0035136, FBgn0259174, FBgn0000173, FBgn0027053, FBgn0030600, FBgn0034410, FBgn0044020, FBgn0003410, FBgn0029113, FBgn0013717, FBgn0032210, FBgn0041174, FBgn0035853, FBgn0030366, FBgn00288…	0.000922071
GO:0006352	transcription initiation	34	2.58543e-05	FBgn0001179, FBgn0022936, FBgn0003687, FBgn0024909, FBgn0027592, FBgn0011836, FBgn0011291, FBgn0011290, FBgn0040020, FBgn0034722, FBgn0036581, FBgn0010280, FBgn0037202, FBgn0038578, FBgn0010356, FBgn0028398, FBgn0034503, FBgn0026441, FBgn0035754, FBgn0038760, FBgn0033929, FBgn0037981, FBgn0051390, FBgn0015618, FBgn0038499, FBgn0004915, FBgn0037262, FBgn0024956, FBgn0034795, FBgn0031873, FBgn00159…	0.000917417
GO:0051235	maintenance of location	25	2.79617e-05	FBgn0260442, FBgn0020440, FBgn0002736, FBgn0000405, FBgn0001250, FBgn0000117, FBgn0021795, FBgn0011692, FBgn0043884, FBgn0086356, FBgn0010215, FBgn0010341, FBgn0041789, FBgn0004379, FBgn0040080, FBgn0024227, FBgn0028427, FBgn0027508, FBgn0011016, FBgn0000057, FBgn0021760, FBgn0000146, FBgn0000667, FBgn0011747, FBgn0010247	0.00098102
GO:0048731	system development	389	2.97817e-05	FBgn0250876, FBgn0003165, FBgn0020224, FBgn0001075, FBgn0013343, FBgn0033179, FBgn0003435, FBgn0004049, FBgn0023407, FBgn0001168, FBgn0035954, FBgn0000629, FBgn0035956, FBgn0003175, FBgn0029094, FBgn0003944, FBgn0004179, FBgn0023172, FBgn0001169, FBgn0026562, FBgn0000064, FBgn0028546, FBgn0015239, FBgn0033159, FBgn0020306, FBgn0015331, FBgn0020307, FBgn0020309, FBgn0003053, FBgn0039286, FBgn00034…	0.00103324
GO:0007552	metamorphosis	118	3.0283e-05	FBgn0041604, FBgn0034366, FBgn0020224, FBgn0011224, FBgn0001075, FBgn0000139, FBgn0000448, FBgn0260003, FBgn0042641, FBgn0002413, FBgn0010303, FBgn0003371, FBgn0031005, FBgn0025697, FBgn0024846, FBgn0261268, FBgn0034876, FBgn0003175, FBgn0005410, FBgn0003944, FBgn0000568, FBgn0037657, FBgn0000565, FBgn0015544, FBgn0000242, FBgn0036801, FBgn0086655, FBgn0028992, FBgn0028546, FBgn0015239, FBgn00012…	0.00103908
GO:0007155	cell adhesion	65	3.06833e-05	FBgn0001075, FBgn0037963, FBgn0260004, FBgn0002526, FBgn0026192, FBgn0038181, FBgn0010238, FBgn0010382, FBgn0025697, FBgn0010435, FBgn0013759, FBgn0001624, FBgn0028427, FBgn0038439, FBgn0016700, FBgn0027562, FBgn0053531, FBgn0039928, FBgn0004828, FBgn0039924, FBgn0058006, FBgn0035290, FBgn0000180, FBgn0259240, FBgn0045073, FBgn0261261, FBgn0026562, FBgn0027515, FBgn0000221, FBgn0024753, FBgn00012…	0.00104137
GO:0051301	cell division	74	3.13009e-05	FBgn0002914, FBgn0011674, FBgn0024689, FBgn0000404, FBgn0000405, FBgn0001981, FBgn0014029, FBgn0003165, FBgn0259791, FBgn0013343, FBgn0010300, FBgn0016917, FBgn0032698, FBgn0031090, FBgn0010382, FBgn0004901, FBgn0040080, FBgn0024227, FBgn0011666, FBgn0002924, FBgn0040078, FBgn0015772, FBgn0003525, FBgn0000146, FBgn0004595, FBgn0086906, FBgn0013750, FBgn0026433, FBgn0011207, FBgn0000117, FBgn00315…	0.00105091
GO:0016310	phosphorylation	135	3.15958e-05	FBgn0031696, FBgn0010389, FBgn0038588, FBgn0035600, FBgn0028665, FBgn0032511, FBgn0030853, FBgn0028662, FBgn0034789, FBgn0001079, FBgn0002413, FBgn0010303, FBgn0031860, FBgn0260935, FBgn0037873, FBgn0003371, FBgn0024227, FBgn0259680, FBgn0013759, FBgn0024846, FBgn0039623, FBgn0040705, FBgn0003178, FBgn0039924, FBgn0034568, FBgn0260945, FBgn0028484, FBgn0000063, FBgn0014006, FBgn0013435, FBgn00002…	0.00104952
GO:0007242	intracellular signaling cascade	100	3.17762e-05	FBgn0015000, FBgn0013749, FBgn0024944, FBgn0034694, FBgn0053958, FBgn0010303, FBgn0032698, FBgn0031090, FBgn0010382, FBgn0259680, FBgn0243513, FBgn0024846, FBgn0044323, FBgn0030869, FBgn0016687, FBgn0015925, FBgn0259243, FBgn0028717, FBgn0028487, FBgn0034568, FBgn0013750, FBgn0031882, FBgn0023172, FBgn0015286, FBgn0035059, FBgn0024277, FBgn0028741, FBgn0019947, FBgn0086356, FBgn0014001, FBgn00043…	0.00104441
GO:0002165	instar larval or pupal development	133	3.332e-05	FBgn0041604, FBgn0034366, FBgn0020224, FBgn0011224, FBgn0001075, FBgn0000139, FBgn0260003, FBgn0042641, FBgn0002413, FBgn0010303, FBgn0003371, FBgn0031005, FBgn0029117, FBgn0025697, FBgn0024846, FBgn0261268, FBgn0034876, FBgn0003175, FBgn0016687, FBgn0005410, FBgn0037657, FBgn0003944, FBgn0000568, FBgn0015925, FBgn0000565, FBgn0015544, FBgn0002031, FBgn0000242, FBgn0036801, FBgn0086655, FBgn00289…	0.00108372
GO:0060284	regulation of cell development	52	3.4512e-05	FBgn0003165, FBgn0013343, FBgn0027609, FBgn0038947, FBgn0041161, FBgn0010300, FBgn0024252, FBgn0010341, FBgn0031005, FBgn0000382, FBgn0033378, FBgn0086384, FBgn0002791, FBgn0259108, FBgn0001624, FBgn0035060, FBgn0016700, FBgn0000146, FBgn0029157, FBgn0004595, FBgn0014388, FBgn0053193, FBgn0023172, FBgn0041203, FBgn0002736, FBgn0024277, FBgn0004647, FBgn0024273, FBgn0261014, FBgn0003317, FBgn02507…	0.0011109
GO:0007399	nervous system development	207	3.46913e-05	FBgn0250876, FBgn0003165, FBgn0000448, FBgn0033179, FBgn0003435, FBgn0010300, FBgn0010303, FBgn0031005, FBgn0001168, FBgn0259108, FBgn0044323, FBgn0000629, FBgn0029094, FBgn0000439, FBgn0010109, FBgn0014388, FBgn0004179, FBgn0023172, FBgn0086655, FBgn0004583, FBgn0086680, FBgn0033159, FBgn0024277, FBgn0024273, FBgn0011692, FBgn0015331, FBgn0005427, FBgn0000320, FBgn0000313, FBgn0003053, FBgn00013…	0.00110528
GO:0009966	regulation of signal transduction	99	3.48025e-05	FBgn0041604, FBgn0038401, FBgn0035073, FBgn0020224, FBgn0001075, FBgn0010504, FBgn0038304, FBgn0010303, FBgn0003371, FBgn0044323, FBgn0001263, FBgn0024846, FBgn0011236, FBgn0014388, FBgn0037657, FBgn0023172, FBgn0261261, FBgn0001169, FBgn0004583, FBgn0033349, FBgn0028546, FBgn0015286, FBgn0015024, FBgn0085450, FBgn0000117, FBgn0024277, FBgn0259678, FBgn0033773, FBgn0027932, FBgn0020309, FBgn00863…	0.00109763
GO:0006367	transcription initiation from RNA polymerase II promoter	31	3.6663e-05	FBgn0001179, FBgn0022936, FBgn0003687, FBgn0024909, FBgn0027592, FBgn0011836, FBgn0011291, FBgn0011290, FBgn0040020, FBgn0036581, FBgn0010280, FBgn0037202, FBgn0038578, FBgn0010356, FBgn0028398, FBgn0034503, FBgn0026441, FBgn0035754, FBgn0038760, FBgn0033929, FBgn0037981, FBgn0051390, FBgn0015618, FBgn0004915, FBgn0037262, FBgn0024956, FBgn0031873, FBgn0034795, FBgn0015828, FBgn0035145, FBgn00313…	0.00114472
GO:0006366	transcription from RNA polymerase II promoter	42	3.78354e-05	FBgn0001179, FBgn0024909, FBgn0022936, FBgn0003687, FBgn0027592, FBgn0011836, FBgn0011291, FBgn0011290, FBgn0040020, FBgn0040273, FBgn0039066, FBgn0036581, FBgn0010422, FBgn0010280, FBgn0037540, FBgn0037202, FBgn0038578, FBgn0010356, FBgn0028398, FBgn0034503, FBgn0026441, FBgn0004396, FBgn0035754, FBgn0026873, FBgn0038760, FBgn0033929, FBgn0037981, FBgn0002542, FBgn0051390, FBgn0015618, FBgn00140…	0.00116961
GO:0019226	transmission of nerve impulse	71	4.05979e-05	FBgn0031454, FBgn0052056, FBgn0013749, FBgn0000346, FBgn0040230, FBgn0039132, FBgn0003165, FBgn0005586, FBgn0013343, FBgn0000303, FBgn0016672, FBgn0039774, FBgn0000479, FBgn0031450, FBgn0259108, FBgn0002791, FBgn0013759, FBgn0001624, FBgn0001125, FBgn0035060, FBgn0039928, FBgn0040285, FBgn0259243, FBgn0039212, FBgn0053094, FBgn0259246, FBgn0013750, FBgn0004179, FBgn0001123, FBgn0000330, FBgn00535…	0.00124266
GO:0016197	endosome transport	16	4.23562e-05	FBgn0053635, FBgn0000257, FBgn0086384, FBgn0013749, FBgn0004583, FBgn0001087, FBgn0021814, FBgn0031537, FBgn0015795, FBgn0028741, FBgn0000482, FBgn0021796, FBgn0011232, FBgn0013750, FBgn0086676, FBgn0031450	0.00128387
GO:0022008	neurogenesis	154	4.41711e-05	FBgn0041604, FBgn0010389, FBgn0250876, FBgn0003165, FBgn0014163, FBgn0000137, FBgn0033179, FBgn0003435, FBgn0002526, FBgn0010300, FBgn0010303, FBgn0010280, FBgn0030330, FBgn0010382, FBgn0010894, FBgn0031005, FBgn0001168, FBgn0259108, FBgn0044323, FBgn0000629, FBgn0261268, FBgn0023489, FBgn0015014, FBgn0035754, FBgn0029094, FBgn0003654, FBgn0014388, FBgn0010109, FBgn0011230, FBgn0005619, FBgn00231…	0.00132598
GO:0048707	instar larval or pupal morphogenesis	113	4.76559e-05	FBgn0041604, FBgn0034366, FBgn0020224, FBgn0011224, FBgn0001075, FBgn0000139, FBgn0260003, FBgn0042641, FBgn0002413, FBgn0010303, FBgn0003371, FBgn0031005, FBgn0025697, FBgn0024846, FBgn0261268, FBgn0034876, FBgn0003175, FBgn0005410, FBgn0003944, FBgn0000568, FBgn0037657, FBgn0000565, FBgn0015544, FBgn0000242, FBgn0036801, FBgn0086655, FBgn0028992, FBgn0028546, FBgn0015239, FBgn0001250, FBgn00003…	0.00141691
GO:0051246	regulation of protein metabolic process	69	4.82542e-05	FBgn0029996, FBgn0038808, FBgn0035601, FBgn0003165, FBgn0003612, FBgn0001079, FBgn0027609, FBgn0010300, FBgn0010303, FBgn0026316, FBgn0033935, FBgn0023444, FBgn0000173, FBgn0053822, FBgn0010382, FBgn0027053, FBgn0003371, FBgn0011666, FBgn0037249, FBgn0036462, FBgn0261268, FBgn0028695, FBgn0028429, FBgn0028692, FBgn0030863, FBgn0000146, FBgn0005410, FBgn0058045, FBgn0027619, FBgn0035853, FBgn02592…	0.00142116
GO:0022603	regulation of anatomical structure morphogenesis	60	5.68674e-05	FBgn0010389, FBgn0027609, FBgn0038947, FBgn0026192, FBgn0024252, FBgn0011771, FBgn0010341, FBgn0010382, FBgn0032859, FBgn0000382, FBgn0086384, FBgn0013759, FBgn0243516, FBgn0016700, FBgn0002921, FBgn0000384, FBgn0004828, FBgn0029157, FBgn0039924, FBgn0000723, FBgn0014388, FBgn0025455, FBgn0053193, FBgn0023172, FBgn0031781, FBgn0041203, FBgn0027515, FBgn0014006, FBgn0020440, FBgn0001250, FBgn00001…	0.00165898
GO:0006793	phosphorus metabolic process	167	5.96965e-05	FBgn0031696, FBgn0010389, FBgn0038588, FBgn0035945, FBgn0035600, FBgn0062449, FBgn0028665, FBgn0032511, FBgn0030853, FBgn0028662, FBgn0034789, FBgn0001079, FBgn0016672, FBgn0022160, FBgn0023508, FBgn0002413, FBgn0010303, FBgn0030761, FBgn0031860, FBgn0260935, FBgn0031294, FBgn0037873, FBgn0003371, FBgn0259680, FBgn0024227, FBgn0013759, FBgn0024846, FBgn0039623, FBgn0011826, FBgn0016687, FBgn00407…	0.00172534
GO:0006796	phosphate metabolic process	167	5.96965e-05	FBgn0031696, FBgn0010389, FBgn0038588, FBgn0035945, FBgn0035600, FBgn0062449, FBgn0028665, FBgn0032511, FBgn0030853, FBgn0028662, FBgn0034789, FBgn0001079, FBgn0016672, FBgn0022160, FBgn0023508, FBgn0002413, FBgn0010303, FBgn0030761, FBgn0031860, FBgn0260935, FBgn0031294, FBgn0037873, FBgn0003371, FBgn0259680, FBgn0024227, FBgn0013759, FBgn0024846, FBgn0039623, FBgn0011826, FBgn0016687, FBgn00407…	0.00172534
GO:0007275	multicellular organismal development	532	6.11809e-05	FBgn0250876, FBgn0033846, FBgn0003165, FBgn0020224, FBgn0001075, FBgn0013343, FBgn0033179, FBgn0029088, FBgn0001079, FBgn0003435, FBgn0004049, FBgn0023407, FBgn0001168, FBgn0035954, FBgn0000629, FBgn0035956, FBgn0003175, FBgn0029094, FBgn0087012, FBgn0002174, FBgn0004034, FBgn0003944, FBgn0004179, FBgn0002031, FBgn0023172, FBgn0023179, FBgn0023511, FBgn0001169, FBgn0026562, FBgn0000064, FBgn00285…	0.001752
GO:0010556	regulation of macromolecule biosynthetic process	251	6.22862e-05	FBgn0038808, FBgn0029504, FBgn0013746, FBgn0004567, FBgn0033846, FBgn0032940, FBgn0034012, FBgn0003165, FBgn0000448, FBgn0042696, FBgn0001079, FBgn0010300, FBgn0037445, FBgn0032698, FBgn0010303, FBgn0038903, FBgn0034410, FBgn0037540, FBgn0001168, FBgn0035954, FBgn0037249, FBgn0000629, FBgn0033029, FBgn0013753, FBgn0035956, FBgn0029094, FBgn0000439, FBgn0005410, FBgn0010109, FBgn0037657, FBgn00039…	0.00176742
GO:0007444	imaginal disc development	130	6.33433e-05	FBgn0041604, FBgn0020224, FBgn0011224, FBgn0001075, FBgn0013343, FBgn0000139, FBgn0260003, FBgn0023407, FBgn0042641, FBgn0002413, FBgn0010303, FBgn0003371, FBgn0031005, FBgn0024846, FBgn0261268, FBgn0034876, FBgn0003175, FBgn0011826, FBgn0011236, FBgn0005410, FBgn0037657, FBgn0003944, FBgn0003659, FBgn0015544, FBgn0000242, FBgn0036801, FBgn0086655, FBgn0001169, FBgn0028992, FBgn0004583, FBgn00285…	0.00178121
GO:0009886	post-embryonic morphogenesis	114	6.52574e-05	FBgn0041604, FBgn0034366, FBgn0020224, FBgn0011224, FBgn0001075, FBgn0000139, FBgn0260003, FBgn0042641, FBgn0002413, FBgn0010303, FBgn0003371, FBgn0031005, FBgn0025697, FBgn0024846, FBgn0261268, FBgn0034876, FBgn0003175, FBgn0005410, FBgn0003944, FBgn0000568, FBgn0037657, FBgn0000565, FBgn0015544, FBgn0000242, FBgn0036801, FBgn0086655, FBgn0028992, FBgn0028546, FBgn0015239, FBgn0001250, FBgn00003…	0.00181862
GO:0051239	regulation of multicellular organismal process	95	6.76924e-05	FBgn0041604, FBgn0000404, FBgn0032840, FBgn0003165, FBgn0001075, FBgn0013343, FBgn0038947, FBgn0027609, FBgn0260003, FBgn0002526, FBgn0041161, FBgn0010300, FBgn0021796, FBgn0024252, FBgn0002413, FBgn0085432, FBgn0010303, FBgn0010341, FBgn0037874, FBgn0003371, FBgn0031005, FBgn0000382, FBgn0033378, FBgn0086384, FBgn0002791, FBgn0259108, FBgn0001624, FBgn0016700, FBgn0035060, FBgn0000384, FBgn00001…	0.00186974
GO:0032989	cellular component morphogenesis	158	6.78577e-05	FBgn0041604, FBgn0002914, FBgn0261276, FBgn0250876, FBgn0033846, FBgn0003165, FBgn0020224, FBgn0014163, FBgn0001075, FBgn0003435, FBgn0002526, FBgn0027605, FBgn0002413, FBgn0010303, FBgn0010280, FBgn0030330, FBgn0010382, FBgn0001168, FBgn0259108, FBgn0013759, FBgn0000629, FBgn0261268, FBgn0015014, FBgn0035754, FBgn0029094, FBgn0000146, FBgn0002926, FBgn0014388, FBgn0010109, FBgn0035357, FBgn00866…	0.00185787
GO:0030029	actin filament-based process	55	6.8775e-05	FBgn0001139, FBgn0038294, FBgn0003475, FBgn0025641, FBgn0011771, FBgn0027605, FBgn0010341, FBgn0010303, FBgn0012051, FBgn0032859, FBgn0243516, FBgn0016700, FBgn0029157, FBgn0039924, FBgn0000723, FBgn0025455, FBgn0086906, FBgn0259243, FBgn0000667, FBgn0023172, FBgn0031781, FBgn0011661, FBgn0041203, FBgn0000256, FBgn0023081, FBgn0001250, FBgn0020386, FBgn0024277, FBgn0259678, FBgn0004647, FBgn00137…	0.00186661
GO:0030154	cell differentiation	297	6.96065e-05	FBgn0013746, FBgn0250876, FBgn0027538, FBgn0033846, FBgn0003165, FBgn0020224, FBgn0001075, FBgn0033179, FBgn0003435, FBgn0010300, FBgn0041161, FBgn0002413, FBgn0010303, FBgn0034155, FBgn0031005, FBgn0001168, FBgn0035954, FBgn0259108, FBgn0000629, FBgn0044323, FBgn0243516, FBgn0035956, FBgn0029094, FBgn0005410, FBgn0014388, FBgn0010109, FBgn0041174, FBgn0003944, FBgn0259243, FBgn0013750, FBgn00231…	0.00187288
GO:0044267	cellular protein metabolic process	387	7.10646e-05	FBgn0062449, FBgn0036546, FBgn0052099, FBgn0001075, FBgn0039175, FBgn0001079, FBgn0035558, FBgn0032596, FBgn0034410, FBgn0000629, FBgn0029906, FBgn0027296, FBgn0086134, FBgn0002174, FBgn0023519, FBgn0034568, FBgn0023174, FBgn0004179, FBgn0033021, FBgn0023512, FBgn0023511, FBgn0033544, FBgn0000063, FBgn0036569, FBgn0020306, FBgn0023529, FBgn0035435, FBgn0033052, FBgn0023528, FBgn0034401, FBgn00296…	0.00189575
GO:0034470	ncRNA processing	39	7.70161e-05	FBgn0033842, FBgn0036000, FBgn0053505, FBgn0083992, FBgn0030704, FBgn0030554, FBgn0029148, FBgn0032515, FBgn0259937, FBgn0031238, FBgn0036514, FBgn0026079, FBgn0052281, FBgn0038737, FBgn0036964, FBgn0032408, FBgn0034703, FBgn0023527, FBgn0004556, FBgn0043799, FBgn0026722, FBgn0051812, FBgn0038576, FBgn0011824, FBgn0038146, FBgn0036266, FBgn0022942, FBgn0037708, FBgn0035831, FBgn0032054, FBgn00391…	0.00203697
GO:0034622	cellular macromolecular complex assembly	61	7.85856e-05	FBgn0031454, FBgn0003887, FBgn0003687, FBgn0035805, FBgn0000346, FBgn0031456, FBgn0038294, FBgn0017577, FBgn0011836, FBgn0010341, FBgn0051961, FBgn0260639, FBgn0053822, FBgn0003884, FBgn0031450, FBgn0001337, FBgn0037540, FBgn0035918, FBgn0029117, FBgn0020497, FBgn0011823, FBgn0028554, FBgn0029094, FBgn0004828, FBgn0000146, FBgn0040286, FBgn0030054, FBgn0014879, FBgn0038371, FBgn0039626, FBgn00421…	0.00206099
GO:0032940	secretion by cell	47	7.91777e-05	FBgn0000257, FBgn0030089, FBgn0031454, FBgn0013749, FBgn0028582, FBgn0000346, FBgn0026634, FBgn0039132, FBgn0005586, FBgn0031537, FBgn0013726, FBgn0013343, FBgn0027103, FBgn0029088, FBgn0013997, FBgn0003008, FBgn0250789, FBgn0039774, FBgn0002121, FBgn0250788, FBgn0015816, FBgn0026378, FBgn0031450, FBgn0053653, FBgn0004574, FBgn0013759, FBgn0027505, FBgn0004242, FBgn0035060, FBgn0016700, FBgn00112…	0.00205922
GO:0044255	cellular lipid metabolic process	66	9.11845e-05	FBgn0001941, FBgn0037743, FBgn0026619, FBgn0026718, FBgn0037010, FBgn0033883, FBgn0034789, FBgn0032603, FBgn0040001, FBgn0039774, FBgn0029789, FBgn0039639, FBgn0030670, FBgn0051522, FBgn0025697, FBgn0037044, FBgn0030683, FBgn0029906, FBgn0035811, FBgn0039924, FBgn0053116, FBgn0039360, FBgn0030013, FBgn0030485, FBgn0035265, FBgn0051915, FBgn0000221, FBgn0026576, FBgn0052699, FBgn0028841, FBgn00523…	0.00235156
GO:0032507	maintenance of protein location in cell	19	9.27789e-05	FBgn0260442, FBgn0024227, FBgn0020440, FBgn0028427, FBgn0027508, FBgn0011016, FBgn0000405, FBgn0021760, FBgn0000117, FBgn0011692, FBgn0021795, FBgn0043884, FBgn0086356, FBgn0000667, FBgn0011747, FBgn0041789, FBgn0010215, FBgn0004379, FBgn0010247	0.00237304
GO:0006260	DNA replication	40	9.60378e-05	FBgn0015664, FBgn0002914, FBgn0020633, FBgn0033846, FBgn0017577, FBgn0023181, FBgn0000307, FBgn0086695, FBgn0259676, FBgn0042696, FBgn0032906, FBgn0034430, FBgn0032244, FBgn0032698, FBgn0033690, FBgn0015270, FBgn0004087, FBgn0010382, FBgn0035918, FBgn0037141, FBgn0022338, FBgn0010438, FBgn0034878, FBgn0040268, FBgn0002905, FBgn0002906, FBgn0011764, FBgn0003502, FBgn0030170, FBgn0011762, FBgn00321…	0.00243635
GO:0007163	establishment or maintenance of cell polarity	44	9.71136e-05	FBgn0028992, FBgn0000221, FBgn0000117, FBgn0020224, FBgn0001075, FBgn0004647, FBgn0000497, FBgn0015331, FBgn0013997, FBgn0026192, FBgn0027605, FBgn0003079, FBgn0002413, FBgn0010341, FBgn0010215, FBgn0002121, FBgn0001297, FBgn0067864, FBgn0019968, FBgn0040080, FBgn0000382, FBgn0003053, FBgn0026252, FBgn0013759, FBgn0259212, FBgn0001624, FBgn0005634, FBgn0035085, FBgn0001085, FBgn0003447, FBgn00263…	0.00244376
GO:0007264	small GTPase mediated signal transduction	44	9.71136e-05	FBgn0015000, FBgn0013749, FBgn0015286, FBgn0005586, FBgn0024277, FBgn0086356, FBgn0015372, FBgn0010341, FBgn0031090, FBgn0010398, FBgn0014001, FBgn0001965, FBgn0050372, FBgn0031906, FBgn0015790, FBgn0035089, FBgn0039140, FBgn0031762, FBgn0259212, FBgn0039532, FBgn0016700, FBgn0002567, FBgn0004638, FBgn0015797, FBgn0024555, FBgn0038816, FBgn0015795, FBgn0015794, FBgn0021818, FBgn0015791, FBgn00320…	0.00244376
GO:0009653	anatomical structure morphogenesis	345	9.90506e-05	FBgn0250876, FBgn0027538, FBgn0033846, FBgn0003165, FBgn0020224, FBgn0001075, FBgn0000448, FBgn0013343, FBgn0033179, FBgn0001079, FBgn0003435, FBgn0004049, FBgn0002413, FBgn0010303, FBgn0031005, FBgn0001168, FBgn0025697, FBgn0259108, FBgn0013759, FBgn0000629, FBgn0044323, FBgn0243516, FBgn0003175, FBgn0029094, FBgn0000439, FBgn0005410, FBgn0087012, FBgn0014388, FBgn0010109, FBgn0041174, FBgn00376…	0.00247253
GO:0009889	regulation of biosynthetic process	259	9.93802e-05	FBgn0038808, FBgn0029504, FBgn0013746, FBgn0004567, FBgn0033846, FBgn0032940, FBgn0034012, FBgn0003165, FBgn0000448, FBgn0042696, FBgn0001079, FBgn0010300, FBgn0037445, FBgn0032698, FBgn0010303, FBgn0038903, FBgn0034410, FBgn0037540, FBgn0001168, FBgn0035954, FBgn0037249, FBgn0000629, FBgn0033029, FBgn0013753, FBgn0035956, FBgn0029094, FBgn0000439, FBgn0005410, FBgn0010109, FBgn0037657, FBgn00039…	0.00246109
GO:0031326	regulation of cellular biosynthetic process	259	9.93802e-05	FBgn0038808, FBgn0029504, FBgn0013746, FBgn0004567, FBgn0033846, FBgn0032940, FBgn0034012, FBgn0003165, FBgn0000448, FBgn0042696, FBgn0001079, FBgn0010300, FBgn0037445, FBgn0032698, FBgn0010303, FBgn0038903, FBgn0034410, FBgn0037540, FBgn0001168, FBgn0035954, FBgn0037249, FBgn0000629, FBgn0033029, FBgn0013753, FBgn0035956, FBgn0029094, FBgn0000439, FBgn0005410, FBgn0010109, FBgn0037657, FBgn00039…	0.00246109
GO:0008610	lipid biosynthetic process	47	0.000100537	FBgn0035265, FBgn0001941, FBgn0051915, FBgn0037743, FBgn0000221, FBgn0026619, FBgn0026576, FBgn0026718, FBgn0052699, FBgn0028841, FBgn0037010, FBgn0052380, FBgn0086448, FBgn0033883, FBgn0010328, FBgn0039754, FBgn0002937, FBgn0032603, FBgn0040001, FBgn0035435, FBgn0086687, FBgn0030670, FBgn0000536, FBgn0034270, FBgn0051522, FBgn0019662, FBgn0037044, FBgn0030683, FBgn0061360, FBgn0032811, FBgn00300…	0.00247012
GO:0022604	regulation of cell morphogenesis	47	0.000100537	FBgn0041203, FBgn0014006, FBgn0027515, FBgn0020440, FBgn0010389, FBgn0001250, FBgn0000117, FBgn0024277, FBgn0086899, FBgn0259678, FBgn0038947, FBgn0026192, FBgn0011771, FBgn0250789, FBgn0010341, FBgn0001965, FBgn0014001, FBgn0002121, FBgn0030749, FBgn0010382, FBgn0032859, FBgn0002789, FBgn0037028, FBgn0013759, FBgn0259212, FBgn0243516, FBgn0016700, FBgn0039532, FBgn0002921, FBgn0000384, FBgn00046…	0.00247012
GO:0051960	regulation of nervous system development	38	0.000107121	FBgn0041203, FBgn0003165, FBgn0024277, FBgn0004647, FBgn0024273, FBgn0038947, FBgn0010300, FBgn0003317, FBgn0250789, FBgn0003079, FBgn0010341, FBgn0014001, FBgn0002121, FBgn0250788, FBgn0259174, FBgn0030600, FBgn0003410, FBgn0031005, FBgn0000382, FBgn0002791, FBgn0259108, FBgn0011648, FBgn0035060, FBgn0016700, FBgn0028734, FBgn0013733, FBgn0029157, FBgn0004595, FBgn0086361, FBgn0014388, FBgn00160…	0.00261114
GO:0040008	regulation of growth	42	0.000110601	FBgn0041604, FBgn0004583, FBgn0011676, FBgn0032840, FBgn0027594, FBgn0003165, FBgn0020386, FBgn0001075, FBgn0004647, FBgn0024273, FBgn0004644, FBgn0024250, FBgn0037647, FBgn0021796, FBgn0003317, FBgn0026317, FBgn0250789, FBgn0003079, FBgn0002413, FBgn0029006, FBgn0250788, FBgn0036007, FBgn0030600, FBgn0037874, FBgn0086384, FBgn0002791, FBgn0259108, FBgn0011648, FBgn0038100, FBgn0035060, FBgn00051…	0.00267499
GO:0030036	actin cytoskeleton organization	54	0.000114294	FBgn0001139, FBgn0038294, FBgn0003475, FBgn0025641, FBgn0011771, FBgn0027605, FBgn0010341, FBgn0010303, FBgn0012051, FBgn0032859, FBgn0243516, FBgn0016700, FBgn0029157, FBgn0039924, FBgn0000723, FBgn0025455, FBgn0086906, FBgn0259243, FBgn0000667, FBgn0023172, FBgn0031781, FBgn0011661, FBgn0041203, FBgn0000256, FBgn0023081, FBgn0001250, FBgn0020386, FBgn0024277, FBgn0259678, FBgn0004647, FBgn00137…	0.00274297
GO:0048856	anatomical structure development	453	0.000116724	FBgn0250876, FBgn0033846, FBgn0003165, FBgn0020224, FBgn0001075, FBgn0013343, FBgn0033179, FBgn0001079, FBgn0003435, FBgn0004049, FBgn0023407, FBgn0001168, FBgn0035954, FBgn0000629, FBgn0243516, FBgn0035956, FBgn0003175, FBgn0029094, FBgn0087012, FBgn0004034, FBgn0003944, FBgn0004179, FBgn0023172, FBgn0001169, FBgn0026562, FBgn0000064, FBgn0028546, FBgn0015239, FBgn0033159, FBgn0020306, FBgn00203…	0.00277986
GO:0040007	growth	44	0.000124242	FBgn0000179, FBgn0041203, FBgn0000422, FBgn0032840, FBgn0040230, FBgn0033159, FBgn0000117, FBgn0001075, FBgn0004647, FBgn0011204, FBgn0086706, FBgn0003612, FBgn0004644, FBgn0002069, FBgn0011771, FBgn0021796, FBgn0000479, FBgn0002413, FBgn0010303, FBgn0036007, FBgn0003371, FBgn0002774, FBgn0024913, FBgn0032475, FBgn0259212, FBgn0039532, FBgn0001085, FBgn0011787, FBgn0010315, FBgn0000723, FBgn00411…	0.00293626
GO:0035220	wing disc development	93	0.000125954	FBgn0041604, FBgn0000179, FBgn0001981, FBgn0020224, FBgn0001075, FBgn0011224, FBgn0000139, FBgn0260003, FBgn0024250, FBgn0042641, FBgn0016917, FBgn0002413, FBgn0085432, FBgn0010341, FBgn0001987, FBgn0000083, FBgn0003371, FBgn0031005, FBgn0003130, FBgn0024846, FBgn0037700, FBgn0028427, FBgn0261268, FBgn0034876, FBgn0003175, FBgn0026323, FBgn0011826, FBgn0000289, FBgn0020521, FBgn0005410, FBgn00376…	0.00295432
GO:0060429	epithelium development	80	0.000143297	FBgn0001981, FBgn0020224, FBgn0001075, FBgn0026207, FBgn0026192, FBgn0004049, FBgn0002525, FBgn0002413, FBgn0010303, FBgn0010341, FBgn0014127, FBgn0010238, FBgn0010894, FBgn0001987, FBgn0005640, FBgn0000382, FBgn0001624, FBgn0044323, FBgn0000384, FBgn0026323, FBgn0011763, FBgn0026320, FBgn0000723, FBgn0014388, FBgn0015778, FBgn0023172, FBgn0043364, FBgn0011661, FBgn0028992, FBgn0041203, FBgn00002…	0.00333542
GO:0043038	amino acid activation	24	0.000144917	FBgn0051739, FBgn0039153, FBgn0036462, FBgn0034401, FBgn0035064, FBgn0010803, FBgn0036569, FBgn0039175, FBgn0027090, FBgn0027083, FBgn0002069, FBgn0030007, FBgn0027085, FBgn0027084, FBgn0030660, FBgn0053123, FBgn0027086, FBgn0027088, FBgn0036629, FBgn0000527, FBgn0028481, FBgn0028962, FBgn0027079, FBgn0036763	0.00334811
GO:0043484	regulation of RNA splicing	30	0.000146846	FBgn0004237, FBgn0017457, FBgn0001179, FBgn0005649, FBgn0039977, FBgn0031456, FBgn0039229, FBgn0014189, FBgn0067622, FBgn0000114, FBgn0032240, FBgn0086895, FBgn0020306, FBgn0028474, FBgn0016978, FBgn0035235, FBgn0029094, FBgn0000662, FBgn0039182, FBgn0040286, FBgn0035872, FBgn0036828, FBgn0015907, FBgn0037344, FBgn0004838, FBgn0030631, FBgn0003659, FBgn0000330, FBgn0259220, FBgn0037220, FBgn00102…	0.00336769
GO:0048024	regulation of nuclear mRNA splicing, via spliceosome	29	0.000149641	FBgn0004237, FBgn0017457, FBgn0001179, FBgn0005649, FBgn0039977, FBgn0031456, FBgn0039229, FBgn0014189, FBgn0067622, FBgn0000114, FBgn0032240, FBgn0086895, FBgn0020306, FBgn0028474, FBgn0016978, FBgn0035235, FBgn0029094, FBgn0000662, FBgn0039182, FBgn0040286, FBgn0035872, FBgn0036828, FBgn0015907, FBgn0037344, FBgn0004838, FBgn0030631, FBgn0003659, FBgn0000330, FBgn0259220, FBgn0037220	0.00340669
GO:0050684	regulation of mRNA processing	29	0.000149641	FBgn0004237, FBgn0017457, FBgn0001179, FBgn0005649, FBgn0039977, FBgn0031456, FBgn0039229, FBgn0014189, FBgn0067622, FBgn0000114, FBgn0032240, FBgn0086895, FBgn0020306, FBgn0028474, FBgn0016978, FBgn0035235, FBgn0029094, FBgn0000662, FBgn0039182, FBgn0040286, FBgn0035872, FBgn0036828, FBgn0015907, FBgn0037344, FBgn0004838, FBgn0030631, FBgn0003659, FBgn0000330, FBgn0259220, FBgn0037220	0.00340669
GO:0044248	cellular catabolic process	116	0.000151903	FBgn0029996, FBgn0010288, FBgn0034366, FBgn0039632, FBgn0040230, FBgn0034989, FBgn0003165, FBgn0024732, FBgn0027914, FBgn0031868, FBgn0039025, FBgn0028476, FBgn0029006, FBgn0032596, FBgn0031693, FBgn0037873, FBgn0034410, FBgn0032296, FBgn0002791, FBgn0029113, FBgn0261268, FBgn0010100, FBgn0030863, FBgn0032210, FBgn0036534, FBgn0086134, FBgn0035811, FBgn0030969, FBgn0032216, FBgn0041174, FBgn00392…	0.00343308
GO:0000902	cell morphogenesis	136	0.00015251	FBgn0041604, FBgn0250876, FBgn0003165, FBgn0020224, FBgn0014163, FBgn0001075, FBgn0003435, FBgn0002526, FBgn0027605, FBgn0002413, FBgn0010303, FBgn0010280, FBgn0030330, FBgn0001168, FBgn0259108, FBgn0013759, FBgn0000629, FBgn0261268, FBgn0015014, FBgn0035754, FBgn0029094, FBgn0014388, FBgn0010109, FBgn0035357, FBgn0086655, FBgn0028992, FBgn0086680, FBgn0004606, FBgn0001250, FBgn0020388, FBgn00331…	0.00342204
GO:0045449	regulation of transcription	228	0.000171614	FBgn0029504, FBgn0013746, FBgn0004567, FBgn0033846, FBgn0034012, FBgn0032940, FBgn0003165, FBgn0000448, FBgn0042696, FBgn0001079, FBgn0037445, FBgn0010303, FBgn0038903, FBgn0034410, FBgn0037540, FBgn0001168, FBgn0035954, FBgn0000629, FBgn0033029, FBgn0013753, FBgn0035956, FBgn0029094, FBgn0000439, FBgn0005410, FBgn0010109, FBgn0037657, FBgn0003944, FBgn0051390, FBgn0035295, FBgn0030093, FBgn00866…	0.00382245
GO:0046903	secretion	48	0.000184606	FBgn0000257, FBgn0030089, FBgn0031454, FBgn0013749, FBgn0028582, FBgn0000346, FBgn0026634, FBgn0039132, FBgn0005586, FBgn0031537, FBgn0013726, FBgn0013343, FBgn0027103, FBgn0029088, FBgn0013997, FBgn0003008, FBgn0250789, FBgn0039774, FBgn0002121, FBgn0250788, FBgn0015816, FBgn0026378, FBgn0031450, FBgn0053653, FBgn0004574, FBgn0013759, FBgn0027505, FBgn0004242, FBgn0016700, FBgn0035060, FBgn00112…	0.00408216
GO:0009059	macromolecule biosynthetic process	316	0.00019225	FBgn0037743, FBgn0001179, FBgn0004567, FBgn0022936, FBgn0033846, FBgn0034012, FBgn0052099, FBgn0010803, FBgn0000448, FBgn0042696, FBgn0039175, FBgn0035558, FBgn0010300, FBgn0030662, FBgn0030660, FBgn0032698, FBgn0038601, FBgn0038903, FBgn0034410, FBgn0037540, FBgn0001168, FBgn0037141, FBgn0000629, FBgn0037249, FBgn0033029, FBgn0029906, FBgn0029094, FBgn0044510, FBgn0027296, FBgn0000439, FBgn00101…	0.00422098
GO:0009057	macromolecule catabolic process	91	0.000200564	FBgn0029996, FBgn0010288, FBgn0030674, FBgn0032467, FBgn0039632, FBgn0030809, FBgn0040230, FBgn0034989, FBgn0003165, FBgn0024732, FBgn0031107, FBgn0050421, FBgn0027914, FBgn0031868, FBgn0039025, FBgn0028476, FBgn0029006, FBgn0026316, FBgn0039875, FBgn0023444, FBgn0032596, FBgn0035136, FBgn0000173, FBgn0034410, FBgn0044419, FBgn0032296, FBgn0002791, FBgn0037707, FBgn0029113, FBgn0013717, FBgn02612…	0.00437241
GO:0006082	organic acid metabolic process	89	0.000208751	FBgn0001941, FBgn0051075, FBgn0039635, FBgn0041607, FBgn0010803, FBgn0033883, FBgn0003189, FBgn0022774, FBgn0039175, FBgn0032603, FBgn0037610, FBgn0039877, FBgn0030660, FBgn0040001, FBgn0016013, FBgn0004087, FBgn0031824, FBgn0037873, FBgn0004901, FBgn0085384, FBgn0051739, FBgn0064126, FBgn0052068, FBgn0051522, FBgn0034067, FBgn0036462, FBgn0001125, FBgn0037697, FBgn0035064, FBgn0037146, FBgn00358…	0.00451896
GO:0019752	carboxylic acid metabolic process	89	0.000208751	FBgn0001941, FBgn0051075, FBgn0039635, FBgn0041607, FBgn0010803, FBgn0033883, FBgn0003189, FBgn0022774, FBgn0039175, FBgn0032603, FBgn0037610, FBgn0039877, FBgn0030660, FBgn0040001, FBgn0016013, FBgn0004087, FBgn0031824, FBgn0037873, FBgn0004901, FBgn0085384, FBgn0051739, FBgn0064126, FBgn0052068, FBgn0051522, FBgn0034067, FBgn0036462, FBgn0001125, FBgn0037697, FBgn0035064, FBgn0037146, FBgn00358…	0.00451896
GO:0043436	oxoacid metabolic process	89	0.000208751	FBgn0001941, FBgn0051075, FBgn0039635, FBgn0041607, FBgn0010803, FBgn0033883, FBgn0003189, FBgn0022774, FBgn0039175, FBgn0032603, FBgn0037610, FBgn0039877, FBgn0030660, FBgn0040001, FBgn0016013, FBgn0004087, FBgn0031824, FBgn0037873, FBgn0004901, FBgn0085384, FBgn0051739, FBgn0064126, FBgn0052068, FBgn0051522, FBgn0034067, FBgn0036462, FBgn0001125, FBgn0037697, FBgn0035064, FBgn0037146, FBgn00358…	0.00451896
GO:0018130	heterocycle biosynthetic process	28	0.000212436	FBgn0000257, FBgn0003210, FBgn0000422, FBgn0036271, FBgn0020018, FBgn0037138, FBgn0030407, FBgn0030066, FBgn0015781, FBgn0003515, FBgn0003008, FBgn0000109, FBgn0037942, FBgn0026602, FBgn0001087, FBgn0000247, FBgn0000316, FBgn0002567, FBgn0002566, FBgn0037146, FBgn0032054, FBgn0000482, FBgn0033428, FBgn0010786, FBgn0086679, FBgn0000330, FBgn0021944, FBgn0023536	0.00456691
GO:0008356	asymmetric cell division	27	0.000215595	FBgn0011674, FBgn0011207, FBgn0003165, FBgn0000117, FBgn0000114, FBgn0004647, FBgn0024273, FBgn0004644, FBgn0010300, FBgn0003317, FBgn0016917, FBgn0011020, FBgn0010382, FBgn0040080, FBgn0051232, FBgn0011648, FBgn0015754, FBgn0004872, FBgn0011666, FBgn0001085, FBgn0015772, FBgn0021760, FBgn0000146, FBgn0004595, FBgn0004837, FBgn0039016, FBgn0000163	0.004603
GO:0044087	regulation of cellular component biogenesis	34	0.000230138	FBgn0002736, FBgn0003687, FBgn0023081, FBgn0003165, FBgn0011836, FBgn0013343, FBgn0024273, FBgn0034650, FBgn0261014, FBgn0041161, FBgn0003317, FBgn0250789, FBgn0250788, FBgn0259174, FBgn0032859, FBgn0030600, FBgn0033378, FBgn0015790, FBgn0004574, FBgn0002791, FBgn0259108, FBgn0011648, FBgn0003721, FBgn0035060, FBgn0004242, FBgn0001085, FBgn0028734, FBgn0000146, FBgn0029157, FBgn0003502, FBgn00048…	0.00487944
GO:0034645	cellular macromolecule biosynthetic process	314	0.000234928	FBgn0037743, FBgn0001179, FBgn0004567, FBgn0022936, FBgn0033846, FBgn0034012, FBgn0010803, FBgn0000448, FBgn0042696, FBgn0039175, FBgn0035558, FBgn0010300, FBgn0030662, FBgn0030660, FBgn0032698, FBgn0038601, FBgn0038903, FBgn0034410, FBgn0037540, FBgn0001168, FBgn0037141, FBgn0000629, FBgn0037249, FBgn0033029, FBgn0029906, FBgn0029094, FBgn0044510, FBgn0027296, FBgn0000439, FBgn0010109, FBgn00039…	0.0049472
GO:0006519	cellular amino acid and derivative metabolic process	69	0.000238813	FBgn0041607, FBgn0010803, FBgn0003189, FBgn0000303, FBgn0022774, FBgn0039175, FBgn0037610, FBgn0039877, FBgn0030660, FBgn0016013, FBgn0004087, FBgn0031824, FBgn0004901, FBgn0085384, FBgn0051739, FBgn0052068, FBgn0064126, FBgn0034067, FBgn0036462, FBgn0001125, FBgn0037697, FBgn0035064, FBgn0019932, FBgn0037146, FBgn0027090, FBgn0027083, FBgn0003423, FBgn0004034, FBgn0027085, FBgn0037305, FBgn00270…	0.00499513
GO:0051651	maintenance of location in cell	19	0.000250007	FBgn0260442, FBgn0024227, FBgn0020440, FBgn0028427, FBgn0027508, FBgn0011016, FBgn0000405, FBgn0021760, FBgn0000117, FBgn0011692, FBgn0021795, FBgn0043884, FBgn0086356, FBgn0000667, FBgn0011747, FBgn0041789, FBgn0010215, FBgn0004379, FBgn0010247	0.00519394
GO:0048569	post-embryonic organ development	96	0.000252743	FBgn0041604, FBgn0000179, FBgn0026597, FBgn0010389, FBgn0026411, FBgn0001981, FBgn0020224, FBgn0001075, FBgn0011224, FBgn0000139, FBgn0082585, FBgn0260003, FBgn0024250, FBgn0042641, FBgn0016917, FBgn0002413, FBgn0085432, FBgn0010303, FBgn0010341, FBgn0003129, FBgn0001987, FBgn0003371, FBgn0031005, FBgn0003130, FBgn0024846, FBgn0001624, FBgn0028427, FBgn0261268, FBgn0034876, FBgn0003175, FBgn00263…	0.00521594
GO:0042180	cellular ketone metabolic process	94	0.000264745	FBgn0001941, FBgn0029502, FBgn0051075, FBgn0039635, FBgn0041607, FBgn0010803, FBgn0033883, FBgn0003189, FBgn0022774, FBgn0039175, FBgn0032603, FBgn0037610, FBgn0039877, FBgn0030660, FBgn0040001, FBgn0016013, FBgn0004087, FBgn0031824, FBgn0037873, FBgn0004901, FBgn0085384, FBgn0051739, FBgn0064126, FBgn0052068, FBgn0051522, FBgn0034067, FBgn0036462, FBgn0001125, FBgn0037697, FBgn0035064, FBgn00371…	0.00542714
GO:0001505	regulation of neurotransmitter levels	43	0.000271366	FBgn0030089, FBgn0031454, FBgn0013749, FBgn0028582, FBgn0010329, FBgn0000346, FBgn0039132, FBgn0005586, FBgn0031537, FBgn0013343, FBgn0000303, FBgn0027103, FBgn0003008, FBgn0013997, FBgn0250789, FBgn0039774, FBgn0002121, FBgn0250788, FBgn0005626, FBgn0026378, FBgn0031450, FBgn0053653, FBgn0004574, FBgn0013759, FBgn0027505, FBgn0035060, FBgn0004242, FBgn0011288, FBgn0033876, FBgn0034913, FBgn00287…	0.00552625
GO:0007265	Ras protein signal transduction	16	0.000273927	FBgn0015000, FBgn0035089, FBgn0259212, FBgn0004638, FBgn0024555, FBgn0024277, FBgn0021818, FBgn0015778, FBgn0086356, FBgn0026181, FBgn0028487, FBgn0085403, FBgn0014001, FBgn0010398, FBgn0001965, FBgn0003118	0.00554216
GO:0002009	morphogenesis of an epithelium	76	0.000280818	FBgn0001981, FBgn0020224, FBgn0001075, FBgn0026207, FBgn0026192, FBgn0004049, FBgn0002525, FBgn0002413, FBgn0010303, FBgn0010341, FBgn0014127, FBgn0010238, FBgn0005640, FBgn0000382, FBgn0001624, FBgn0044323, FBgn0000384, FBgn0026323, FBgn0011763, FBgn0026320, FBgn0000723, FBgn0014388, FBgn0015778, FBgn0023172, FBgn0043364, FBgn0011661, FBgn0028992, FBgn0041203, FBgn0000221, FBgn0015286, FBgn00001…	0.00564465
GO:0048729	tissue morphogenesis	82	0.000295513	FBgn0010389, FBgn0001981, FBgn0020224, FBgn0001075, FBgn0026207, FBgn0026192, FBgn0004049, FBgn0002525, FBgn0002413, FBgn0085432, FBgn0010303, FBgn0010341, FBgn0014127, FBgn0010238, FBgn0005640, FBgn0000382, FBgn0001624, FBgn0044323, FBgn0000384, FBgn0026323, FBgn0011763, FBgn0026320, FBgn0000723, FBgn0011723, FBgn0014388, FBgn0015778, FBgn0003944, FBgn0023172, FBgn0043364, FBgn0011661, FBgn00289…	0.00590123
GO:0006418	tRNA aminoacylation for protein translation	23	0.000306846	FBgn0051739, FBgn0039153, FBgn0036462, FBgn0034401, FBgn0035064, FBgn0010803, FBgn0036569, FBgn0039175, FBgn0027090, FBgn0027083, FBgn0002069, FBgn0030007, FBgn0027085, FBgn0027084, FBgn0030660, FBgn0053123, FBgn0027086, FBgn0027088, FBgn0036629, FBgn0028481, FBgn0028962, FBgn0027079, FBgn0036763	0.00608798
GO:0043039	tRNA aminoacylation	23	0.000306846	FBgn0051739, FBgn0039153, FBgn0036462, FBgn0034401, FBgn0035064, FBgn0010803, FBgn0036569, FBgn0039175, FBgn0027090, FBgn0027083, FBgn0002069, FBgn0030007, FBgn0027085, FBgn0027084, FBgn0030660, FBgn0053123, FBgn0027086, FBgn0027088, FBgn0036629, FBgn0028481, FBgn0028962, FBgn0027079, FBgn0036763	0.00608798
GO:0006468	protein amino acid phosphorylation	85	0.000345031	FBgn0031696, FBgn0015664, FBgn0010389, FBgn0038588, FBgn0039306, FBgn0001079, FBgn0029891, FBgn0002413, FBgn0010303, FBgn0037218, FBgn0031860, FBgn0260935, FBgn0003091, FBgn0005640, FBgn0003371, FBgn0024227, FBgn0259680, FBgn0013759, FBgn0024846, FBgn0028427, FBgn0037491, FBgn0039623, FBgn0015772, FBgn0026323, FBgn0053531, FBgn0261360, FBgn0025702, FBgn0031643, FBgn0000723, FBgn0000489, FBgn00007…	0.00679995
GO:0046530	photoreceptor cell differentiation	48	0.000349331	FBgn0004583, FBgn0000117, FBgn0261397, FBgn0003310, FBgn0004647, FBgn0013726, FBgn0033179, FBgn0004644, FBgn0043884, FBgn0086911, FBgn0011758, FBgn0040294, FBgn0001965, FBgn0001297, FBgn0000173, FBgn0027053, FBgn0003410, FBgn0000320, FBgn0086384, FBgn0000382, FBgn0000313, FBgn0001168, FBgn0015790, FBgn0001316, FBgn0003053, FBgn0000210, FBgn0026252, FBgn0044323, FBgn0000414, FBgn0023489, FBgn00010…	0.00684128
GO:0048468	cell development	225	0.000356455	FBgn0250876, FBgn0027538, FBgn0033846, FBgn0003165, FBgn0020224, FBgn0001075, FBgn0033179, FBgn0003435, FBgn0041161, FBgn0010303, FBgn0034155, FBgn0259108, FBgn0044323, FBgn0000629, FBgn0029094, FBgn0014388, FBgn0010109, FBgn0259243, FBgn0023172, FBgn0086655, FBgn0086680, FBgn0033159, FBgn0031537, FBgn0024277, FBgn0024273, FBgn0003450, FBgn0004167, FBgn0000320, FBgn0000313, FBgn0051232, FBgn00030…	0.00693686
GO:0048518	positive regulation of biological process	109	0.000358849	FBgn0041604, FBgn0010389, FBgn0032840, FBgn0001276, FBgn0003165, FBgn0039403, FBgn0011836, FBgn0000139, FBgn0027609, FBgn0037647, FBgn0038046, FBgn0002413, FBgn0032698, FBgn0042085, FBgn0010280, FBgn0010382, FBgn0037874, FBgn0044323, FBgn0013753, FBgn0038578, FBgn0014018, FBgn0015014, FBgn0000146, FBgn0000439, FBgn0005410, FBgn0003944, FBgn0000568, FBgn0037657, FBgn0045073, FBgn0030093, FBgn00001…	0.00694007
GO:0008360	regulation of cell shape	39	0.000364382	FBgn0014006, FBgn0027515, FBgn0010389, FBgn0020440, FBgn0001250, FBgn0000117, FBgn0086899, FBgn0259678, FBgn0026192, FBgn0011771, FBgn0250789, FBgn0010341, FBgn0001965, FBgn0014001, FBgn0002121, FBgn0030749, FBgn0010382, FBgn0032859, FBgn0002789, FBgn0037028, FBgn0013759, FBgn0259212, FBgn0243516, FBgn0016700, FBgn0039532, FBgn0002921, FBgn0000384, FBgn0004638, FBgn0004828, FBgn0015794, FBgn00275…	0.00700336
GO:0048522	positive regulation of cellular process	99	0.000368906	FBgn0041604, FBgn0010389, FBgn0001276, FBgn0003165, FBgn0039403, FBgn0011836, FBgn0000139, FBgn0027609, FBgn0037647, FBgn0038046, FBgn0002413, FBgn0032698, FBgn0010280, FBgn0042085, FBgn0010382, FBgn0044323, FBgn0013753, FBgn0014018, FBgn0038578, FBgn0015014, FBgn0000146, FBgn0000439, FBgn0005410, FBgn0000568, FBgn0037657, FBgn0030093, FBgn0000117, FBgn0020386, FBgn0000114, FBgn0259678, FBgn00351…	0.00704668
GO:0032502	developmental process	581	0.000371778	FBgn0250876, FBgn0033846, FBgn0003165, FBgn0020224, FBgn0001075, FBgn0013343, FBgn0033179, FBgn0029088, FBgn0001079, FBgn0003435, FBgn0004049, FBgn0023407, FBgn0001168, FBgn0035954, FBgn0000629, FBgn0243516, FBgn0035956, FBgn0003175, FBgn0029094, FBgn0087012, FBgn0002174, FBgn0004034, FBgn0003944, FBgn0004179, FBgn0002031, FBgn0023172, FBgn0023179, FBgn0023511, FBgn0001169, FBgn0026562, FBgn00000…	0.00705821
GO:0007472	wing disc morphogenesis	74	0.000391964	FBgn0041604, FBgn0000179, FBgn0020224, FBgn0001075, FBgn0011224, FBgn0000139, FBgn0260003, FBgn0024250, FBgn0042641, FBgn0016917, FBgn0002413, FBgn0085432, FBgn0010341, FBgn0001987, FBgn0003371, FBgn0031005, FBgn0003130, FBgn0024846, FBgn0028427, FBgn0261268, FBgn0034876, FBgn0026323, FBgn0003175, FBgn0000289, FBgn0005410, FBgn0020521, FBgn0037657, FBgn0000489, FBgn0001123, FBgn0000242, FBgn00368…	0.00739516
GO:0030182	neuron differentiation	125	0.000392463	FBgn0041604, FBgn0250876, FBgn0003165, FBgn0014163, FBgn0033179, FBgn0003435, FBgn0002526, FBgn0010303, FBgn0010280, FBgn0030330, FBgn0001168, FBgn0259108, FBgn0000629, FBgn0044323, FBgn0261268, FBgn0023489, FBgn0015014, FBgn0035754, FBgn0029094, FBgn0003654, FBgn0010109, FBgn0005619, FBgn0035357, FBgn0086655, FBgn0086680, FBgn0004583, FBgn0004606, FBgn0001250, FBgn0085450, FBgn0020388, FBgn00331…	0.0073601
GO:0022610	biological adhesion	65	0.000404005	FBgn0001075, FBgn0037963, FBgn0260004, FBgn0002526, FBgn0026192, FBgn0038181, FBgn0010238, FBgn0010382, FBgn0025697, FBgn0010435, FBgn0013759, FBgn0001624, FBgn0028427, FBgn0038439, FBgn0016700, FBgn0027562, FBgn0053531, FBgn0039928, FBgn0004828, FBgn0039924, FBgn0058006, FBgn0035290, FBgn0000180, FBgn0259240, FBgn0045073, FBgn0261261, FBgn0026562, FBgn0027515, FBgn0000221, FBgn0024753, FBgn00012…	0.00753059
GO:0007424	open tracheal system development	55	0.000415909	FBgn0001981, FBgn0025641, FBgn0026207, FBgn0002525, FBgn0016917, FBgn0085432, FBgn0014127, FBgn0010894, FBgn0010238, FBgn0001987, FBgn0000382, FBgn0001168, FBgn0002921, FBgn0015014, FBgn0003525, FBgn0020521, FBgn0014388, FBgn0041174, FBgn0003944, FBgn0004858, FBgn0023458, FBgn0023172, FBgn0027363, FBgn0086655, FBgn0086680, FBgn0001250, FBgn0015239, FBgn0000117, FBgn0003310, FBgn0031537, FBgn00387…	0.0077057
GO:0060541	respiratory system development	55	0.000415909	FBgn0001981, FBgn0025641, FBgn0026207, FBgn0002525, FBgn0016917, FBgn0085432, FBgn0014127, FBgn0010894, FBgn0010238, FBgn0001987, FBgn0000382, FBgn0001168, FBgn0002921, FBgn0015014, FBgn0003525, FBgn0020521, FBgn0014388, FBgn0041174, FBgn0003944, FBgn0004858, FBgn0023458, FBgn0023172, FBgn0027363, FBgn0086655, FBgn0086680, FBgn0001250, FBgn0015239, FBgn0000117, FBgn0003310, FBgn0031537, FBgn00387…	0.0077057
GO:0007269	neurotransmitter secretion	40	0.000428085	FBgn0030089, FBgn0031454, FBgn0013749, FBgn0028582, FBgn0000346, FBgn0039132, FBgn0005586, FBgn0031537, FBgn0013343, FBgn0027103, FBgn0003008, FBgn0013997, FBgn0250789, FBgn0039774, FBgn0002121, FBgn0250788, FBgn0026378, FBgn0031450, FBgn0053653, FBgn0004574, FBgn0013759, FBgn0027505, FBgn0035060, FBgn0004242, FBgn0011288, FBgn0033876, FBgn0034913, FBgn0028734, FBgn0040285, FBgn0015614, FBgn00392…	0.0078837
GO:0009968	negative regulation of signal transduction	40	0.000428085	FBgn0026597, FBgn0028546, FBgn0001139, FBgn0039110, FBgn0015024, FBgn0015286, FBgn0085450, FBgn0020224, FBgn0001075, FBgn0004647, FBgn0003612, FBgn0024250, FBgn0027932, FBgn0020309, FBgn0086356, FBgn0026317, FBgn0005355, FBgn0003317, FBgn0016917, FBgn0085432, FBgn0041100, FBgn0002121, FBgn0259174, FBgn0040206, FBgn0031450, FBgn0030600, FBgn0023423, FBgn0003371, FBgn0003053, FBgn0005198, FBgn00112…	0.0078837
GO:0048736	appendage development	81	0.000430576	FBgn0041604, FBgn0000179, FBgn0026411, FBgn0020224, FBgn0001075, FBgn0011224, FBgn0000139, FBgn0013343, FBgn0260003, FBgn0024250, FBgn0042641, FBgn0016917, FBgn0002413, FBgn0085432, FBgn0010341, FBgn0001987, FBgn0003371, FBgn0261238, FBgn0031005, FBgn0003130, FBgn0024846, FBgn0028427, FBgn0261268, FBgn0034876, FBgn0003175, FBgn0000289, FBgn0020521, FBgn0005410, FBgn0003944, FBgn0037657, FBgn00048…	0.00788293
GO:0006357	regulation of transcription from RNA polymerase II promoter	66	0.000434242	FBgn0015664, FBgn0001139, FBgn0003687, FBgn0033846, FBgn0038872, FBgn0001276, FBgn0001981, FBgn0011836, FBgn0024491, FBgn0034650, FBgn0040273, FBgn0003339, FBgn0024250, FBgn0002522, FBgn0010303, FBgn0013799, FBgn0036581, FBgn0010280, FBgn0028974, FBgn0001168, FBgn0013753, FBgn0038578, FBgn0014018, FBgn0015014, FBgn0004896, FBgn0004656, FBgn0035754, FBgn0005410, FBgn0011763, FBgn0010109, FBgn00047…	0.00790349
GO:0032446	protein modification by small protein conjugation	23	0.000443863	FBgn0029996, FBgn0261112, FBgn0032467, FBgn0029113, FBgn0030809, FBgn0036546, FBgn0025638, FBgn0031107, FBgn0086442, FBgn0086694, FBgn0027609, FBgn0041174, FBgn0035853, FBgn0027936, FBgn0029006, FBgn0041100, FBgn0259174, FBgn0035136, FBgn0000173, FBgn0030600, FBgn0034410, FBgn0003410, FBgn0044020	0.00803116
GO:0048737	imaginal disc-derived appendage development	80	0.00047135	FBgn0041604, FBgn0000179, FBgn0026411, FBgn0020224, FBgn0001075, FBgn0011224, FBgn0000139, FBgn0013343, FBgn0260003, FBgn0024250, FBgn0042641, FBgn0016917, FBgn0002413, FBgn0085432, FBgn0010341, FBgn0001987, FBgn0003371, FBgn0261238, FBgn0031005, FBgn0003130, FBgn0024846, FBgn0028427, FBgn0261268, FBgn0034876, FBgn0003175, FBgn0000289, FBgn0020521, FBgn0005410, FBgn0003944, FBgn0037657, FBgn00048…	0.00847741
GO:0007476	imaginal disc-derived wing morphogenesis	73	0.000498569	FBgn0041604, FBgn0000179, FBgn0020224, FBgn0001075, FBgn0011224, FBgn0000139, FBgn0260003, FBgn0024250, FBgn0042641, FBgn0002413, FBgn0016917, FBgn0085432, FBgn0010341, FBgn0001987, FBgn0003371, FBgn0031005, FBgn0003130, FBgn0024846, FBgn0028427, FBgn0261268, FBgn0034876, FBgn0003175, FBgn0000289, FBgn0005410, FBgn0020521, FBgn0037657, FBgn0000489, FBgn0001123, FBgn0000242, FBgn0036801, FBgn00866…	0.00891358
GO:0035120	post-embryonic appendage morphogenesis	76	0.000509099	FBgn0041604, FBgn0000179, FBgn0026411, FBgn0020224, FBgn0001075, FBgn0011224, FBgn0000139, FBgn0260003, FBgn0024250, FBgn0042641, FBgn0002413, FBgn0016917, FBgn0085432, FBgn0010341, FBgn0001987, FBgn0003371, FBgn0031005, FBgn0003130, FBgn0024846, FBgn0028427, FBgn0261268, FBgn0034876, FBgn0003175, FBgn0000289, FBgn0005410, FBgn0020521, FBgn0037657, FBgn0003944, FBgn0000489, FBgn0001123, FBgn00002…	0.00904926
GO:0007560	imaginal disc morphogenesis	91	0.00051373	FBgn0041604, FBgn0000179, FBgn0026597, FBgn0026411, FBgn0001981, FBgn0020224, FBgn0001075, FBgn0011224, FBgn0000139, FBgn0260003, FBgn0024250, FBgn0042641, FBgn0016917, FBgn0002413, FBgn0085432, FBgn0010303, FBgn0010341, FBgn0001987, FBgn0003371, FBgn0031005, FBgn0003130, FBgn0024846, FBgn0001624, FBgn0028427, FBgn0261268, FBgn0034876, FBgn0003175, FBgn0026323, FBgn0000289, FBgn0020521, FBgn00054…	0.00907958
GO:0048563	post-embryonic organ morphogenesis	91	0.00051373	FBgn0041604, FBgn0000179, FBgn0026597, FBgn0026411, FBgn0001981, FBgn0020224, FBgn0001075, FBgn0011224, FBgn0000139, FBgn0260003, FBgn0024250, FBgn0042641, FBgn0016917, FBgn0002413, FBgn0085432, FBgn0010303, FBgn0010341, FBgn0001987, FBgn0003371, FBgn0031005, FBgn0003130, FBgn0024846, FBgn0001624, FBgn0028427, FBgn0261268, FBgn0034876, FBgn0003175, FBgn0026323, FBgn0000289, FBgn0020521, FBgn00054…	0.00907958
GO:0003001	generation of a signal involved in cell-cell signaling	40	0.000537464	FBgn0030089, FBgn0031454, FBgn0013749, FBgn0028582, FBgn0000346, FBgn0039132, FBgn0005586, FBgn0031537, FBgn0013343, FBgn0027103, FBgn0003008, FBgn0013997, FBgn0250789, FBgn0039774, FBgn0002121, FBgn0250788, FBgn0026378, FBgn0031450, FBgn0053653, FBgn0004574, FBgn0013759, FBgn0027505, FBgn0035060, FBgn0004242, FBgn0011288, FBgn0033876, FBgn0034913, FBgn0028734, FBgn0040285, FBgn0015614, FBgn00392…	0.00944376
GO:0010648	negative regulation of cell communication	40	0.000537464	FBgn0026597, FBgn0028546, FBgn0001139, FBgn0039110, FBgn0015024, FBgn0015286, FBgn0085450, FBgn0020224, FBgn0001075, FBgn0004647, FBgn0003612, FBgn0024250, FBgn0027932, FBgn0020309, FBgn0086356, FBgn0026317, FBgn0005355, FBgn0003317, FBgn0016917, FBgn0085432, FBgn0041100, FBgn0002121, FBgn0259174, FBgn0040206, FBgn0031450, FBgn0030600, FBgn0023423, FBgn0003371, FBgn0003053, FBgn0005198, FBgn00112…	0.00944376
GO:0051236	establishment of RNA localization	28	0.000544833	FBgn0002736, FBgn0030674, FBgn0026634, FBgn0031456, FBgn0014189, FBgn0026207, FBgn0039004, FBgn0038950, FBgn0016070, FBgn0015277, FBgn0028974, FBgn0033378, FBgn0033380, FBgn0034939, FBgn0020497, FBgn0038722, FBgn0036184, FBgn0002566, FBgn0033316, FBgn0015795, FBgn0003321, FBgn0087035, FBgn0038810, FBgn0039016, FBgn0027779, FBgn0003891, FBgn0034794, FBgn0001404	0.00951913
GO:0048489	synaptic vesicle transport	36	0.000574332	FBgn0030089, FBgn0031454, FBgn0003210, FBgn0013749, FBgn0028582, FBgn0000346, FBgn0039132, FBgn0031537, FBgn0013343, FBgn0027103, FBgn0003008, FBgn0013997, FBgn0039774, FBgn0037218, FBgn0002121, FBgn0026479, FBgn0031450, FBgn0034155, FBgn0053653, FBgn0004574, FBgn0013759, FBgn0035060, FBgn0004242, FBgn0011288, FBgn0033876, FBgn0040285, FBgn0040281, FBgn0053094, FBgn0013750, FBgn0004179, FBgn00003…	0.00997632
GO:0000226	microtubule cytoskeleton organization	94	0.000735737	FBgn0031696, FBgn0015664, FBgn0002914, FBgn0011674, FBgn0024689, FBgn0040235, FBgn0031452, FBgn0032987, FBgn0040232, FBgn0000405, FBgn0035692, FBgn0035489, FBgn0039731, FBgn0021825, FBgn0028662, FBgn0030067, FBgn0040273, FBgn0028902, FBgn0027783, FBgn0015391, FBgn0039206, FBgn0041161, FBgn0033718, FBgn0036314, FBgn0014127, FBgn0003884, FBgn0019968, FBgn0040080, FBgn0033378, FBgn0024227, FBgn00204…	0.0126926
GO:0050807	regulation of synapse organization	16	0.000757319	FBgn0015790, FBgn0259108, FBgn0011648, FBgn0002791, FBgn0035060, FBgn0040230, FBgn0003165, FBgn0028734, FBgn0024273, FBgn0003317, FBgn0250789, FBgn0015803, FBgn0259174, FBgn0250788, FBgn0086676, FBgn0030600	0.0129909
GO:0048666	neuron development	107	0.000760398	FBgn0041604, FBgn0250876, FBgn0003165, FBgn0014163, FBgn0033179, FBgn0003435, FBgn0002526, FBgn0010303, FBgn0010280, FBgn0030330, FBgn0259108, FBgn0000629, FBgn0044323, FBgn0261268, FBgn0023489, FBgn0015014, FBgn0035754, FBgn0029094, FBgn0010109, FBgn0005619, FBgn0035357, FBgn0086655, FBgn0086680, FBgn0004606, FBgn0001250, FBgn0085450, FBgn0020388, FBgn0033159, FBgn0261397, FBgn0024277, FBgn00362…	0.0129722
GO:0012501	programmed cell death	54	0.000776897	FBgn0033988, FBgn0034366, FBgn0024732, FBgn0027609, FBgn0027885, FBgn0024252, FBgn0033935, FBgn0035136, FBgn0003882, FBgn0086378, FBgn0025697, FBgn0010435, FBgn0037700, FBgn0026323, FBgn0011763, FBgn0000568, FBgn0036974, FBgn0000565, FBgn0015247, FBgn0053193, FBgn0043364, FBgn0046687, FBgn0014006, FBgn0028360, FBgn0015239, FBgn0036237, FBgn0000117, FBgn0020386, FBgn0004647, FBgn0013726, FBgn00203…	0.01318
GO:0030071	regulation of mitotic metaphase/anaphase transition	13	0.000809169	FBgn0031696, FBgn0000063, FBgn0025781, FBgn0000404, FBgn0031107, FBgn0003268, FBgn0004643, FBgn0035640, FBgn0061476, FBgn0003884, FBgn0004889, FBgn0030600, FBgn0034231	0.0136498
GO:0033059	cellular pigmentation	8	0.000816299	FBgn0000257, FBgn0003210, FBgn0011758, FBgn0001087, FBgn0000247, FBgn0002567, FBgn0000482, FBgn0085408	0.0136954
GO:0048753	pigment granule organization	8	0.000816299	FBgn0000257, FBgn0003210, FBgn0011758, FBgn0001087, FBgn0000247, FBgn0002567, FBgn0000482, FBgn0085408	0.0136954
GO:0048488	synaptic vesicle endocytosis	18	0.000868076	FBgn0030089, FBgn0003210, FBgn0013749, FBgn0028582, FBgn0004242, FBgn0035060, FBgn0039132, FBgn0003008, FBgn0053094, FBgn0013750, FBgn0037218, FBgn0004179, FBgn0000330, FBgn0026479, FBgn0086676, FBgn0016975, FBgn0027363, FBgn0030230	0.0144804
GO:0006281	DNA repair	39	0.000903575	FBgn0004584, FBgn0001179, FBgn0035766, FBgn0031399, FBgn0015024, FBgn0038704, FBgn0033273, FBgn0027914, FBgn0002872, FBgn0026869, FBgn0028434, FBgn0030931, FBgn0015553, FBgn0027378, FBgn0030646, FBgn0034728, FBgn0043002, FBgn0025808, FBgn0037141, FBgn0036843, FBgn0040268, FBgn0037202, FBgn0020270, FBgn0015546, FBgn0034976, FBgn0261109, FBgn0037301, FBgn0002905, FBgn0024555, FBgn0002906, FBgn00046…	0.0149884
GO:0016072	rRNA metabolic process	20	0.000909612	FBgn0004556, FBgn0053505, FBgn0011824, FBgn0030704, FBgn0038146, FBgn0035831, FBgn0029148, FBgn0039182, FBgn0259937, FBgn0036514, FBgn0010300, FBgn0029714, FBgn0038737, FBgn0036964, FBgn0037778, FBgn0032408, FBgn0039627, FBgn0033548, FBgn0003062, FBgn0023527	0.0150082
GO:0051252	regulation of RNA metabolic process	192	0.000927375	FBgn0029504, FBgn0013746, FBgn0001179, FBgn0004567, FBgn0033846, FBgn0034012, FBgn0003165, FBgn0000448, FBgn0042696, FBgn0037445, FBgn0010303, FBgn0001168, FBgn0035954, FBgn0000629, FBgn0013753, FBgn0035956, FBgn0029094, FBgn0000439, FBgn0005410, FBgn0010109, FBgn0037344, FBgn0003944, FBgn0051390, FBgn0000330, FBgn0030093, FBgn0086680, FBgn0015239, FBgn0003145, FBgn0011291, FBgn0011290, FBgn00262…	0.0152188
GO:0042461	photoreceptor cell development	27	0.00101964	FBgn0003310, FBgn0261397, FBgn0004647, FBgn0013726, FBgn0033179, FBgn0086911, FBgn0040294, FBgn0000173, FBgn0000320, FBgn0015790, FBgn0000313, FBgn0001316, FBgn0003053, FBgn0026252, FBgn0000414, FBgn0044323, FBgn0023489, FBgn0000723, FBgn0016081, FBgn0000097, FBgn0005619, FBgn0010909, FBgn0086677, FBgn0011661, FBgn0000546, FBgn0003118, FBgn0259220	0.0166337
GO:0050657	nucleic acid transport	27	0.00101964	FBgn0002736, FBgn0030674, FBgn0026634, FBgn0031456, FBgn0014189, FBgn0026207, FBgn0039004, FBgn0038950, FBgn0015277, FBgn0028974, FBgn0033378, FBgn0033380, FBgn0034939, FBgn0020497, FBgn0038722, FBgn0036184, FBgn0002566, FBgn0033316, FBgn0015795, FBgn0003321, FBgn0087035, FBgn0038810, FBgn0039016, FBgn0027779, FBgn0003891, FBgn0034794, FBgn0001404	0.0166337
GO:0050658	RNA transport	27	0.00101964	FBgn0002736, FBgn0030674, FBgn0026634, FBgn0031456, FBgn0014189, FBgn0026207, FBgn0039004, FBgn0038950, FBgn0015277, FBgn0028974, FBgn0033378, FBgn0033380, FBgn0034939, FBgn0020497, FBgn0038722, FBgn0036184, FBgn0002566, FBgn0033316, FBgn0015795, FBgn0003321, FBgn0087035, FBgn0038810, FBgn0039016, FBgn0027779, FBgn0003891, FBgn0034794, FBgn0001404	0.0166337
GO:0008283	cell proliferation	46	0.0011061	FBgn0011674, FBgn0002914, FBgn0000404, FBgn0001981, FBgn0011207, FBgn0025638, FBgn0001075, FBgn0021825, FBgn0004647, FBgn0000114, FBgn0086695, FBgn0000497, FBgn0020306, FBgn0010300, FBgn0043884, FBgn0086356, FBgn0250789, FBgn0016917, FBgn0002121, FBgn0035136, FBgn0015270, FBgn0000536, FBgn0023423, FBgn0003882, FBgn0040080, FBgn0036752, FBgn0034939, FBgn0015754, FBgn0026252, FBgn0001624, FBgn00118…	0.0179386
GO:0000278	mitotic cell cycle	109	0.00110689	FBgn0031696, FBgn0002914, FBgn0040235, FBgn0040233, FBgn0040232, FBgn0014029, FBgn0035692, FBgn0052438, FBgn0003165, FBgn0039731, FBgn0259791, FBgn0028662, FBgn0027783, FBgn0039206, FBgn0002525, FBgn0032698, FBgn0036314, FBgn0010382, FBgn0024227, FBgn0034878, FBgn0002791, FBgn0000629, FBgn0037249, FBgn0002924, FBgn0086134, FBgn0015925, FBgn0039626, FBgn0025742, FBgn0000063, FBgn0030208, FBgn00305…	0.0178586
GO:0035107	appendage morphogenesis	78	0.00111356	FBgn0041604, FBgn0000179, FBgn0026411, FBgn0020224, FBgn0001075, FBgn0011224, FBgn0000139, FBgn0260003, FBgn0024250, FBgn0042641, FBgn0016917, FBgn0002413, FBgn0085432, FBgn0010341, FBgn0001987, FBgn0003371, FBgn0031005, FBgn0003130, FBgn0024846, FBgn0028427, FBgn0261268, FBgn0034876, FBgn0003175, FBgn0000289, FBgn0020521, FBgn0005410, FBgn0037657, FBgn0003944, FBgn0000489, FBgn0001123, FBgn00002…	0.017873
GO:0000381	regulation of alternative nuclear mRNA splicing, via spliceosome	25	0.0011251	FBgn0017457, FBgn0004237, FBgn0001179, FBgn0005649, FBgn0039977, FBgn0039229, FBgn0014189, FBgn0067622, FBgn0000114, FBgn0032240, FBgn0086895, FBgn0020306, FBgn0028474, FBgn0016978, FBgn0035235, FBgn0000662, FBgn0040286, FBgn0039182, FBgn0035872, FBgn0036828, FBgn0015907, FBgn0037344, FBgn0030631, FBgn0000330, FBgn0037220, FBgn0259220	0.0179644
GO:0007167	enzyme linked receptor protein signaling pathway	51	0.00120974	FBgn0041604, FBgn0010389, FBgn0020224, FBgn0024250, FBgn0043884, FBgn0026317, FBgn0029006, FBgn0010341, FBgn0023444, FBgn0031450, FBgn0086384, FBgn0000382, FBgn0024846, FBgn0053531, FBgn0005410, FBgn0014388, FBgn0026369, FBgn0025936, FBgn0004583, FBgn0000221, FBgn0020440, FBgn0003867, FBgn0020386, FBgn0003310, FBgn0038755, FBgn0020248, FBgn0020245, FBgn0003317, FBgn0003079, FBgn0025800, FBgn00019…	0.0192055
GO:0035114	imaginal disc-derived appendage morphogenesis	77	0.001218	FBgn0041604, FBgn0000179, FBgn0026411, FBgn0020224, FBgn0001075, FBgn0011224, FBgn0000139, FBgn0260003, FBgn0024250, FBgn0042641, FBgn0002413, FBgn0016917, FBgn0085432, FBgn0010341, FBgn0001987, FBgn0003371, FBgn0031005, FBgn0003130, FBgn0024846, FBgn0028427, FBgn0261268, FBgn0034876, FBgn0003175, FBgn0000289, FBgn0005410, FBgn0020521, FBgn0037657, FBgn0003944, FBgn0000489, FBgn0001123, FBgn00002…	0.0192378
GO:0016050	vesicle organization	17	0.00125655	FBgn0030089, FBgn0000257, FBgn0003210, FBgn0000247, FBgn0001087, FBgn0039132, FBgn0002567, FBgn0000482, FBgn0013343, FBgn0003008, FBgn0011758, FBgn0039774, FBgn0000330, FBgn0026479, FBgn0031450, FBgn0016975, FBgn0085408	0.0197413
GO:0007178	transmembrane receptor protein serine/threonine kinase signaling pathway	18	0.00129351	FBgn0041604, FBgn0086384, FBgn0051232, FBgn0011648, FBgn0004583, FBgn0024846, FBgn0024250, FBgn0026369, FBgn0020245, FBgn0034081, FBgn0003317, FBgn0025800, FBgn0039914, FBgn0029006, FBgn0010341, FBgn0002121, FBgn0031461, FBgn0030600	0.0202148
GO:0016567	protein ubiquitination	20	0.00130458	FBgn0029996, FBgn0032467, FBgn0030809, FBgn0036546, FBgn0025638, FBgn0031107, FBgn0086694, FBgn0086442, FBgn0027609, FBgn0041174, FBgn0027936, FBgn0029006, FBgn0041100, FBgn0259174, FBgn0035136, FBgn0000173, FBgn0030600, FBgn0034410, FBgn0003410, FBgn0044020	0.0202847
GO:0042254	ribosome biogenesis	27	0.00134451	FBgn0053505, FBgn0037899, FBgn0030704, FBgn0023542, FBgn0029148, FBgn0259937, FBgn0036514, FBgn0038737, FBgn0028473, FBgn0032408, FBgn0036964, FBgn0023527, FBgn0004556, FBgn0034915, FBgn0011824, FBgn0033485, FBgn0038146, FBgn0035831, FBgn0032818, FBgn0039182, FBgn0029714, FBgn0038746, FBgn0039627, FBgn0037778, FBgn0033548, FBgn0003062, FBgn0037073	0.0207962
GO:0007017	microtubule-based process	121	0.00138741	FBgn0031696, FBgn0002914, FBgn0040235, FBgn0040233, FBgn0036195, FBgn0040232, FBgn0026141, FBgn0035692, FBgn0035489, FBgn0039731, FBgn0028662, FBgn0027783, FBgn0041161, FBgn0039206, FBgn0036314, FBgn0260639, FBgn0034155, FBgn0033378, FBgn0259108, FBgn0024227, FBgn0020497, FBgn0037249, FBgn0002924, FBgn0013756, FBgn0086134, FBgn0003654, FBgn0039213, FBgn0259243, FBgn0034566, FBgn0039626, FBgn00305…	0.0213474
GO:0010564	regulation of cell cycle process	33	0.00145548	FBgn0000063, FBgn0002914, FBgn0031696, FBgn0004583, FBgn0025781, FBgn0024689, FBgn0000404, FBgn0031399, FBgn0039403, FBgn0031107, FBgn0000114, FBgn0004647, FBgn0035194, FBgn0004643, FBgn0035640, FBgn0032698, FBgn0001965, FBgn0061476, FBgn0004373, FBgn0010382, FBgn0004889, FBgn0003884, FBgn0034231, FBgn0030600, FBgn0023423, FBgn0011648, FBgn0021760, FBgn0003525, FBgn0004837, FBgn0003268, FBgn00503…	0.0222741
GO:0006974	response to DNA damage stimulus	42	0.0015734	FBgn0004584, FBgn0001179, FBgn0035766, FBgn0031399, FBgn0015024, FBgn0038704, FBgn0033273, FBgn0027914, FBgn0002872, FBgn0024252, FBgn0026869, FBgn0028434, FBgn0032698, FBgn0030931, FBgn0015553, FBgn0027378, FBgn0030646, FBgn0034728, FBgn0043002, FBgn0027375, FBgn0025808, FBgn0037141, FBgn0036843, FBgn0040268, FBgn0037202, FBgn0020270, FBgn0015546, FBgn0034976, FBgn0261109, FBgn0037301, FBgn00029…	0.0239412
GO:0065009	regulation of molecular function	55	0.00162316	FBgn0038401, FBgn0024944, FBgn0035073, FBgn0020224, FBgn0259791, FBgn0038304, FBgn0001079, FBgn0040005, FBgn0026192, FBgn0024252, FBgn0030915, FBgn0010303, FBgn0010341, FBgn0035136, FBgn0029113, FBgn0028429, FBgn0026323, FBgn0005198, FBgn0031304, FBgn0028985, FBgn0001123, FBgn0045073, FBgn0261261, FBgn0024326, FBgn0000351, FBgn0043458, FBgn0028546, FBgn0033349, FBgn0027620, FBgn0036237, FBgn00391…	0.02457
GO:0006323	DNA packaging	27	0.0017548	FBgn0003732, FBgn0027620, FBgn0017577, FBgn0053808, FBgn0003612, FBgn0015391, FBgn0027783, FBgn0259876, FBgn0015270, FBgn0014127, FBgn0053822, FBgn0004374, FBgn0024227, FBgn0027835, FBgn0000541, FBgn0028734, FBgn0029094, FBgn0004828, FBgn0016685, FBgn0030054, FBgn0015268, FBgn0053857, FBgn0086906, FBgn0014879, FBgn0014861, FBgn0053896, FBgn0039680	0.0264099
GO:0006364	rRNA processing	19	0.00186988	FBgn0004556, FBgn0053505, FBgn0011824, FBgn0030704, FBgn0038146, FBgn0035831, FBgn0029148, FBgn0039182, FBgn0259937, FBgn0036514, FBgn0029714, FBgn0038737, FBgn0036964, FBgn0037778, FBgn0032408, FBgn0039627, FBgn0033548, FBgn0003062, FBgn0023527	0.0279843
GO:0050803	regulation of synapse structure and activity	19	0.00186988	FBgn0015790, FBgn0259108, FBgn0011648, FBgn0002791, FBgn0004242, FBgn0035060, FBgn0040230, FBgn0003165, FBgn0028734, FBgn0024273, FBgn0003380, FBgn0003317, FBgn0250789, FBgn0014001, FBgn0015803, FBgn0259174, FBgn0250788, FBgn0086676, FBgn0030600	0.0279843
GO:0001754	eye photoreceptor cell differentiation	42	0.00189919	FBgn0004583, FBgn0003310, FBgn0261397, FBgn0004647, FBgn0013726, FBgn0033179, FBgn0004644, FBgn0043884, FBgn0086911, FBgn0011758, FBgn0040294, FBgn0001965, FBgn0001297, FBgn0027053, FBgn0003410, FBgn0000320, FBgn0086384, FBgn0000382, FBgn0000313, FBgn0001168, FBgn0015790, FBgn0001316, FBgn0000210, FBgn0026252, FBgn0044323, FBgn0000414, FBgn0023489, FBgn0001085, FBgn0004638, FBgn0004595, FBgn00218…	0.0282818
GO:0009887	organ morphogenesis	188	0.0020969	FBgn0041604, FBgn0010389, FBgn0250876, FBgn0020224, FBgn0000137, FBgn0001075, FBgn0011224, FBgn0026207, FBgn0000139, FBgn0033179, FBgn0260003, FBgn0002526, FBgn0002525, FBgn0004049, FBgn0002413, FBgn0042641, FBgn0029006, FBgn0010303, FBgn0003371, FBgn0031005, FBgn0001168, FBgn0024846, FBgn0044323, FBgn0261268, FBgn0023489, FBgn0034876, FBgn0003175, FBgn0005410, FBgn0003654, FBgn0011723, FBgn00143…	0.0310351
GO:0016265	death	55	0.00221095	FBgn0033988, FBgn0034366, FBgn0024732, FBgn0027609, FBgn0027885, FBgn0024252, FBgn0033935, FBgn0035136, FBgn0003882, FBgn0086378, FBgn0025697, FBgn0010435, FBgn0037700, FBgn0026323, FBgn0011763, FBgn0000568, FBgn0036974, FBgn0000565, FBgn0015247, FBgn0053193, FBgn0043364, FBgn0046687, FBgn0014006, FBgn0028360, FBgn0015239, FBgn0036237, FBgn0000117, FBgn0020386, FBgn0004647, FBgn0013726, FBgn00203…	0.0325431
GO:0035075	response to ecdysone	13	0.00232675	FBgn0000210, FBgn0037770, FBgn0000541, FBgn0005634, FBgn0016687, FBgn0035538, FBgn0013948, FBgn0000568, FBgn0015925, FBgn0002121, FBgn0034262, FBgn0030486, FBgn0000546	0.03406
GO:0048545	response to steroid hormone stimulus	13	0.00232675	FBgn0000210, FBgn0037770, FBgn0000541, FBgn0005634, FBgn0016687, FBgn0035538, FBgn0013948, FBgn0000568, FBgn0015925, FBgn0002121, FBgn0034262, FBgn0030486, FBgn0000546	0.03406
GO:0051963	regulation of synaptogenesis	13	0.00232675	FBgn0011648, FBgn0002791, FBgn0259108, FBgn0035060, FBgn0003165, FBgn0028734, FBgn0024273, FBgn0003317, FBgn0250789, FBgn0259174, FBgn0250788, FBgn0086676, FBgn0030600	0.03406
GO:0051276	chromosome organization	87	0.00242889	FBgn0000404, FBgn0034314, FBgn0040232, FBgn0025682, FBgn0000405, FBgn0017577, FBgn0052438, FBgn0003475, FBgn0000139, FBgn0003612, FBgn0027783, FBgn0015391, FBgn0027378, FBgn0014127, FBgn0053822, FBgn0034410, FBgn0039067, FBgn0024227, FBgn0000629, FBgn0013717, FBgn0040078, FBgn0015546, FBgn0038576, FBgn0016687, FBgn0029094, FBgn0000146, FBgn0004828, FBgn0014340, FBgn0016685, FBgn0003268, FBgn00300…	0.0353646
GO:0000165	MAPKKK cascade	20	0.00254	FBgn0026252, FBgn0024846, FBgn0044323, FBgn0259212, FBgn0039532, FBgn0026323, FBgn0004638, FBgn0003502, FBgn0040281, FBgn0010303, FBgn0010341, FBgn0000097, FBgn0014001, FBgn0010909, FBgn0001297, FBgn0052179, FBgn0043364, FBgn0024329, FBgn0010269, FBgn0024326	0.0367832
GO:0031399	regulation of protein modification process	20	0.00254	FBgn0000351, FBgn0030208, FBgn0043458, FBgn0000257, FBgn0003210, FBgn0028546, FBgn0038286, FBgn0028429, FBgn0034542, FBgn0020388, FBgn0026402, FBgn0052672, FBgn0026181, FBgn0259243, FBgn0034722, FBgn0033935, FBgn0010303, FBgn0053822, FBgn0010382, FBgn0024326	0.0367832
GO:0007243	protein kinase cascade	25	0.00259613	FBgn0016917, FBgn0010341, FBgn0010303, FBgn0014001, FBgn0001297, FBgn0010382, FBgn0023423, FBgn0026252, FBgn0044323, FBgn0259212, FBgn0024846, FBgn0039532, FBgn0026323, FBgn0004638, FBgn0010315, FBgn0003502, FBgn0040281, FBgn0000097, FBgn0010909, FBgn0052179, FBgn0024329, FBgn0043364, FBgn0010269, FBgn0024326, FBgn0027363	0.0374084
GO:0007254	JNK cascade	15	0.00264448	FBgn0044323, FBgn0259212, FBgn0039532, FBgn0004638, FBgn0026323, FBgn0003502, FBgn0040281, FBgn0010341, FBgn0010303, FBgn0000097, FBgn0014001, FBgn0010909, FBgn0001297, FBgn0043364, FBgn0024326	0.0379181
GO:0009451	RNA modification	18	0.00268107	FBgn0036000, FBgn0083992, FBgn0011824, FBgn0032016, FBgn0035901, FBgn0029148, FBgn0259937, FBgn0026079, FBgn0083976, FBgn0037816, FBgn0052281, FBgn0034735, FBgn0031321, FBgn0038737, FBgn0034214, FBgn0037778, FBgn0039627, FBgn0051719, FBgn0034703	0.0382578
GO:0007033	vacuole organization	16	0.00270285	FBgn0000257, FBgn0038808, FBgn0003210, FBgn0010638, FBgn0001087, FBgn0002566, FBgn0014411, FBgn0010803, FBgn0011509, FBgn0003008, FBgn0027083, FBgn0027085, FBgn0021906, FBgn0000330, FBgn0026479, FBgn0031005	0.0383879
GO:0007018	microtubule-based movement	38	0.0027099	FBgn0003887, FBgn0040233, FBgn0040232, FBgn0036195, FBgn0010622, FBgn0033206, FBgn0026141, FBgn0086446, FBgn0024432, FBgn0029878, FBgn0021825, FBgn0032243, FBgn0037962, FBgn0011692, FBgn0033243, FBgn0004374, FBgn0004379, FBgn0010235, FBgn0003884, FBgn0034155, FBgn0019968, FBgn0031829, FBgn0040228, FBgn0004378, FBgn0001316, FBgn0015754, FBgn0259108, FBgn0035799, FBgn0039140, FBgn0002924, FBgn00013…	0.0383123
GO:0001751	compound eye photoreceptor cell differentiation	40	0.00273131	FBgn0004583, FBgn0003310, FBgn0261397, FBgn0004647, FBgn0013726, FBgn0033179, FBgn0004644, FBgn0043884, FBgn0011758, FBgn0040294, FBgn0001965, FBgn0001297, FBgn0027053, FBgn0003410, FBgn0000320, FBgn0086384, FBgn0000382, FBgn0001168, FBgn0015790, FBgn0000313, FBgn0001316, FBgn0000210, FBgn0026252, FBgn0044323, FBgn0000414, FBgn0023489, FBgn0001085, FBgn0004638, FBgn0004595, FBgn0021818, FBgn00157…	0.0384359
GO:0008057	eye pigment granule organization	7	0.00277486	FBgn0000257, FBgn0003210, FBgn0011758, FBgn0001087, FBgn0000247, FBgn0002567, FBgn0000482	0.0388627
GO:0006887	exocytosis	27	0.00290343	FBgn0000257, FBgn0031454, FBgn0000346, FBgn0026634, FBgn0005586, FBgn0031537, FBgn0013343, FBgn0013726, FBgn0029088, FBgn0027103, FBgn0013997, FBgn0039774, FBgn0002121, FBgn0015816, FBgn0031450, FBgn0053653, FBgn0004574, FBgn0013759, FBgn0004242, FBgn0011288, FBgn0033876, FBgn0015797, FBgn0040285, FBgn0004179, FBgn0053547, FBgn0016975, FBgn0030230	0.0404479
GO:0045664	regulation of neuron differentiation	23	0.0029427	FBgn0000382, FBgn0041203, FBgn0016700, FBgn0028734, FBgn0024277, FBgn0013733, FBgn0029157, FBgn0004647, FBgn0004595, FBgn0086361, FBgn0038947, FBgn0014388, FBgn0016081, FBgn0026181, FBgn0021764, FBgn0003079, FBgn0010341, FBgn0000097, FBgn0014001, FBgn0053193, FBgn0023172, FBgn0005536, FBgn0003410	0.0408028
GO:0007034	vacuolar transport	11	0.00296712	FBgn0000257, FBgn0001087, FBgn0011232, FBgn0086679, FBgn0002566, FBgn0014411, FBgn0015795, FBgn0086676, FBgn0028741, FBgn0031450, FBgn0000482	0.0409534
GO:0016334	establishment or maintenance of polarity of follicular epithelium	11	0.00296712	FBgn0000382, FBgn0028992, FBgn0001624, FBgn0000221, FBgn0003079, FBgn0002121, FBgn0020224, FBgn0067864, FBgn0001404, FBgn0020278, FBgn0011763	0.0409534
GO:0008333	endosome to lysosome transport	6	0.00322402	FBgn0000257, FBgn0015795, FBgn0086676, FBgn0028741, FBgn0031450, FBgn0000482	0.0442301
GO:0007346	regulation of mitotic cell cycle	36	0.00323596	FBgn0000063, FBgn0002914, FBgn0031696, FBgn0004583, FBgn0025781, FBgn0000404, FBgn0039403, FBgn0031107, FBgn0000114, FBgn0004647, FBgn0035194, FBgn0004644, FBgn0004643, FBgn0035640, FBgn0020309, FBgn0025800, FBgn0001965, FBgn0061476, FBgn0010382, FBgn0004889, FBgn0003884, FBgn0034231, FBgn0027375, FBgn0030600, FBgn0023423, FBgn0020407, FBgn0015754, FBgn0011648, FBgn0021760, FBgn0003525, FBgn00032…	0.0441969
GO:0045165	cell fate commitment	73	0.00325594	FBgn0011674, FBgn0033988, FBgn0010389, FBgn0000404, FBgn0031399, FBgn0001981, FBgn0003165, FBgn0000137, FBgn0259791, FBgn0010300, FBgn0002522, FBgn0016917, FBgn0085432, FBgn0023444, FBgn0010382, FBgn0040080, FBgn0000382, FBgn0001168, FBgn0011666, FBgn0001624, FBgn0015014, FBgn0004595, FBgn0005410, FBgn0026320, FBgn0011723, FBgn0015778, FBgn0003944, FBgn0053193, FBgn0003891, FBgn0001169, FBgn00866…	0.0442707
GO:0008219	cell death	54	0.00326189	FBgn0033988, FBgn0034366, FBgn0024732, FBgn0027609, FBgn0027885, FBgn0024252, FBgn0033935, FBgn0035136, FBgn0003882, FBgn0086378, FBgn0025697, FBgn0010435, FBgn0037700, FBgn0026323, FBgn0011763, FBgn0000568, FBgn0036974, FBgn0000565, FBgn0015247, FBgn0053193, FBgn0043364, FBgn0046687, FBgn0014006, FBgn0028360, FBgn0015239, FBgn0036237, FBgn0000117, FBgn0020386, FBgn0004647, FBgn0013726, FBgn00203…	0.0441582
GO:0016568	chromatin modification	40	0.0032727	FBgn0010520, FBgn0027620, FBgn0020388, FBgn0086899, FBgn0086694, FBgn0000139, FBgn0020306, FBgn0034722, FBgn0027378, FBgn0033636, FBgn0043002, FBgn0034410, FBgn0039067, FBgn0024227, FBgn0032475, FBgn0037770, FBgn0052133, FBgn0000629, FBgn0027835, FBgn0000541, FBgn0013717, FBgn0041210, FBgn0040078, FBgn0038576, FBgn0016687, FBgn0029094, FBgn0028734, FBgn0002887, FBgn0014340, FBgn0015805, FBgn00317…	0.0441106
GO:0065004	protein-DNA complex assembly	21	0.00329055	FBgn0002774, FBgn0035918, FBgn0020633, FBgn0000541, FBgn0003687, FBgn0027620, FBgn0017577, FBgn0029094, FBgn0011836, FBgn0004828, FBgn0053808, FBgn0030054, FBgn0015268, FBgn0053857, FBgn0014879, FBgn0014861, FBgn0053896, FBgn0038371, FBgn0005617, FBgn0053822, FBgn0037540	0.0441561
GO:0048519	negative regulation of biological process	169	0.00333004	FBgn0031696, FBgn0038808, FBgn0013746, FBgn0033846, FBgn0038872, FBgn0024732, FBgn0003165, FBgn0020224, FBgn0001075, FBgn0011837, FBgn0032515, FBgn0026207, FBgn0024491, FBgn0027885, FBgn0010300, FBgn0002525, FBgn0002413, FBgn0032698, FBgn0003371, FBgn0031005, FBgn0001168, FBgn0259108, FBgn0002791, FBgn0259784, FBgn0000629, FBgn0011236, FBgn0022942, FBgn0036534, FBgn0000146, FBgn0014388, FBgn00101…	0.0444842
GO:0007030	Golgi organization	12	0.00339738	FBgn0052654, FBgn0039213, FBgn0032728, FBgn0000346, FBgn0026634, FBgn0036919, FBgn0034697, FBgn0000543, FBgn0035965, FBgn0261014, FBgn0030503, FBgn0004378	0.0451718
GO:0055001	muscle cell development	20	0.0034561	FBgn0041203, FBgn0259108, FBgn0000210, FBgn0010389, FBgn0005634, FBgn0027538, FBgn0001250, FBgn0038294, FBgn0014388, FBgn0015614, FBgn0086906, FBgn0011771, FBgn0039213, FBgn0000709, FBgn0000097, FBgn0001123, FBgn0086676, FBgn0034155, FBgn0003371, FBgn0003118	0.0457414
GO:0055002	striated muscle cell development	20	0.0034561	FBgn0041203, FBgn0259108, FBgn0000210, FBgn0010389, FBgn0005634, FBgn0027538, FBgn0001250, FBgn0038294, FBgn0014388, FBgn0015614, FBgn0086906, FBgn0011771, FBgn0039213, FBgn0000709, FBgn0000097, FBgn0001123, FBgn0086676, FBgn0034155, FBgn0003371, FBgn0003118	0.0457414
GO:0048523	negative regulation of cellular process	152	0.00358793	FBgn0031696, FBgn0038808, FBgn0013746, FBgn0033846, FBgn0038872, FBgn0024732, FBgn0003165, FBgn0020224, FBgn0001075, FBgn0024491, FBgn0027885, FBgn0010300, FBgn0002525, FBgn0002413, FBgn0032698, FBgn0003371, FBgn0031005, FBgn0001168, FBgn0259108, FBgn0002791, FBgn0259784, FBgn0000629, FBgn0011236, FBgn0000146, FBgn0014388, FBgn0010109, FBgn0003659, FBgn0001169, FBgn0000063, FBgn0004583, FBgn00285…	0.0472477
GO:0045786	negative regulation of cell cycle	13	0.00368237	FBgn0031696, FBgn0000063, FBgn0011648, FBgn0000404, FBgn0003165, FBgn0003268, FBgn0004643, FBgn0035640, FBgn0015799, FBgn0001965, FBgn0061476, FBgn0003884, FBgn0027375	0.04826
GO:0015931	nucleobase, nucleoside, nucleotide and nucleic acid transport	27	0.00368361	FBgn0002736, FBgn0030674, FBgn0026634, FBgn0031456, FBgn0014189, FBgn0026207, FBgn0039004, FBgn0038950, FBgn0015277, FBgn0028974, FBgn0033378, FBgn0033380, FBgn0034939, FBgn0020497, FBgn0038722, FBgn0036184, FBgn0002566, FBgn0033316, FBgn0015795, FBgn0003321, FBgn0087035, FBgn0038810, FBgn0039016, FBgn0027779, FBgn0003891, FBgn0034794, FBgn0001404	0.0480746
GO:0032535	regulation of cellular component size	36	0.00391289	FBgn0023081, FBgn0040230, FBgn0033159, FBgn0020386, FBgn0011204, FBgn0086706, FBgn0037647, FBgn0011771, FBgn0021796, FBgn0026317, FBgn0250789, FBgn0002413, FBgn0000479, FBgn0010303, FBgn0250788, FBgn0032859, FBgn0037874, FBgn0031005, FBgn0002774, FBgn0024913, FBgn0259212, FBgn0039532, FBgn0001085, FBgn0005198, FBgn0011787, FBgn0021814, FBgn0010315, FBgn0029157, FBgn0003502, FBgn0000723, FBgn00411…	0.0507836
GO:0007040	lysosome organization	15	0.00391451	FBgn0000257, FBgn0038808, FBgn0003210, FBgn0010638, FBgn0001087, FBgn0014411, FBgn0010803, FBgn0011509, FBgn0003008, FBgn0027083, FBgn0027085, FBgn0021906, FBgn0000330, FBgn0026479, FBgn0031005	0.0505945
GO:0007389	pattern specification process	137	0.00394468	FBgn0041604, FBgn0004567, FBgn0003165, FBgn0020224, FBgn0001075, FBgn0000139, FBgn0001079, FBgn0260003, FBgn0041161, FBgn0010300, FBgn0042641, FBgn0010303, FBgn0003371, FBgn0031005, FBgn0001168, FBgn0033378, FBgn0000146, FBgn0002926, FBgn0000439, FBgn0005410, FBgn0014388, FBgn0015925, FBgn0003944, FBgn0086347, FBgn0259243, FBgn0259240, FBgn0000242, FBgn0086655, FBgn0001169, FBgn0000256, FBgn00275…	0.0507655
GO:0051146	striated muscle cell differentiation	26	0.0039801	FBgn0041203, FBgn0010389, FBgn0027538, FBgn0001250, FBgn0038294, FBgn0086442, FBgn0011771, FBgn0026179, FBgn0034155, FBgn0003371, FBgn0002789, FBgn0259108, FBgn0000210, FBgn0243516, FBgn0005634, FBgn0024189, FBgn0014388, FBgn0015614, FBgn0086906, FBgn0039213, FBgn0000709, FBgn0013750, FBgn0000097, FBgn0001123, FBgn0086676, FBgn0003118	0.0510007
GO:0051640	organelle localization	31	0.00410645	FBgn0000063, FBgn0011674, FBgn0030500, FBgn0040232, FBgn0003732, FBgn0000405, FBgn0031537, FBgn0023542, FBgn0021825, FBgn0003514, FBgn0013726, FBgn0027103, FBgn0013997, FBgn0033107, FBgn0002525, FBgn0026479, FBgn0004379, FBgn0019968, FBgn0040080, FBgn0033378, FBgn0001316, FBgn0015754, FBgn0039140, FBgn0013759, FBgn0001624, FBgn0021760, FBgn0029157, FBgn0003654, FBgn0087035, FBgn0010909, FBgn00001…	0.0523655
GO:0016071	mRNA metabolic process	69	0.00410859	FBgn0033842, FBgn0040235, FBgn0031493, FBgn0031492, FBgn0036733, FBgn0005649, FBgn0036734, FBgn0039977, FBgn0035692, FBgn0052533, FBgn0003165, FBgn0011224, FBgn0003435, FBgn0031628, FBgn0038344, FBgn0031868, FBgn0027784, FBgn0028474, FBgn0036314, FBgn0035136, FBgn0037255, FBgn0032296, FBgn0033378, FBgn0011666, FBgn0037707, FBgn0034065, FBgn0028554, FBgn0039867, FBgn0036534, FBgn0022942, FBgn00006…	0.0521796
GO:0048285	organelle fission	51	0.00429551	FBgn0002914, FBgn0025781, FBgn0034058, FBgn0040233, FBgn0000404, FBgn0040232, FBgn0000405, FBgn0014029, FBgn0003165, FBgn0052438, FBgn0259791, FBgn0021825, FBgn0029891, FBgn0035640, FBgn0015391, FBgn0027783, FBgn0032698, FBgn0014127, FBgn0039068, FBgn0002791, FBgn0034878, FBgn0024227, FBgn0002924, FBgn0003525, FBgn0003268, FBgn0015925, FBgn0086906, FBgn0030500, FBgn0026433, FBgn0035766, FBgn00037…	0.0542728
GO:0007076	mitotic chromosome condensation	10	0.00431955	FBgn0024227, FBgn0015391, FBgn0027783, FBgn0086906, FBgn0259876, FBgn0003732, FBgn0014127, FBgn0015270, FBgn0004374, FBgn0039680	0.0543496
GO:0007307	eggshell chorion gene amplification	10	0.00431955	FBgn0002914, FBgn0034430, FBgn0033846, FBgn0015799, FBgn0015270, FBgn0000307, FBgn0033081, FBgn0010382, FBgn0000996, FBgn0011763	0.0543496
GO:0016477	cell migration	57	0.00434792	FBgn0010389, FBgn0001981, FBgn0003165, FBgn0020224, FBgn0029088, FBgn0026192, FBgn0016917, FBgn0010303, FBgn0010341, FBgn0027053, FBgn0031450, FBgn0000382, FBgn0013717, FBgn0000482, FBgn0011723, FBgn0004512, FBgn0046687, FBgn0000182, FBgn0086655, FBgn0027363, FBgn0004606, FBgn0000221, FBgn0001250, FBgn0015477, FBgn0004647, FBgn0003514, FBgn0003499, FBgn0004644, FBgn0020245, FBgn0003079, FBgn00363…	0.0544785
GO:0000070	mitotic sister chromatid segregation	20	0.00463065	FBgn0024227, FBgn0030500, FBgn0000404, FBgn0035766, FBgn0040232, FBgn0003732, FBgn0000405, FBgn0052438, FBgn0021760, FBgn0003268, FBgn0004643, FBgn0015391, FBgn0027783, FBgn0086906, FBgn0259876, FBgn0015270, FBgn0014127, FBgn0039680, FBgn0004374, FBgn0004379	0.057694
GO:0045841	negative regulation of mitotic metaphase/anaphase transition	8	0.00478702	FBgn0031696, FBgn0000063, FBgn0003268, FBgn0004643, FBgn0035640, FBgn0000404, FBgn0061476, FBgn0003884	0.0593517
GO:0006403	RNA localization	43	0.00488481	FBgn0011674, FBgn0000256, FBgn0026433, FBgn0030674, FBgn0002736, FBgn0026634, FBgn0031456, FBgn0003475, FBgn0014189, FBgn0026207, FBgn0038950, FBgn0039004, FBgn0016070, FBgn0041161, FBgn0040294, FBgn0015277, FBgn0028974, FBgn0086384, FBgn0033378, FBgn0033380, FBgn0020497, FBgn0038722, FBgn0034939, FBgn0015754, FBgn0036184, FBgn0003721, FBgn0045862, FBgn0015797, FBgn0002566, FBgn0033316, FBgn00157…	0.060291
GO:0048193	Golgi vesicle transport	19	0.0048853	FBgn0053635, FBgn0028968, FBgn0016700, FBgn0001087, FBgn0260861, FBgn0000346, FBgn0011288, FBgn0025725, FBgn0026634, FBgn0003310, FBgn0004132, FBgn0020647, FBgn0030141, FBgn0011232, FBgn0033714, FBgn0035965, FBgn0041775, FBgn0033052, FBgn0023527	0.0600604
GO:0006277	DNA amplification	11	0.00497483	FBgn0002914, FBgn0034430, FBgn0033846, FBgn0015799, FBgn0015270, FBgn0000307, FBgn0033081, FBgn0010382, FBgn0086695, FBgn0000996, FBgn0011763	0.0608906
GO:0051129	negative regulation of cellular component organization	23	0.00497886	FBgn0000063, FBgn0031696, FBgn0002791, FBgn0024689, FBgn0000404, FBgn0016700, FBgn0021760, FBgn0028734, FBgn0013733, FBgn0029157, FBgn0024273, FBgn0034650, FBgn0038947, FBgn0003268, FBgn0004643, FBgn0035640, FBgn0250789, FBgn0061476, FBgn0004373, FBgn0250788, FBgn0053822, FBgn0003884, FBgn0030600	0.0607013
GO:0043623	cellular protein complex assembly	31	0.00503441	FBgn0035960, FBgn0031454, FBgn0003887, FBgn0020440, FBgn0035805, FBgn0000346, FBgn0031456, FBgn0024921, FBgn0038294, FBgn0010341, FBgn0002121, FBgn0051961, FBgn0260639, FBgn0031450, FBgn0003884, FBgn0004379, FBgn0001337, FBgn0033812, FBgn0004574, FBgn0020497, FBgn0029117, FBgn0026252, FBgn0005634, FBgn0051648, FBgn0003545, FBgn0011823, FBgn0039689, FBgn0015614, FBgn0042177, FBgn0038746, FBgn00317…	0.0611212
GO:0048638	regulation of developmental growth	18	0.00512566	FBgn0041604, FBgn0259108, FBgn0011648, FBgn0004583, FBgn0002791, FBgn0035060, FBgn0003165, FBgn0028734, FBgn0001075, FBgn0013733, FBgn0024273, FBgn0003944, FBgn0003317, FBgn0250789, FBgn0053193, FBgn0250788, FBgn0086676, FBgn0030600	0.0619566
GO:0048583	regulation of response to stimulus	37	0.00513789	FBgn0028546, FBgn0010329, FBgn0032840, FBgn0015286, FBgn0000117, FBgn0004647, FBgn0028990, FBgn0020381, FBgn0026317, FBgn0016917, FBgn0010303, FBgn0038928, FBgn0041100, FBgn0013799, FBgn0086378, FBgn0014467, FBgn0003053, FBgn0024846, FBgn0259212, FBgn0044323, FBgn0014018, FBgn0026323, FBgn0005198, FBgn0011764, FBgn0022787, FBgn0013983, FBgn0034647, FBgn0040281, FBgn0003380, FBgn0039338, FBgn00297…	0.0618615
GO:0008582	regulation of synaptic growth at neuromuscular junction	12	0.00538769	FBgn0259108, FBgn0002791, FBgn0011648, FBgn0003317, FBgn0035060, FBgn0250789, FBgn0003165, FBgn0250788, FBgn0028734, FBgn0086676, FBgn0030600, FBgn0024273	0.0645299
GO:0048585	negative regulation of response to stimulus	12	0.00538769	FBgn0034647, FBgn0003053, FBgn0028546, FBgn0026317, FBgn0015286, FBgn0016917, FBgn0041100, FBgn0005198, FBgn0038197, FBgn0011764, FBgn0004647, FBgn0028990	0.0645299
GO:0048641	regulation of skeletal muscle tissue development	12	0.00538769	FBgn0259108, FBgn0002791, FBgn0011648, FBgn0003317, FBgn0035060, FBgn0250789, FBgn0003165, FBgn0250788, FBgn0028734, FBgn0086676, FBgn0030600, FBgn0024273	0.0645299
GO:0048742	regulation of skeletal muscle fiber development	12	0.00538769	FBgn0259108, FBgn0002791, FBgn0011648, FBgn0003317, FBgn0035060, FBgn0250789, FBgn0003165, FBgn0250788, FBgn0028734, FBgn0086676, FBgn0030600, FBgn0024273	0.0645299
GO:0051147	regulation of muscle cell differentiation	12	0.00538769	FBgn0259108, FBgn0002791, FBgn0011648, FBgn0003317, FBgn0035060, FBgn0250789, FBgn0003165, FBgn0250788, FBgn0028734, FBgn0086676, FBgn0030600, FBgn0024273	0.0645299
GO:0051153	regulation of striated muscle cell differentiation	12	0.00538769	FBgn0259108, FBgn0002791, FBgn0011648, FBgn0003317, FBgn0035060, FBgn0250789, FBgn0003165, FBgn0250788, FBgn0028734, FBgn0086676, FBgn0030600, FBgn0024273	0.0645299
GO:0006120	mitochondrial electron transport, NADH to ubiquinone	16	0.00551814	FBgn0031436, FBgn0032511, FBgn0035046, FBgn0030853, FBgn0047038, FBgn0033961, FBgn0040705, FBgn0017567, FBgn0039689, FBgn0031228, FBgn0029868, FBgn0031505, FBgn0025839, FBgn0011455, FBgn0001989, FBgn0030718	0.0657925
GO:0008105	asymmetric protein localization	16	0.00551814	FBgn0011674, FBgn0001624, FBgn0002736, FBgn0045862, FBgn0001085, FBgn0001105, FBgn0000146, FBgn0259791, FBgn0026192, FBgn0015925, FBgn0002121, FBgn0067864, FBgn0000163, FBgn0011661, FBgn0040080, FBgn0020278	0.0657925
GO:0031098	stress-activated protein kinase signaling pathway	15	0.00563823	FBgn0044323, FBgn0259212, FBgn0039532, FBgn0004638, FBgn0026323, FBgn0003502, FBgn0040281, FBgn0010341, FBgn0010303, FBgn0000097, FBgn0014001, FBgn0010909, FBgn0001297, FBgn0043364, FBgn0024326	0.0669247
GO:0022613	ribonucleoprotein complex biogenesis	34	0.00564602	FBgn0053505, FBgn0037899, FBgn0030704, FBgn0023542, FBgn0029148, FBgn0259937, FBgn0036514, FBgn0032340, FBgn0038737, FBgn0036964, FBgn0028473, FBgn0032408, FBgn0023527, FBgn0004556, FBgn0034915, FBgn0033485, FBgn0011824, FBgn0038146, FBgn0028554, FBgn0035831, FBgn0000146, FBgn0032818, FBgn0040286, FBgn0039182, FBgn0087035, FBgn0039016, FBgn0029714, FBgn0039626, FBgn0038746, FBgn0033548, FBgn00396…	0.0667613
GO:0022411	cellular component disassembly	14	0.00567791	FBgn0032261, FBgn0011207, FBgn0024732, FBgn0002542, FBgn0031868, FBgn0039213, FBgn0259876, FBgn0036974, FBgn0035049, FBgn0038206, FBgn0010303, FBgn0037218, FBgn0004179, FBgn0020443	0.0668743
GO:0006836	neurotransmitter transport	43	0.0057221	FBgn0030089, FBgn0031454, FBgn0013749, FBgn0028582, FBgn0000346, FBgn0039132, FBgn0005586, FBgn0031537, FBgn0013343, FBgn0027103, FBgn0003008, FBgn0013997, FBgn0250789, FBgn0039774, FBgn0002121, FBgn0250788, FBgn0026378, FBgn0031450, FBgn0053653, FBgn0004574, FBgn0013759, FBgn0027505, FBgn0035060, FBgn0004242, FBgn0011288, FBgn0033876, FBgn0034913, FBgn0028734, FBgn0034911, FBgn0040285, FBgn00156…	0.0671261
GO:0001738	morphogenesis of a polarized epithelium	27	0.0057785	FBgn0041203, FBgn0001075, FBgn0004647, FBgn0003514, FBgn0000497, FBgn0026192, FBgn0002413, FBgn0010303, FBgn0001297, FBgn0002121, FBgn0067864, FBgn0003053, FBgn0026252, FBgn0001624, FBgn0259212, FBgn0005634, FBgn0001085, FBgn0026323, FBgn0026320, FBgn0014388, FBgn0015778, FBgn0026181, FBgn0010909, FBgn0052179, FBgn0043364, FBgn0000163, FBgn0015904	0.067514
GO:0007559	histolysis	27	0.0057785	FBgn0028360, FBgn0034366, FBgn0015239, FBgn0027932, FBgn0024252, FBgn0037270, FBgn0002121, FBgn0000210, FBgn0025697, FBgn0010435, FBgn0037700, FBgn0005634, FBgn0035107, FBgn0015795, FBgn0087035, FBgn0013948, FBgn0000568, FBgn0010709, FBgn0036974, FBgn0035049, FBgn0000565, FBgn0013770, FBgn0043364, FBgn0029176, FBgn0000099, FBgn0000546, FBgn0259220	0.067514
GO:0016271	tissue death	27	0.0057785	FBgn0028360, FBgn0034366, FBgn0015239, FBgn0027932, FBgn0024252, FBgn0037270, FBgn0002121, FBgn0000210, FBgn0025697, FBgn0010435, FBgn0037700, FBgn0005634, FBgn0035107, FBgn0015795, FBgn0087035, FBgn0013948, FBgn0000568, FBgn0010709, FBgn0036974, FBgn0035049, FBgn0000565, FBgn0013770, FBgn0043364, FBgn0029176, FBgn0000099, FBgn0000546, FBgn0259220	0.067514
GO:0032268	regulation of cellular protein metabolic process	44	0.00608584	FBgn0043458, FBgn0000257, FBgn0000351, FBgn0038808, FBgn0030208, FBgn0003210, FBgn0028546, FBgn0038234, FBgn0020388, FBgn0003165, FBgn0000114, FBgn0028990, FBgn0004644, FBgn0016070, FBgn0010300, FBgn0034722, FBgn0010303, FBgn0033935, FBgn0010382, FBgn0053822, FBgn0027053, FBgn0011666, FBgn0015754, FBgn0037249, FBgn0038100, FBgn0038286, FBgn0027835, FBgn0036462, FBgn0028429, FBgn0034542, FBgn00287…	0.0707218
GO:0000819	sister chromatid segregation	20	0.006115	FBgn0024227, FBgn0030500, FBgn0000404, FBgn0035766, FBgn0040232, FBgn0003732, FBgn0000405, FBgn0052438, FBgn0021760, FBgn0003268, FBgn0004643, FBgn0015391, FBgn0027783, FBgn0086906, FBgn0259876, FBgn0015270, FBgn0014127, FBgn0039680, FBgn0004374, FBgn0004379	0.070787
GO:0009309	amine biosynthetic process	20	0.006115	FBgn0052068, FBgn0010329, FBgn0000422, FBgn0036272, FBgn0001125, FBgn0041607, FBgn0037138, FBgn0019932, FBgn0037146, FBgn0005278, FBgn0015781, FBgn0000303, FBgn0003423, FBgn0014427, FBgn0037305, FBgn0005619, FBgn0004087, FBgn0001124, FBgn0005626, FBgn0000536	0.070787
GO:0050767	regulation of neurogenesis	26	0.00628648	FBgn0041203, FBgn0024277, FBgn0004647, FBgn0038947, FBgn0010300, FBgn0003079, FBgn0010341, FBgn0014001, FBgn0002121, FBgn0003410, FBgn0031005, FBgn0000382, FBgn0016700, FBgn0028734, FBgn0013733, FBgn0029157, FBgn0004595, FBgn0086361, FBgn0014388, FBgn0016081, FBgn0026181, FBgn0021764, FBgn0000097, FBgn0053193, FBgn0023172, FBgn0005536	0.0724369
GO:0007041	lysosomal transport	9	0.00629989	FBgn0000257, FBgn0001087, FBgn0086679, FBgn0002566, FBgn0015795, FBgn0086676, FBgn0028741, FBgn0031450, FBgn0000482	0.0723204
GO:0043241	protein complex disassembly	9	0.00629989	FBgn0002542, FBgn0031868, FBgn0032261, FBgn0039213, FBgn0036974, FBgn0038206, FBgn0037218, FBgn0004179, FBgn0020443	0.0723204
GO:0043624	cellular protein complex disassembly	9	0.00629989	FBgn0002542, FBgn0031868, FBgn0032261, FBgn0039213, FBgn0036974, FBgn0038206, FBgn0037218, FBgn0004179, FBgn0020443	0.0723204
GO:0006261	DNA-dependent DNA replication	23	0.00636858	FBgn0015664, FBgn0037141, FBgn0035918, FBgn0010438, FBgn0034878, FBgn0020633, FBgn0040268, FBgn0017577, FBgn0023181, FBgn0011764, FBgn0003502, FBgn0259676, FBgn0011762, FBgn0032906, FBgn0032154, FBgn0014861, FBgn0015799, FBgn0032698, FBgn0033690, FBgn0005654, FBgn0015270, FBgn0004406, FBgn0000996	0.0728154
GO:0042692	muscle cell differentiation	28	0.00655159	FBgn0041203, FBgn0033988, FBgn0010389, FBgn0027538, FBgn0001250, FBgn0038294, FBgn0004647, FBgn0086442, FBgn0011771, FBgn0026179, FBgn0034155, FBgn0003371, FBgn0002789, FBgn0259108, FBgn0000210, FBgn0243516, FBgn0005634, FBgn0024189, FBgn0014388, FBgn0015614, FBgn0086906, FBgn0039213, FBgn0000709, FBgn0013750, FBgn0000097, FBgn0001123, FBgn0086676, FBgn0003118	0.0745625
GO:0006605	protein targeting	38	0.00659602	FBgn0000257, FBgn0010391, FBgn0038808, FBgn0067628, FBgn0024921, FBgn0031456, FBgn0036928, FBgn0014411, FBgn0003310, FBgn0011509, FBgn0004132, FBgn0026207, FBgn0004644, FBgn0026170, FBgn0083968, FBgn0034535, FBgn0015816, FBgn0033052, FBgn0001337, FBgn0027358, FBgn0030669, FBgn0033812, FBgn0020497, FBgn0026252, FBgn0010638, FBgn0011823, FBgn0015298, FBgn0013756, FBgn0000482, FBgn0020647, FBgn00388…	0.074779
GO:0033043	regulation of organelle organization	38	0.00659602	FBgn0000063, FBgn0031696, FBgn0002914, FBgn0025781, FBgn0024689, FBgn0000404, FBgn0023081, FBgn0020388, FBgn0031107, FBgn0003514, FBgn0029891, FBgn0004643, FBgn0035640, FBgn0250789, FBgn0034722, FBgn0041100, FBgn0061476, FBgn0004373, FBgn0250788, FBgn0053822, FBgn0032859, FBgn0004889, FBgn0003884, FBgn0034231, FBgn0030600, FBgn0023423, FBgn0039141, FBgn0001085, FBgn0021760, FBgn0003525, FBgn00137…	0.074779
GO:0016053	organic acid biosynthetic process	25	0.00683494	FBgn0001941, FBgn0041607, FBgn0037138, FBgn0033883, FBgn0015781, FBgn0039754, FBgn0032603, FBgn0040001, FBgn0086687, FBgn0004087, FBgn0052068, FBgn0051522, FBgn0001125, FBgn0037146, FBgn0005278, FBgn0034145, FBgn0003423, FBgn0036691, FBgn0034142, FBgn0037534, FBgn0014427, FBgn0037305, FBgn0029969, FBgn0001124, FBgn0030485	0.0771107
GO:0046394	carboxylic acid biosynthetic process	25	0.00683494	FBgn0001941, FBgn0041607, FBgn0037138, FBgn0033883, FBgn0015781, FBgn0039754, FBgn0032603, FBgn0040001, FBgn0086687, FBgn0004087, FBgn0052068, FBgn0051522, FBgn0001125, FBgn0037146, FBgn0005278, FBgn0034145, FBgn0003423, FBgn0036691, FBgn0034142, FBgn0037534, FBgn0014427, FBgn0037305, FBgn0029969, FBgn0001124, FBgn0030485	0.0771107
GO:0009056	catabolic process	139	0.00685116	FBgn0029996, FBgn0010288, FBgn0034366, FBgn0039632, FBgn0040230, FBgn0034989, FBgn0024732, FBgn0003165, FBgn0027914, FBgn0031868, FBgn0039025, FBgn0028476, FBgn0029006, FBgn0032596, FBgn0031693, FBgn0037873, FBgn0034410, FBgn0032296, FBgn0002791, FBgn0039827, FBgn0029113, FBgn0261268, FBgn0010100, FBgn0038220, FBgn0036534, FBgn0032210, FBgn0030863, FBgn0034491, FBgn0035811, FBgn0086134, FBgn00031…	0.07701
GO:0042462	eye photoreceptor cell development	22	0.00687434	FBgn0015790, FBgn0000313, FBgn0001316, FBgn0026252, FBgn0000414, FBgn0044323, FBgn0023489, FBgn0003310, FBgn0261397, FBgn0004647, FBgn0013726, FBgn0033179, FBgn0016081, FBgn0086911, FBgn0040294, FBgn0000097, FBgn0005619, FBgn0086677, FBgn0011661, FBgn0000320, FBgn0003118, FBgn0259220	0.0769852
GO:0007016	cytoskeletal anchoring at plasma membrane	10	0.00730972	FBgn0260442, FBgn0043884, FBgn0020440, FBgn0027508, FBgn0028427, FBgn0000667, FBgn0011747, FBgn0041789, FBgn0010215, FBgn0000117	0.0813837
GO:0017145	stem cell division	21	0.00740747	FBgn0051232, FBgn0011674, FBgn0004872, FBgn0011648, FBgn0011666, FBgn0000404, FBgn0001981, FBgn0011207, FBgn0000117, FBgn0003165, FBgn0001105, FBgn0000146, FBgn0000114, FBgn0004644, FBgn0003317, FBgn0039016, FBgn0016917, FBgn0000163, FBgn0000536, FBgn0040080, FBgn0020278	0.0821385
GO:0050790	regulation of catalytic activity	48	0.00752597	FBgn0043458, FBgn0000351, FBgn0028546, FBgn0033349, FBgn0038401, FBgn0024944, FBgn0035073, FBgn0027620, FBgn0036237, FBgn0020224, FBgn0259791, FBgn0038304, FBgn0039158, FBgn0040005, FBgn0026192, FBgn0024252, FBgn0052484, FBgn0026170, FBgn0030915, FBgn0010303, FBgn0010341, FBgn0004435, FBgn0001297, FBgn0035136, FBgn0050372, FBgn0026378, FBgn0015754, FBgn0038286, FBgn0027505, FBgn0028429, FBgn00345…	0.0831074
GO:0002164	larval development	26	0.00779977	FBgn0028992, FBgn0010389, FBgn0011509, FBgn0004647, FBgn0082585, FBgn0004644, FBgn0038947, FBgn0250789, FBgn0016917, FBgn0003079, FBgn0003129, FBgn0002121, FBgn0034728, FBgn0005640, FBgn0261238, FBgn0029117, FBgn0004101, FBgn0001624, FBgn0024189, FBgn0004396, FBgn0003507, FBgn0004197, FBgn0035049, FBgn0000543, FBgn0011661, FBgn0030486	0.0857072
GO:0048870	cell motility	59	0.00782875	FBgn0010389, FBgn0033846, FBgn0001981, FBgn0003165, FBgn0020224, FBgn0029088, FBgn0026192, FBgn0016917, FBgn0010303, FBgn0010341, FBgn0035136, FBgn0027053, FBgn0031450, FBgn0000382, FBgn0013717, FBgn0000482, FBgn0011723, FBgn0004512, FBgn0046687, FBgn0000182, FBgn0086655, FBgn0027363, FBgn0004606, FBgn0000221, FBgn0001250, FBgn0015477, FBgn0003514, FBgn0004647, FBgn0003499, FBgn0004644, FBgn00202…	0.0857127
GO:0006727	ommochrome biosynthetic process	11	0.00790802	FBgn0000257, FBgn0003008, FBgn0003210, FBgn0001087, FBgn0000247, FBgn0086679, FBgn0002567, FBgn0002566, FBgn0000330, FBgn0000482, FBgn0003515	0.0862444
GO:0008055	ocellus pigment biosynthetic process	11	0.00790802	FBgn0000257, FBgn0003008, FBgn0003210, FBgn0001087, FBgn0000247, FBgn0086679, FBgn0002567, FBgn0002566, FBgn0000330, FBgn0000482, FBgn0003515	0.0862444
GO:0010948	negative regulation of cell cycle process	11	0.00790802	FBgn0031696, FBgn0000063, FBgn0003268, FBgn0004643, FBgn0011648, FBgn0035640, FBgn0000404, FBgn0015799, FBgn0001965, FBgn0061476, FBgn0003884	0.0862444
GO:0033060	ocellus pigmentation	11	0.00790802	FBgn0000257, FBgn0003008, FBgn0003210, FBgn0001087, FBgn0000247, FBgn0086679, FBgn0002567, FBgn0002566, FBgn0000330, FBgn0000482, FBgn0003515	0.0862444
GO:0046152	ommochrome metabolic process	11	0.00790802	FBgn0000257, FBgn0003008, FBgn0003210, FBgn0001087, FBgn0000247, FBgn0086679, FBgn0002567, FBgn0002566, FBgn0000330, FBgn0000482, FBgn0003515	0.0862444
GO:0046158	ocellus pigment metabolic process	11	0.00790802	FBgn0000257, FBgn0003008, FBgn0003210, FBgn0001087, FBgn0000247, FBgn0086679, FBgn0002567, FBgn0002566, FBgn0000330, FBgn0000482, FBgn0003515	0.0862444
GO:0051656	establishment of organelle localization	28	0.00802579	FBgn0011674, FBgn0000063, FBgn0030500, FBgn0040232, FBgn0003732, FBgn0000405, FBgn0031537, FBgn0023542, FBgn0003514, FBgn0013726, FBgn0027103, FBgn0013997, FBgn0033107, FBgn0002525, FBgn0004379, FBgn0019968, FBgn0040080, FBgn0033378, FBgn0001316, FBgn0015754, FBgn0039140, FBgn0013759, FBgn0001624, FBgn0021760, FBgn0029157, FBgn0087035, FBgn0010909, FBgn0000163	0.0871732
GO:0007219	Notch signaling pathway	23	0.00806135	FBgn0021874, FBgn0259212, FBgn0000221, FBgn0011591, FBgn0011224, FBgn0004647, FBgn0086694, FBgn0005410, FBgn0026320, FBgn0004837, FBgn0004197, FBgn0019947, FBgn0004858, FBgn0000180, FBgn0034722, FBgn0042641, FBgn0037218, FBgn0023444, FBgn0259174, FBgn0053198, FBgn0001169, FBgn0003371, FBgn0031005	0.0872417
GO:0006511	ubiquitin-dependent protein catabolic process	34	0.00807265	FBgn0000351, FBgn0036136, FBgn0031376, FBgn0010288, FBgn0032467, FBgn0039632, FBgn0016697, FBgn0025638, FBgn0033916, FBgn0033738, FBgn0050421, FBgn0016756, FBgn0039025, FBgn0028476, FBgn0052486, FBgn0029006, FBgn0039875, FBgn0037236, FBgn0034410, FBgn0003410, FBgn0002791, FBgn0032956, FBgn0013717, FBgn0261268, FBgn0250843, FBgn0015509, FBgn0032210, FBgn0086134, FBgn0030969, FBgn0032216, FBgn00524…	0.0870588
GO:0007447	imaginal disc pattern formation	34	0.00807265	FBgn0041604, FBgn0000179, FBgn0026411, FBgn0027594, FBgn0004647, FBgn0000497, FBgn0004644, FBgn0019947, FBgn0011758, FBgn0003317, FBgn0034071, FBgn0042641, FBgn0015816, FBgn0004889, FBgn0000083, FBgn0031005, FBgn0011648, FBgn0003053, FBgn0052133, FBgn0037700, FBgn0037021, FBgn0011591, FBgn0005410, FBgn0000014, FBgn0004837, FBgn0004197, FBgn0014037, FBgn0043364, FBgn0086655, FBgn0040071, FBgn00000…	0.0870588
GO:0008285	negative regulation of cell proliferation	14	0.00814258	FBgn0086384, FBgn0004583, FBgn0011676, FBgn0001624, FBgn0028397, FBgn0005198, FBgn0004595, FBgn0020306, FBgn0010300, FBgn0026317, FBgn0015799, FBgn0002121, FBgn0053193, FBgn0038197	0.0874813
GO:0007179	transforming growth factor beta receptor signaling pathway	12	0.00819354	FBgn0051232, FBgn0026369, FBgn0024250, FBgn0011648, FBgn0024846, FBgn0003317, FBgn0039914, FBgn0025800, FBgn0010341, FBgn0029006, FBgn0002121, FBgn0031461	0.0877061
GO:0040011	locomotion	75	0.00836634	FBgn0250876, FBgn0010389, FBgn0033846, FBgn0001981, FBgn0003165, FBgn0020224, FBgn0029088, FBgn0026192, FBgn0002526, FBgn0016917, FBgn0010303, FBgn0010341, FBgn0035136, FBgn0031450, FBgn0027053, FBgn0000382, FBgn0029117, FBgn0013717, FBgn0011823, FBgn0000482, FBgn0011723, FBgn0003423, FBgn0086906, FBgn0004179, FBgn0046687, FBgn0004512, FBgn0000182, FBgn0027363, FBgn0086655, FBgn0004606, FBgn00002…	0.0891741
GO:0007517	muscle organ development	46	0.0090488	FBgn0041203, FBgn0033988, FBgn0003887, FBgn0004606, FBgn0010389, FBgn0027538, FBgn0027620, FBgn0001250, FBgn0020388, FBgn0036239, FBgn0004647, FBgn0003499, FBgn0260003, FBgn0011771, FBgn0005427, FBgn0085436, FBgn0010280, FBgn0030330, FBgn0034155, FBgn0003292, FBgn0003371, FBgn0259108, FBgn0000629, FBgn0028427, FBgn0005634, FBgn0024189, FBgn0015014, FBgn0035754, FBgn0029094, FBgn0013733, FBgn00000…	0.0957949
GO:0045196	establishment or maintenance of neuroblast polarity	6	0.00912386	FBgn0026192, FBgn0001624, FBgn0005634, FBgn0002121, FBgn0067864, FBgn0000163	0.0962291
GO:0000090	mitotic anaphase	8	0.00920452	FBgn0002791, FBgn0025781, FBgn0026181, FBgn0041147, FBgn0040233, FBgn0052831, FBgn0000405, FBgn0004889, FBgn0034231	0.0967162
GO:0051674	localization of cell	61	0.00935397	FBgn0010389, FBgn0033846, FBgn0001981, FBgn0003165, FBgn0020224, FBgn0029088, FBgn0026192, FBgn0016917, FBgn0010303, FBgn0010341, FBgn0035136, FBgn0027053, FBgn0031450, FBgn0000382, FBgn0013717, FBgn0000482, FBgn0011723, FBgn0004512, FBgn0046687, FBgn0000182, FBgn0086655, FBgn0027363, FBgn0004606, FBgn0000221, FBgn0001250, FBgn0000117, FBgn0015477, FBgn0003514, FBgn0004647, FBgn0003499, FBgn00046…	0.0978867
GO:0019637	organophosphate metabolic process	34	0.00957722	FBgn0035265, FBgn0035266, FBgn0037743, FBgn0026619, FBgn0026576, FBgn0026718, FBgn0052699, FBgn0037010, FBgn0086448, FBgn0052380, FBgn0028741, FBgn0034789, FBgn0037339, FBgn0015278, FBgn0022160, FBgn0015277, FBgn0003218, FBgn0035435, FBgn0029789, FBgn0030670, FBgn0004373, FBgn0000536, FBgn0034270, FBgn0035392, FBgn0250862, FBgn0030035, FBgn0039924, FBgn0030465, FBgn0053116, FBgn0039360, FBgn00300…	0.0997807
GO:0006950	response to stress	134	0.00973622	FBgn0001179, FBgn0034366, FBgn0038704, FBgn0050467, FBgn0045443, FBgn0027914, FBgn0026869, FBgn0032698, FBgn0010303, FBgn0015553, FBgn0037544, FBgn0037873, FBgn0030766, FBgn0001168, FBgn0037141, FBgn0022355, FBgn0025697, FBgn0024846, FBgn0044323, FBgn0014018, FBgn0015546, FBgn0034976, FBgn0032210, FBgn0004698, FBgn0038570, FBgn0039164, FBgn0038035, FBgn0035290, FBgn0029798, FBgn0034219, FBgn00866…	0.101023
GO:0000087	M phase of mitotic cell cycle	48	0.00988064	FBgn0002914, FBgn0025781, FBgn0040233, FBgn0000404, FBgn0040232, FBgn0000405, FBgn0014029, FBgn0052438, FBgn0003165, FBgn0259791, FBgn0021825, FBgn0015391, FBgn0027783, FBgn0035640, FBgn0032698, FBgn0014127, FBgn0002791, FBgn0034878, FBgn0024227, FBgn0002924, FBgn0003525, FBgn0003268, FBgn0086906, FBgn0015925, FBgn0026433, FBgn0030500, FBgn0035766, FBgn0003732, FBgn0011207, FBgn0002878, FBgn00046…	0.102112
GO:0010639	negative regulation of organelle organization	16	0.0103215	FBgn0000063, FBgn0031696, FBgn0024689, FBgn0000404, FBgn0021760, FBgn0013733, FBgn0029157, FBgn0003268, FBgn0004643, FBgn0035640, FBgn0250789, FBgn0061476, FBgn0250788, FBgn0004373, FBgn0053822, FBgn0003884	0.106092
GO:0048589	developmental growth	29	0.0107462	FBgn0041203, FBgn0033159, FBgn0000117, FBgn0001075, FBgn0004647, FBgn0011204, FBgn0003612, FBgn0004644, FBgn0011771, FBgn0002413, FBgn0000479, FBgn0010303, FBgn0003371, FBgn0002774, FBgn0032475, FBgn0259212, FBgn0039532, FBgn0001085, FBgn0000723, FBgn0041191, FBgn0015907, FBgn0003380, FBgn0039213, FBgn0003659, FBgn0011230, FBgn0035049, FBgn0015544, FBgn0086676, FBgn0086655	0.109871
GO:0051322	anaphase	9	0.0107854	FBgn0004643, FBgn0002791, FBgn0025781, FBgn0026181, FBgn0041147, FBgn0040233, FBgn0052831, FBgn0000405, FBgn0004889, FBgn0034231	0.109894
GO:0007224	smoothened signaling pathway	15	0.0108784	FBgn0041604, FBgn0015024, FBgn0025638, FBgn0001079, FBgn0029088, FBgn0053207, FBgn0002174, FBgn0004644, FBgn0011692, FBgn0005355, FBgn0034081, FBgn0020245, FBgn0003659, FBgn0036974, FBgn0039709	0.110434
GO:0003006	reproductive developmental process	140	0.0113267	FBgn0002914, FBgn0010389, FBgn0033846, FBgn0027538, FBgn0001276, FBgn0003165, FBgn0020224, FBgn0011224, FBgn0026206, FBgn0001079, FBgn0041161, FBgn0002525, FBgn0010303, FBgn0010382, FBgn0003371, FBgn0033378, FBgn0011823, FBgn0011236, FBgn0000146, FBgn0002926, FBgn0003654, FBgn0014388, FBgn0010109, FBgn0015925, FBgn0259243, FBgn0011230, FBgn0003659, FBgn0011232, FBgn0046687, FBgn0023172, FBgn00395…	0.11437
GO:0030261	chromosome condensation	14	0.0113758	FBgn0024227, FBgn0027835, FBgn0003732, FBgn0017577, FBgn0003612, FBgn0027783, FBgn0015391, FBgn0086906, FBgn0259876, FBgn0014861, FBgn0014127, FBgn0015270, FBgn0039680, FBgn0004374	0.114471
GO:0006397	mRNA processing	60	0.0114431	FBgn0033842, FBgn0040235, FBgn0031493, FBgn0031492, FBgn0036733, FBgn0005649, FBgn0036734, FBgn0039977, FBgn0035692, FBgn0052533, FBgn0011224, FBgn0003435, FBgn0031628, FBgn0038344, FBgn0031868, FBgn0027784, FBgn0028474, FBgn0036314, FBgn0035136, FBgn0037255, FBgn0033378, FBgn0011666, FBgn0034065, FBgn0028554, FBgn0039867, FBgn0022942, FBgn0003321, FBgn0000662, FBgn0040286, FBgn0038934, FBgn00331…	0.114744
GO:0030010	establishment of cell polarity	10	0.0116523	FBgn0015331, FBgn0001624, FBgn0005634, FBgn0001085, FBgn0002121, FBgn0001075, FBgn0000163, FBgn0019968, FBgn0040080, FBgn0000497	0.116356
GO:0006644	phospholipid metabolic process	30	0.0117258	FBgn0035265, FBgn0037743, FBgn0026619, FBgn0026576, FBgn0026718, FBgn0052699, FBgn0037010, FBgn0086448, FBgn0052380, FBgn0028741, FBgn0034789, FBgn0037339, FBgn0015278, FBgn0015277, FBgn0003218, FBgn0035435, FBgn0029789, FBgn0030670, FBgn0004373, FBgn0000536, FBgn0034270, FBgn0250862, FBgn0030035, FBgn0039924, FBgn0030465, FBgn0053116, FBgn0039360, FBgn0030013, FBgn0010350, FBgn0025885	0.116679
GO:0042051	compound eye photoreceptor development	21	0.0119693	FBgn0015790, FBgn0000313, FBgn0001316, FBgn0026252, FBgn0000414, FBgn0044323, FBgn0023489, FBgn0003310, FBgn0261397, FBgn0004647, FBgn0013726, FBgn0033179, FBgn0016081, FBgn0040294, FBgn0000097, FBgn0005619, FBgn0086677, FBgn0011661, FBgn0000320, FBgn0003118, FBgn0259220	0.118592
GO:0007067	mitosis	47	0.0123482	FBgn0002914, FBgn0030500, FBgn0025781, FBgn0026433, FBgn0000404, FBgn0035766, FBgn0040233, FBgn0040232, FBgn0003732, FBgn0014029, FBgn0000405, FBgn0011207, FBgn0002878, FBgn0003165, FBgn0052438, FBgn0021825, FBgn0259791, FBgn0004643, FBgn0035640, FBgn0027783, FBgn0015391, FBgn0041147, FBgn0259876, FBgn0032698, FBgn0061476, FBgn0014127, FBgn0015270, FBgn0004374, FBgn0004379, FBgn0004889, FBgn00342…	0.121745
GO:0030030	cell projection organization	104	0.01277	FBgn0041604, FBgn0250876, FBgn0003165, FBgn0014163, FBgn0001075, FBgn0003435, FBgn0002526, FBgn0002413, FBgn0010303, FBgn0010280, FBgn0030330, FBgn0259108, FBgn0000629, FBgn0261268, FBgn0015014, FBgn0035754, FBgn0029094, FBgn0010109, FBgn0035357, FBgn0086655, FBgn0086680, FBgn0004606, FBgn0001250, FBgn0020388, FBgn0033159, FBgn0024277, FBgn0024273, FBgn0086356, FBgn0014001, FBgn0002774, FBgn00249…	0.125265
GO:0009893	positive regulation of metabolic process	52	0.012955	FBgn0003687, FBgn0001276, FBgn0001981, FBgn0003165, FBgn0011836, FBgn0000139, FBgn0034650, FBgn0040273, FBgn0038046, FBgn0013799, FBgn0010280, FBgn0042085, FBgn0028974, FBgn0013753, FBgn0038578, FBgn0014018, FBgn0013717, FBgn0015014, FBgn0026323, FBgn0000146, FBgn0005410, FBgn0022787, FBgn0011763, FBgn0004795, FBgn0033782, FBgn0037657, FBgn0043364, FBgn0030093, FBgn0040071, FBgn0010247, FBgn00003…	0.126576
GO:0048190	wing disc dorsal/ventral pattern formation	20	0.0130118	FBgn0041604, FBgn0003053, FBgn0037700, FBgn0037021, FBgn0027594, FBgn0011591, FBgn0004647, FBgn0005410, FBgn0004837, FBgn0019947, FBgn0034071, FBgn0014037, FBgn0043364, FBgn0015816, FBgn0000083, FBgn0000099, FBgn0001169, FBgn0040071, FBgn0031005, FBgn0003118	0.126705
GO:0035295	tube development	34	0.0132791	FBgn0015000, FBgn0001981, FBgn0001250, FBgn0000117, FBgn0038755, FBgn0031537, FBgn0026207, FBgn0038947, FBgn0002525, FBgn0003079, FBgn0001965, FBgn0014127, FBgn0000382, FBgn0014135, FBgn0019662, FBgn0001168, FBgn0001316, FBgn0004101, FBgn0005634, FBgn0015296, FBgn0003507, FBgn0013733, FBgn0010516, FBgn0021818, FBgn0000014, FBgn0011723, FBgn0014388, FBgn0003944, FBgn0037917, FBgn0001205, FBgn00103…	0.128751
GO:0000904	cell morphogenesis involved in differentiation	88	0.0133513	FBgn0041604, FBgn0250876, FBgn0001139, FBgn0003165, FBgn0014163, FBgn0001075, FBgn0003435, FBgn0002526, FBgn0085436, FBgn0011771, FBgn0016917, FBgn0000479, FBgn0010303, FBgn0010341, FBgn0010280, FBgn0030330, FBgn0000173, FBgn0010238, FBgn0040324, FBgn0027053, FBgn0259108, FBgn0000629, FBgn0261268, FBgn0013717, FBgn0015014, FBgn0035754, FBgn0029094, FBgn0029157, FBgn0004595, FBgn0000723, FBgn00101…	0.129011
GO:0001522	pseudouridine synthesis	7	0.0134672	FBgn0259937, FBgn0083976, FBgn0083992, FBgn0011824, FBgn0029148, FBgn0035901, FBgn0051719, FBgn0034703	0.129664
GO:0007094	mitotic cell cycle spindle assembly checkpoint	7	0.0134672	FBgn0031696, FBgn0000063, FBgn0003268, FBgn0004643, FBgn0035640, FBgn0061476, FBgn0003884	0.129664
GO:0031396	regulation of protein ubiquitination	7	0.0134672	FBgn0000351, FBgn0000257, FBgn0043458, FBgn0003210, FBgn0052672, FBgn0038286, FBgn0034542	0.129664
GO:0031577	spindle checkpoint	7	0.0134672	FBgn0031696, FBgn0000063, FBgn0003268, FBgn0004643, FBgn0035640, FBgn0061476, FBgn0003884	0.129664
GO:0035078	induction of programmed cell death by ecdysone	7	0.0134672	FBgn0013948, FBgn0000210, FBgn0037770, FBgn0000568, FBgn0005634, FBgn0002121, FBgn0000546	0.129664
GO:0048667	cell morphogenesis involved in neuron differentiation	84	0.0140063	FBgn0041604, FBgn0250876, FBgn0001139, FBgn0003165, FBgn0014163, FBgn0003435, FBgn0002526, FBgn0085436, FBgn0011771, FBgn0000479, FBgn0010303, FBgn0010341, FBgn0010280, FBgn0030330, FBgn0000173, FBgn0010238, FBgn0040324, FBgn0027053, FBgn0259108, FBgn0000629, FBgn0261268, FBgn0013717, FBgn0015014, FBgn0035754, FBgn0029094, FBgn0029157, FBgn0004595, FBgn0000723, FBgn0010109, FBgn0004795, FBgn00160…	0.134115
GO:0006325	chromatin organization	53	0.0150178	FBgn0025682, FBgn0000139, FBgn0027378, FBgn0053822, FBgn0034410, FBgn0039067, FBgn0024227, FBgn0000629, FBgn0013717, FBgn0040078, FBgn0038576, FBgn0016687, FBgn0029094, FBgn0004828, FBgn0014340, FBgn0016685, FBgn0030054, FBgn0014879, FBgn0031873, FBgn0039559, FBgn0030093, FBgn0037834, FBgn0086655, FBgn0030486, FBgn0040071, FBgn0010247, FBgn0010520, FBgn0027620, FBgn0020388, FBgn0086899, FBgn00538…	0.14271
GO:0034728	nucleosome organization	18	0.0153222	FBgn0000541, FBgn0040078, FBgn0027620, FBgn0016687, FBgn0029094, FBgn0004828, FBgn0053808, FBgn0002887, FBgn0016685, FBgn0020306, FBgn0030054, FBgn0015268, FBgn0053857, FBgn0014879, FBgn0053896, FBgn0027378, FBgn0031873, FBgn0053822, FBgn0043002	0.144966
GO:0001736	establishment of planar polarity	23	0.0154259	FBgn0041203, FBgn0003053, FBgn0026252, FBgn0259212, FBgn0005634, FBgn0001085, FBgn0026323, FBgn0001075, FBgn0004647, FBgn0003514, FBgn0000497, FBgn0026320, FBgn0014388, FBgn0015778, FBgn0026181, FBgn0002413, FBgn0010303, FBgn0010909, FBgn0001297, FBgn0052179, FBgn0043364, FBgn0067864, FBgn0015904	0.145443
GO:0048747	muscle fiber development	14	0.0155196	FBgn0041203, FBgn0000210, FBgn0259108, FBgn0010389, FBgn0027538, FBgn0014388, FBgn0011771, FBgn0039213, FBgn0000097, FBgn0001123, FBgn0086676, FBgn0034155, FBgn0003371, FBgn0003118	0.145829
GO:0008361	regulation of cell size	27	0.0155507	FBgn0040230, FBgn0033159, FBgn0020386, FBgn0011204, FBgn0086706, FBgn0037647, FBgn0021796, FBgn0011771, FBgn0026317, FBgn0002413, FBgn0000479, FBgn0010303, FBgn0037874, FBgn0024913, FBgn0002774, FBgn0259212, FBgn0039532, FBgn0001085, FBgn0011787, FBgn0005198, FBgn0010315, FBgn0000723, FBgn0041191, FBgn0003380, FBgn0011230, FBgn0015806, FBgn0038197	0.145667
GO:0035070	salivary gland histolysis	25	0.0155971	FBgn0028360, FBgn0015239, FBgn0027932, FBgn0024252, FBgn0037270, FBgn0002121, FBgn0000210, FBgn0025697, FBgn0010435, FBgn0037700, FBgn0005634, FBgn0035107, FBgn0015795, FBgn0087035, FBgn0013948, FBgn0000568, FBgn0010709, FBgn0036974, FBgn0035049, FBgn0000565, FBgn0013770, FBgn0043364, FBgn0029176, FBgn0000546, FBgn0259220	0.145639
GO:0035071	salivary gland cell autophagic cell death	25	0.0155971	FBgn0028360, FBgn0015239, FBgn0027932, FBgn0024252, FBgn0037270, FBgn0002121, FBgn0000210, FBgn0025697, FBgn0010435, FBgn0037700, FBgn0005634, FBgn0035107, FBgn0015795, FBgn0087035, FBgn0013948, FBgn0000568, FBgn0010709, FBgn0036974, FBgn0035049, FBgn0000565, FBgn0013770, FBgn0043364, FBgn0029176, FBgn0000546, FBgn0259220	0.145639
GO:0035222	wing disc pattern formation	25	0.0155971	FBgn0000179, FBgn0041604, FBgn0027594, FBgn0004647, FBgn0000497, FBgn0004644, FBgn0019947, FBgn0034071, FBgn0015816, FBgn0000083, FBgn0031005, FBgn0011648, FBgn0003053, FBgn0037700, FBgn0037021, FBgn0011591, FBgn0005410, FBgn0004837, FBgn0014037, FBgn0043364, FBgn0000099, FBgn0040071, FBgn0001169, FBgn0003118, FBgn0039709	0.145639
GO:0048102	autophagic cell death	25	0.0155971	FBgn0028360, FBgn0015239, FBgn0027932, FBgn0024252, FBgn0037270, FBgn0002121, FBgn0000210, FBgn0025697, FBgn0010435, FBgn0037700, FBgn0005634, FBgn0035107, FBgn0015795, FBgn0087035, FBgn0013948, FBgn0000568, FBgn0010709, FBgn0036974, FBgn0035049, FBgn0000565, FBgn0013770, FBgn0043364, FBgn0029176, FBgn0000546, FBgn0259220	0.145639
GO:0060341	regulation of cellular localization	25	0.0155971	FBgn0010391, FBgn0002736, FBgn0026207, FBgn0013343, FBgn0261014, FBgn0011692, FBgn0004644, FBgn0260003, FBgn0041161, FBgn0005355, FBgn0002413, FBgn0023423, FBgn0003371, FBgn0033378, FBgn0015790, FBgn0053653, FBgn0004574, FBgn0004242, FBgn0033876, FBgn0000146, FBgn0015614, FBgn0004838, FBgn0041585, FBgn0045073, FBgn0053547	0.145639
GO:0080134	regulation of response to stress	25	0.0155971	FBgn0028546, FBgn0015286, FBgn0000117, FBgn0004647, FBgn0028990, FBgn0020381, FBgn0038928, FBgn0010303, FBgn0041100, FBgn0086378, FBgn0003053, FBgn0044323, FBgn0259212, FBgn0024846, FBgn0014018, FBgn0026323, FBgn0022787, FBgn0013983, FBgn0034647, FBgn0040281, FBgn0029798, FBgn0039338, FBgn0024326, FBgn0035976, FBgn0010247	0.145639
GO:0006928	cell motion	88	0.0158609	FBgn0041604, FBgn0010389, FBgn0250876, FBgn0033846, FBgn0001981, FBgn0003165, FBgn0020224, FBgn0029088, FBgn0003435, FBgn0026192, FBgn0002526, FBgn0016917, FBgn0010303, FBgn0010341, FBgn0035136, FBgn0040324, FBgn0031450, FBgn0027053, FBgn0000382, FBgn0000629, FBgn0013717, FBgn0000482, FBgn0000723, FBgn0011723, FBgn0004795, FBgn0016061, FBgn0046687, FBgn0004512, FBgn0000182, FBgn0027363, FBgn00866…	0.147493
GO:0000280	nuclear division	47	0.0159138	FBgn0002914, FBgn0030500, FBgn0025781, FBgn0026433, FBgn0000404, FBgn0035766, FBgn0040233, FBgn0040232, FBgn0003732, FBgn0014029, FBgn0000405, FBgn0011207, FBgn0002878, FBgn0003165, FBgn0052438, FBgn0021825, FBgn0259791, FBgn0004643, FBgn0035640, FBgn0027783, FBgn0015391, FBgn0041147, FBgn0259876, FBgn0032698, FBgn0061476, FBgn0014127, FBgn0015270, FBgn0004374, FBgn0004379, FBgn0004889, FBgn00342…	0.147516
GO:0031325	positive regulation of cellular metabolic process	51	0.0159576	FBgn0003687, FBgn0001276, FBgn0001981, FBgn0003165, FBgn0011836, FBgn0000139, FBgn0034650, FBgn0040273, FBgn0038046, FBgn0013799, FBgn0010280, FBgn0042085, FBgn0028974, FBgn0013753, FBgn0038578, FBgn0014018, FBgn0013717, FBgn0015014, FBgn0026323, FBgn0000146, FBgn0005410, FBgn0022787, FBgn0033782, FBgn0004795, FBgn0037657, FBgn0043364, FBgn0030093, FBgn0040071, FBgn0010247, FBgn0000351, FBgn00105…	0.14746
GO:0045839	negative regulation of mitosis	8	0.0159965	FBgn0031696, FBgn0000063, FBgn0003268, FBgn0004643, FBgn0035640, FBgn0000404, FBgn0061476, FBgn0003884	0.147363
GO:0051784	negative regulation of nuclear division	8	0.0159965	FBgn0031696, FBgn0000063, FBgn0003268, FBgn0004643, FBgn0035640, FBgn0000404, FBgn0061476, FBgn0003884	0.147363
GO:0016333	morphogenesis of follicular epithelium	13	0.0163435	FBgn0028992, FBgn0000382, FBgn0000221, FBgn0001624, FBgn0020224, FBgn0004647, FBgn0011763, FBgn0003079, FBgn0002121, FBgn0067864, FBgn0023423, FBgn0001404, FBgn0020278	0.149894
GO:0046483	heterocycle metabolic process	74	0.0163939	FBgn0025640, FBgn0028665, FBgn0000447, FBgn0030066, FBgn0003189, FBgn0028662, FBgn0030029, FBgn0000109, FBgn0052626, FBgn0004087, FBgn0031824, FBgn0004901, FBgn0085384, FBgn0064126, FBgn0034067, FBgn0000247, FBgn0002921, FBgn0002567, FBgn0002566, FBgn0261360, FBgn0037146, FBgn0000482, FBgn0037513, FBgn0022709, FBgn0003423, FBgn0000527, FBgn0000330, FBgn0022097, FBgn0034261, FBgn0000257, FBgn00032…	0.149888
GO:0048812	neuron projection morphogenesis	83	0.0165398	FBgn0041604, FBgn0250876, FBgn0001139, FBgn0003165, FBgn0014163, FBgn0003435, FBgn0002526, FBgn0085436, FBgn0011771, FBgn0000479, FBgn0010303, FBgn0010341, FBgn0010280, FBgn0030330, FBgn0000173, FBgn0010238, FBgn0040324, FBgn0027053, FBgn0259108, FBgn0000629, FBgn0261268, FBgn0013717, FBgn0015014, FBgn0035754, FBgn0029094, FBgn0029157, FBgn0004595, FBgn0000723, FBgn0010109, FBgn0004795, FBgn00160…	0.15069
GO:0006629	lipid metabolic process	85	0.0168407	FBgn0032265, FBgn0001941, FBgn0032264, FBgn0037743, FBgn0026619, FBgn0026718, FBgn0066101, FBgn0037010, FBgn0033883, FBgn0034789, FBgn0032603, FBgn0026317, FBgn0040001, FBgn0039774, FBgn0039639, FBgn0029789, FBgn0030670, FBgn0051522, FBgn0051871, FBgn0025697, FBgn0037044, FBgn0024320, FBgn0030683, FBgn0029906, FBgn0005198, FBgn0035914, FBgn0034491, FBgn0035811, FBgn0039924, FBgn0053116, FBgn00303…	0.152791
GO:0033227	dsRNA transport	12	0.0170422	FBgn0038950, FBgn0038810, FBgn0030674, FBgn0039016, FBgn0015277, FBgn0027779, FBgn0026634, FBgn0002566, FBgn0034794, FBgn0015795, FBgn0001404, FBgn0087035	0.154042
GO:0019748	secondary metabolic process	26	0.017094	FBgn0000257, FBgn0023477, FBgn0003210, FBgn0028841, FBgn0001098, FBgn0003515, FBgn0028990, FBgn0002937, FBgn0003008, FBgn0086687, FBgn0031693, FBgn0034405, FBgn0025697, FBgn0000629, FBgn0001087, FBgn0000247, FBgn0002567, FBgn0030239, FBgn0002566, FBgn0000482, FBgn0050410, FBgn0004034, FBgn0086679, FBgn0000527, FBgn0000330, FBgn0000543	0.154036
GO:0008345	larval locomotory behavior	9	0.0172512	FBgn0010109, FBgn0003380, FBgn0010329, FBgn0004242, FBgn0000721, FBgn0027594, FBgn0028734, FBgn0034155, FBgn0000546	0.154905
GO:0044264	cellular polysaccharide metabolic process	9	0.0172512	FBgn0011754, FBgn0034618, FBgn0051915, FBgn0020245, FBgn0031995, FBgn0034081, FBgn0038293, FBgn0038197, FBgn0030087	0.154905
GO:0007280	pole cell migration	10	0.017662	FBgn0011723, FBgn0000014, FBgn0004644, FBgn0004606, FBgn0010389, FBgn0001205, FBgn0003165, FBgn0046687, FBgn0000320, FBgn0029088	0.157868
GO:0002168	instar larval development	19	0.0178278	FBgn0028992, FBgn0029117, FBgn0004101, FBgn0001624, FBgn0004396, FBgn0011509, FBgn0038947, FBgn0004644, FBgn0004197, FBgn0035049, FBgn0250789, FBgn0003079, FBgn0002121, FBgn0000543, FBgn0034728, FBgn0011661, FBgn0005640, FBgn0030486, FBgn0261238	0.158789
GO:0008654	phospholipid biosynthetic process	19	0.0178278	FBgn0035265, FBgn0037743, FBgn0026619, FBgn0026576, FBgn0026718, FBgn0052699, FBgn0030035, FBgn0037010, FBgn0052380, FBgn0086448, FBgn0030465, FBgn0053116, FBgn0039360, FBgn0035435, FBgn0030670, FBgn0010350, FBgn0025885, FBgn0000536, FBgn0034270	0.158789
GO:0031175	neuron projection development	83	0.0180341	FBgn0041604, FBgn0250876, FBgn0001139, FBgn0003165, FBgn0014163, FBgn0003435, FBgn0002526, FBgn0085436, FBgn0011771, FBgn0000479, FBgn0010303, FBgn0010341, FBgn0010280, FBgn0030330, FBgn0000173, FBgn0010238, FBgn0040324, FBgn0027053, FBgn0259108, FBgn0000629, FBgn0261268, FBgn0013717, FBgn0015014, FBgn0035754, FBgn0029094, FBgn0029157, FBgn0004595, FBgn0000723, FBgn0010109, FBgn0004795, FBgn00160…	0.160035
GO:0007015	actin filament organization	29	0.0181657	FBgn0000256, FBgn0001139, FBgn0023081, FBgn0003475, FBgn0025641, FBgn0259678, FBgn0004647, FBgn0024273, FBgn0003317, FBgn0010341, FBgn0010303, FBgn0001965, FBgn0037028, FBgn0044826, FBgn0243516, FBgn0039532, FBgn0016700, FBgn0003447, FBgn0004638, FBgn0001105, FBgn0039924, FBgn0000723, FBgn0025455, FBgn0259243, FBgn0000667, FBgn0038206, FBgn0015806, FBgn0023172, FBgn0031781	0.160662
GO:0044271	nitrogen compound biosynthetic process	69	0.0185271	FBgn0011676, FBgn0041607, FBgn0028665, FBgn0000447, FBgn0030066, FBgn0003189, FBgn0028662, FBgn0000303, FBgn0053958, FBgn0000109, FBgn0052626, FBgn0004087, FBgn0004901, FBgn0051719, FBgn0052068, FBgn0001125, FBgn0002921, FBgn0031589, FBgn0019932, FBgn0261360, FBgn0037146, FBgn0000482, FBgn0003423, FBgn0037305, FBgn0034568, FBgn0005619, FBgn0022097, FBgn0001124, FBgn0034261, FBgn0036000, FBgn00864…	0.163153
GO:0009891	positive regulation of biosynthetic process	48	0.018536	FBgn0003687, FBgn0010520, FBgn0001276, FBgn0001981, FBgn0000117, FBgn0003165, FBgn0011836, FBgn0004647, FBgn0000139, FBgn0034650, FBgn0020381, FBgn0040273, FBgn0038046, FBgn0038928, FBgn0013799, FBgn0010280, FBgn0042085, FBgn0028974, FBgn0005630, FBgn0027835, FBgn0013753, FBgn0038578, FBgn0010356, FBgn0013717, FBgn0014018, FBgn0015014, FBgn0026323, FBgn0003507, FBgn0000146, FBgn0022787, FBgn00054…	0.162772
GO:0031328	positive regulation of cellular biosynthetic process	48	0.018536	FBgn0003687, FBgn0010520, FBgn0001276, FBgn0001981, FBgn0000117, FBgn0003165, FBgn0011836, FBgn0004647, FBgn0000139, FBgn0034650, FBgn0020381, FBgn0040273, FBgn0038046, FBgn0038928, FBgn0013799, FBgn0010280, FBgn0042085, FBgn0028974, FBgn0005630, FBgn0027835, FBgn0013753, FBgn0038578, FBgn0010356, FBgn0013717, FBgn0014018, FBgn0015014, FBgn0026323, FBgn0003507, FBgn0000146, FBgn0022787, FBgn00054…	0.162772
GO:0002682	regulation of immune system process	23	0.0188103	FBgn0024846, FBgn0014018, FBgn0026323, FBgn0003507, FBgn0004647, FBgn0011764, FBgn0028990, FBgn0022787, FBgn0013983, FBgn0020381, FBgn0034647, FBgn0004197, FBgn0020306, FBgn0016917, FBgn0085432, FBgn0038928, FBgn0010303, FBgn0000097, FBgn0013799, FBgn0003371, FBgn0035976, FBgn0010247, FBgn0003118	0.164535
GO:0007164	establishment of tissue polarity	23	0.0188103	FBgn0041203, FBgn0003053, FBgn0026252, FBgn0259212, FBgn0005634, FBgn0001085, FBgn0026323, FBgn0001075, FBgn0004647, FBgn0003514, FBgn0000497, FBgn0026320, FBgn0014388, FBgn0015778, FBgn0026181, FBgn0002413, FBgn0010303, FBgn0010909, FBgn0001297, FBgn0052179, FBgn0043364, FBgn0067864, FBgn0015904	0.164535
GO:0010604	positive regulation of macromolecule metabolic process	45	0.0190784	FBgn0000351, FBgn0003687, FBgn0010520, FBgn0001981, FBgn0001276, FBgn0000117, FBgn0003165, FBgn0011836, FBgn0004647, FBgn0000139, FBgn0034650, FBgn0040273, FBgn0038046, FBgn0034722, FBgn0013799, FBgn0010280, FBgn0259174, FBgn0042085, FBgn0028974, FBgn0005630, FBgn0027835, FBgn0013753, FBgn0038578, FBgn0010356, FBgn0013717, FBgn0014018, FBgn0015014, FBgn0003507, FBgn0000146, FBgn0005410, FBgn00011…	0.166234
GO:0032990	cell part morphogenesis	94	0.0194432	FBgn0041604, FBgn0261276, FBgn0250876, FBgn0001139, FBgn0003165, FBgn0014163, FBgn0029891, FBgn0003435, FBgn0002526, FBgn0085436, FBgn0011771, FBgn0034452, FBgn0000479, FBgn0010303, FBgn0010341, FBgn0010280, FBgn0030330, FBgn0000173, FBgn0010238, FBgn0040324, FBgn0027053, FBgn0031829, FBgn0259108, FBgn0000629, FBgn0261268, FBgn0013717, FBgn0015014, FBgn0035754, FBgn0029094, FBgn0029157, FBgn00045…	0.168692
GO:0033365	protein localization in organelle	31	0.020658	FBgn0010391, FBgn0038808, FBgn0067628, FBgn0031456, FBgn0024921, FBgn0036928, FBgn0003310, FBgn0011509, FBgn0026207, FBgn0004644, FBgn0026170, FBgn0083968, FBgn0034535, FBgn0033052, FBgn0001337, FBgn0027358, FBgn0030669, FBgn0020497, FBgn0026252, FBgn0010638, FBgn0011823, FBgn0015298, FBgn0013756, FBgn0020647, FBgn0038810, FBgn0014877, FBgn0027360, FBgn0042177, FBgn0016041, FBgn0032397, FBgn00102…	0.177848
GO:0016337	cell-cell adhesion	22	0.0206629	FBgn0000313, FBgn0000221, FBgn0038439, FBgn0024189, FBgn0001085, FBgn0001250, FBgn0261053, FBgn0000117, FBgn0039928, FBgn0001075, FBgn0004647, FBgn0037963, FBgn0000497, FBgn0019947, FBgn0034005, FBgn0000180, FBgn0250789, FBgn0010238, FBgn0000163, FBgn0001404, FBgn0003118, FBgn0039709	0.177405
GO:0001763	morphogenesis of a branching structure	17	0.021172	FBgn0000382, FBgn0014135, FBgn0004101, FBgn0001981, FBgn0000117, FBgn0038755, FBgn0031537, FBgn0013733, FBgn0026207, FBgn0001180, FBgn0014388, FBgn0002525, FBgn0003079, FBgn0037917, FBgn0010350, FBgn0010452, FBgn0003118	0.180906
GO:0007088	regulation of mitosis	17	0.021172	FBgn0002914, FBgn0031696, FBgn0000063, FBgn0025781, FBgn0000404, FBgn0003525, FBgn0031107, FBgn0003268, FBgn0004643, FBgn0035640, FBgn0011606, FBgn0061476, FBgn0003884, FBgn0004889, FBgn0034231, FBgn0023423, FBgn0030600	0.180906
GO:0051783	regulation of nuclear division	17	0.021172	FBgn0002914, FBgn0031696, FBgn0000063, FBgn0025781, FBgn0000404, FBgn0003525, FBgn0031107, FBgn0003268, FBgn0004643, FBgn0035640, FBgn0011606, FBgn0061476, FBgn0003884, FBgn0004889, FBgn0034231, FBgn0023423, FBgn0030600	0.180906
GO:0007611	learning or memory	27	0.0220115	FBgn0033039, FBgn0023479, FBgn0010329, FBgn0000422, FBgn0086370, FBgn0003165, FBgn0004647, FBgn0053207, FBgn0000479, FBgn0000536, FBgn0023423, FBgn0003371, FBgn0014467, FBgn0259108, FBgn0259481, FBgn0002567, FBgn0004638, FBgn0045823, FBgn0003321, FBgn0003380, FBgn0259243, FBgn0038934, FBgn0036697, FBgn0000721, FBgn0061469, FBgn0005654, FBgn0001123	0.186932
GO:0046148	pigment biosynthetic process	21	0.0227021	FBgn0000257, FBgn0003210, FBgn0025697, FBgn0020018, FBgn0000247, FBgn0001087, FBgn0002567, FBgn0002566, FBgn0000482, FBgn0003515, FBgn0002937, FBgn0003008, FBgn0033428, FBgn0000109, FBgn0004034, FBgn0086679, FBgn0000527, FBgn0000330, FBgn0021944, FBgn0004901, FBgn0023536	0.191743
GO:0007422	peripheral nervous system development	30	0.0227376	FBgn0011674, FBgn0086680, FBgn0000404, FBgn0001981, FBgn0033159, FBgn0003310, FBgn0024277, FBgn0000137, FBgn0086694, FBgn0259791, FBgn0004647, FBgn0011692, FBgn0013997, FBgn0002526, FBgn0015391, FBgn0015372, FBgn0014127, FBgn0010382, FBgn0001987, FBgn0001624, FBgn0003525, FBgn0023097, FBgn0004595, FBgn0000014, FBgn0022764, FBgn0010473, FBgn0086676, FBgn0029174, FBgn0000546, FBgn0003118	0.191505
GO:0007281	germ cell development	71	0.0228407	FBgn0024689, FBgn0026619, FBgn0027538, FBgn0003475, FBgn0003165, FBgn0011224, FBgn0026206, FBgn0041161, FBgn0026192, FBgn0024252, FBgn0011771, FBgn0016917, FBgn0027053, FBgn0033378, FBgn0086384, FBgn0011666, FBgn0011823, FBgn0000146, FBgn0002926, FBgn0003654, FBgn0015925, FBgn0259243, FBgn0011230, FBgn0003659, FBgn0026238, FBgn0011232, FBgn0004510, FBgn0003891, FBgn0046687, FBgn0011661, FBgn00284…	0.191784
GO:0048754	branching morphogenesis of a tube	16	0.0230329	FBgn0000382, FBgn0014135, FBgn0004101, FBgn0001981, FBgn0000117, FBgn0038755, FBgn0031537, FBgn0013733, FBgn0026207, FBgn0014388, FBgn0002525, FBgn0003079, FBgn0037917, FBgn0010350, FBgn0010452, FBgn0003118	0.192738
GO:0060446	branching involved in open tracheal system development	16	0.0230329	FBgn0000382, FBgn0014135, FBgn0004101, FBgn0001981, FBgn0000117, FBgn0038755, FBgn0031537, FBgn0013733, FBgn0026207, FBgn0014388, FBgn0002525, FBgn0003079, FBgn0037917, FBgn0010350, FBgn0010452, FBgn0003118	0.192738
GO:0033014	tetrapyrrole biosynthetic process	7	0.0238834	FBgn0033428, FBgn0010786, FBgn0036271, FBgn0020018, FBgn0021944, FBgn0030066, FBgn0023536	0.19865
GO:0035081	induction of programmed cell death by hormones	7	0.0238834	FBgn0013948, FBgn0000210, FBgn0037770, FBgn0000568, FBgn0005634, FBgn0002121, FBgn0000546	0.19865
GO:0045186	zonula adherens assembly	7	0.0238834	FBgn0026192, FBgn0001624, FBgn0004167, FBgn0002121, FBgn0000117, FBgn0067864, FBgn0000163	0.19865
GO:0001709	cell fate determination	41	0.0242793	FBgn0011674, FBgn0086680, FBgn0010389, FBgn0031399, FBgn0001981, FBgn0000117, FBgn0003165, FBgn0003310, FBgn0000137, FBgn0004647, FBgn0259791, FBgn0010300, FBgn0250789, FBgn0002522, FBgn0016917, FBgn0085432, FBgn0002121, FBgn0010382, FBgn0040080, FBgn0015790, FBgn0003053, FBgn0011666, FBgn0004872, FBgn0015754, FBgn0001624, FBgn0001085, FBgn0015014, FBgn0003300, FBgn0003507, FBgn0028734, FBgn00137…	0.201097
GO:0035265	organ growth	11	0.0247049	FBgn0000179, FBgn0004644, FBgn0032475, FBgn0041191, FBgn0015907, FBgn0003659, FBgn0002413, FBgn0015544, FBgn0001075, FBgn0004647, FBgn0003612	0.203744
GO:0008380	RNA splicing	46	0.0249124	FBgn0033842, FBgn0017457, FBgn0040235, FBgn0031493, FBgn0002736, FBgn0031492, FBgn0005649, FBgn0036733, FBgn0036734, FBgn0039977, FBgn0035692, FBgn0039566, FBgn0052533, FBgn0014189, FBgn0011224, FBgn0030551, FBgn0086707, FBgn0086895, FBgn0031628, FBgn0038344, FBgn0027784, FBgn0031607, FBgn0038927, FBgn0036314, FBgn0035136, FBgn0033378, FBgn0035253, FBgn0016978, FBgn0035838, FBgn0051812, FBgn00285…	0.204755
GO:0009913	epidermal cell differentiation	15	0.0250171	FBgn0041203, FBgn0000317, FBgn0005634, FBgn0001085, FBgn0003447, FBgn0001075, FBgn0003514, FBgn0000497, FBgn0024273, FBgn0016081, FBgn0026181, FBgn0002413, FBgn0010341, FBgn0005536, FBgn0001987	0.205001
GO:0016485	protein processing	15	0.0250171	FBgn0003310, FBgn0002926, FBgn0038271, FBgn0004644, FBgn0020381, FBgn0019947, FBgn0003450, FBgn0042641, FBgn0034535, FBgn0028985, FBgn0012051, FBgn0033656, FBgn0033052, FBgn0023179, FBgn0030669	0.205001
GO:0051188	cofactor biosynthetic process	22	0.0250365	FBgn0032922, FBgn0030882, FBgn0035632, FBgn0029502, FBgn0020018, FBgn0036271, FBgn0000316, FBgn0031589, FBgn0030407, FBgn0033972, FBgn0032054, FBgn0039156, FBgn0030460, FBgn0020236, FBgn0010222, FBgn0033428, FBgn0037942, FBgn0037637, FBgn0039993, FBgn0021944, FBgn0031912, FBgn0023536	0.204615
GO:0003002	regionalization	124	0.0254398	FBgn0041604, FBgn0004567, FBgn0003165, FBgn0020224, FBgn0000139, FBgn0001079, FBgn0260003, FBgn0041161, FBgn0010300, FBgn0042641, FBgn0010303, FBgn0003371, FBgn0031005, FBgn0001168, FBgn0033378, FBgn0000146, FBgn0002926, FBgn0000439, FBgn0005410, FBgn0014388, FBgn0003944, FBgn0015925, FBgn0259240, FBgn0000242, FBgn0086655, FBgn0001169, FBgn0000256, FBgn0027594, FBgn0000395, FBgn0000117, FBgn00031…	0.20705
GO:0007052	mitotic spindle organization	58	0.0256347	FBgn0002914, FBgn0015664, FBgn0031696, FBgn0040235, FBgn0031452, FBgn0040232, FBgn0032987, FBgn0035692, FBgn0039731, FBgn0021825, FBgn0030067, FBgn0028662, FBgn0040273, FBgn0039206, FBgn0015391, FBgn0027783, FBgn0033718, FBgn0036314, FBgn0014127, FBgn0003884, FBgn0024227, FBgn0037249, FBgn0002924, FBgn0028695, FBgn0028693, FBgn0086134, FBgn0039626, FBgn0017457, FBgn0031980, FBgn0030500, FBgn00264…	0.207945
GO:0006720	isoprenoid metabolic process	10	0.0256426	FBgn0002937, FBgn0019662, FBgn0034405, FBgn0025697, FBgn0037044, FBgn0030683, FBgn0061360, FBgn0051005, FBgn0028841, FBgn0001205	0.207473
GO:0030178	negative regulation of Wnt receptor signaling pathway	10	0.0256426	FBgn0026597, FBgn0020309, FBgn0086356, FBgn0001139, FBgn0039110, FBgn0016917, FBgn0085432, FBgn0001075, FBgn0023423, FBgn0003371	0.207473
GO:0008299	isoprenoid biosynthetic process	8	0.0256932	FBgn0002937, FBgn0019662, FBgn0037044, FBgn0030683, FBgn0061360, FBgn0051005, FBgn0028841, FBgn0001205	0.207314
GO:0033261	regulation of S phase	8	0.0256932	FBgn0004837, FBgn0011648, FBgn0015799, FBgn0032698, FBgn0001965, FBgn0039403, FBgn0004647, FBgn0035194	0.207314
GO:0032984	macromolecular complex disassembly	9	0.0260881	FBgn0002542, FBgn0031868, FBgn0032261, FBgn0039213, FBgn0036974, FBgn0038206, FBgn0037218, FBgn0004179, FBgn0020443	0.209646
GO:0034623	cellular macromolecular complex disassembly	9	0.0260881	FBgn0002542, FBgn0031868, FBgn0032261, FBgn0039213, FBgn0036974, FBgn0038206, FBgn0037218, FBgn0004179, FBgn0020443	0.209646
GO:0035317	imaginal disc-derived wing hair organization	14	0.0271144	FBgn0041203, FBgn0000317, FBgn0005634, FBgn0001085, FBgn0003447, FBgn0001075, FBgn0003514, FBgn0000497, FBgn0016081, FBgn0026181, FBgn0002413, FBgn0010341, FBgn0005536, FBgn0001987	0.216484
GO:0048634	regulation of muscle development	14	0.0271144	FBgn0011648, FBgn0002791, FBgn0259108, FBgn0035060, FBgn0003165, FBgn0028734, FBgn0024273, FBgn0000014, FBgn0003944, FBgn0003317, FBgn0250789, FBgn0250788, FBgn0086676, FBgn0030600	0.216484
GO:0080135	regulation of cellular response to stress	14	0.0271144	FBgn0003053, FBgn0028546, FBgn0044323, FBgn0259212, FBgn0015286, FBgn0000117, FBgn0004647, FBgn0040281, FBgn0010303, FBgn0041100, FBgn0029798, FBgn0039338, FBgn0024326, FBgn0086378	0.216484
GO:0007450	dorsal/ventral pattern formation, imaginal disc	21	0.0275668	FBgn0041604, FBgn0003053, FBgn0037700, FBgn0037021, FBgn0027594, FBgn0011591, FBgn0004647, FBgn0005410, FBgn0004837, FBgn0004197, FBgn0019947, FBgn0034071, FBgn0014037, FBgn0043364, FBgn0015816, FBgn0000083, FBgn0000099, FBgn0001169, FBgn0040071, FBgn0031005, FBgn0003118	0.219162
GO:0042127	regulation of cell proliferation	21	0.0275668	FBgn0086384, FBgn0004583, FBgn0011676, FBgn0001624, FBgn0010389, FBgn0028397, FBgn0040078, FBgn0005198, FBgn0045823, FBgn0004647, FBgn0004595, FBgn0004644, FBgn0020306, FBgn0010300, FBgn0026317, FBgn0015799, FBgn0032698, FBgn0002121, FBgn0053193, FBgn0010382, FBgn0038197	0.219162
GO:0048858	cell projection morphogenesis	90	0.0280938	FBgn0041604, FBgn0250876, FBgn0001139, FBgn0003165, FBgn0014163, FBgn0003435, FBgn0002526, FBgn0085436, FBgn0011771, FBgn0034452, FBgn0000479, FBgn0010303, FBgn0010341, FBgn0010280, FBgn0030330, FBgn0000173, FBgn0010238, FBgn0040324, FBgn0027053, FBgn0031829, FBgn0259108, FBgn0000629, FBgn0261268, FBgn0013717, FBgn0015014, FBgn0035754, FBgn0029094, FBgn0029157, FBgn0004595, FBgn0000723, FBgn00101…	0.222346
GO:0045596	negative regulation of cell differentiation	26	0.0285911	FBgn0028582, FBgn0001981, FBgn0011207, FBgn0000117, FBgn0004647, FBgn0038947, FBgn0010300, FBgn0003317, FBgn0016917, FBgn0002121, FBgn0031005, FBgn0000320, FBgn0004872, FBgn0011648, FBgn0011666, FBgn0016700, FBgn0021760, FBgn0028734, FBgn0003507, FBgn0004595, FBgn0004837, FBgn0004197, FBgn0014388, FBgn0021764, FBgn0000097, FBgn0003118	0.225292
GO:0045175	basal protein localization	5	0.0287175	FBgn0011674, FBgn0001624, FBgn0002121, FBgn0000163, FBgn0040080	0.225621
GO:0007291	sperm individualization	13	0.0293036	FBgn0026619, FBgn0027538, FBgn0011823, FBgn0261397, FBgn0021814, FBgn0011241, FBgn0003654, FBgn0020381, FBgn0024252, FBgn0011230, FBgn0011232, FBgn0038928, FBgn0000546	0.229148
GO:0010769	regulation of cell morphogenesis involved in differentiation	13	0.0293036	FBgn0041203, FBgn0016700, FBgn0028734, FBgn0013733, FBgn0024277, FBgn0029157, FBgn0038947, FBgn0016081, FBgn0026181, FBgn0010341, FBgn0014001, FBgn0053193, FBgn0023172	0.229148
GO:0010975	regulation of neuron projection development	13	0.0293036	FBgn0041203, FBgn0016700, FBgn0028734, FBgn0013733, FBgn0024277, FBgn0029157, FBgn0038947, FBgn0016081, FBgn0026181, FBgn0010341, FBgn0014001, FBgn0053193, FBgn0023172	0.229148
GO:0008033	tRNA processing	18	0.0301388	FBgn0036000, FBgn0033842, FBgn0043799, FBgn0051812, FBgn0083992, FBgn0038576, FBgn0036266, FBgn0035831, FBgn0030554, FBgn0037708, FBgn0032054, FBgn0031238, FBgn0026079, FBgn0083976, FBgn0052281, FBgn0034735, FBgn0031321, FBgn0003062, FBgn0034703	0.23436
GO:0006650	glycerophospholipid metabolic process	20	0.030365	FBgn0035265, FBgn0037743, FBgn0026619, FBgn0030035, FBgn0037010, FBgn0086448, FBgn0028741, FBgn0039924, FBgn0034789, FBgn0037339, FBgn0030465, FBgn0015278, FBgn0015277, FBgn0003218, FBgn0029789, FBgn0035435, FBgn0004373, FBgn0010350, FBgn0000536, FBgn0034270	0.235344
GO:0016079	synaptic vesicle exocytosis	20	0.030365	FBgn0053653, FBgn0004574, FBgn0031454, FBgn0013759, FBgn0004242, FBgn0000346, FBgn0011288, FBgn0033876, FBgn0031537, FBgn0040285, FBgn0013343, FBgn0027103, FBgn0013997, FBgn0039774, FBgn0002121, FBgn0004179, FBgn0031450, FBgn0016975, FBgn0053547, FBgn0030230	0.235344
GO:0046578	regulation of Ras protein signal transduction	27	0.0303915	FBgn0033349, FBgn0038401, FBgn0035073, FBgn0024277, FBgn0038304, FBgn0039158, FBgn0050115, FBgn0027932, FBgn0040005, FBgn0026170, FBgn0051158, FBgn0001965, FBgn0026179, FBgn0033714, FBgn0050372, FBgn0053519, FBgn0086361, FBgn0014388, FBgn0031304, FBgn0086906, FBgn0025836, FBgn0037917, FBgn0000097, FBgn0023172, FBgn0015803, FBgn0086779, FBgn0261261	0.234956
GO:0051254	positive regulation of RNA metabolic process	30	0.0306615	FBgn0003687, FBgn0010520, FBgn0001981, FBgn0001276, FBgn0000117, FBgn0011836, FBgn0004647, FBgn0000139, FBgn0034650, FBgn0040273, FBgn0038046, FBgn0013799, FBgn0010280, FBgn0042085, FBgn0028974, FBgn0005630, FBgn0013753, FBgn0038578, FBgn0010356, FBgn0013717, FBgn0014018, FBgn0015014, FBgn0003507, FBgn0005410, FBgn0013948, FBgn0004837, FBgn0030093, FBgn0015904, FBgn0040071, FBgn0000212	0.236231
GO:0019220	regulation of phosphate metabolic process	25	0.0315262	FBgn0030208, FBgn0028546, FBgn0020224, FBgn0259791, FBgn0026192, FBgn0052484, FBgn0026170, FBgn0033935, FBgn0010341, FBgn0010303, FBgn0001297, FBgn0010382, FBgn0028429, FBgn0004638, FBgn0026323, FBgn0026402, FBgn0086361, FBgn0016081, FBgn0259243, FBgn0026181, FBgn0037816, FBgn0010909, FBgn0052179, FBgn0024326, FBgn0050291	0.241526
GO:0044093	positive regulation of molecular function	25	0.0315262	FBgn0000351, FBgn0024944, FBgn0259791, FBgn0001079, FBgn0004644, FBgn0024252, FBgn0052484, FBgn0026170, FBgn0010341, FBgn0010303, FBgn0004435, FBgn0035136, FBgn0029113, FBgn0026323, FBgn0004638, FBgn0005198, FBgn0011704, FBgn0013948, FBgn0016081, FBgn0010909, FBgn0052179, FBgn0041585, FBgn0001123, FBgn0045073, FBgn0024326	0.241526
GO:0051174	regulation of phosphorus metabolic process	25	0.0315262	FBgn0030208, FBgn0028546, FBgn0020224, FBgn0259791, FBgn0026192, FBgn0052484, FBgn0026170, FBgn0033935, FBgn0010341, FBgn0010303, FBgn0001297, FBgn0010382, FBgn0028429, FBgn0004638, FBgn0026323, FBgn0026402, FBgn0086361, FBgn0016081, FBgn0259243, FBgn0026181, FBgn0037816, FBgn0010909, FBgn0052179, FBgn0024326, FBgn0050291	0.241526
GO:0043297	apical junction assembly	12	0.0315454	FBgn0013997, FBgn0026192, FBgn0001624, FBgn0002921, FBgn0004167, FBgn0002121, FBgn0000117, FBgn0067864, FBgn0010894, FBgn0000163, FBgn0001987, FBgn0020278	0.241078
GO:0051604	protein maturation	15	0.0318954	FBgn0003310, FBgn0002926, FBgn0038271, FBgn0004644, FBgn0020381, FBgn0019947, FBgn0003450, FBgn0042641, FBgn0034535, FBgn0028985, FBgn0012051, FBgn0033656, FBgn0033052, FBgn0023179, FBgn0030669	0.242855
GO:0030707	ovarian follicle cell development	60	0.0319099	FBgn0002914, FBgn0033846, FBgn0003475, FBgn0020224, FBgn0000307, FBgn0026192, FBgn0016917, FBgn0010303, FBgn0010341, FBgn0010382, FBgn0031450, FBgn0003371, FBgn0000382, FBgn0000146, FBgn0000482, FBgn0002926, FBgn0011763, FBgn0014388, FBgn0004650, FBgn0000180, FBgn0026238, FBgn0000182, FBgn0086655, FBgn0000996, FBgn0000256, FBgn0000221, FBgn0000117, FBgn0015477, FBgn0003514, FBgn0004647, FBgn00046…	0.242375
GO:0006355	regulation of transcription, DNA-dependent	162	0.0323965	FBgn0002914, FBgn0029504, FBgn0013746, FBgn0004567, FBgn0033846, FBgn0038872, FBgn0001276, FBgn0052532, FBgn0034012, FBgn0003165, FBgn0011836, FBgn0000137, FBgn0000448, FBgn0000139, FBgn0042696, FBgn0024491, FBgn0038046, FBgn0002525, FBgn0032223, FBgn0037445, FBgn0002522, FBgn0010303, FBgn0042085, FBgn0010280, FBgn0003371, FBgn0001168, FBgn0035954, FBgn0000629, FBgn0013753, FBgn0038578, FBgn00140…	0.245047
GO:0051093	negative regulation of developmental process	32	0.0334949	FBgn0004583, FBgn0028582, FBgn0001981, FBgn0011207, FBgn0000117, FBgn0001075, FBgn0004647, FBgn0024273, FBgn0038947, FBgn0010300, FBgn0003317, FBgn0016917, FBgn0004435, FBgn0002121, FBgn0030600, FBgn0031005, FBgn0000320, FBgn0004872, FBgn0002791, FBgn0011648, FBgn0011666, FBgn0016700, FBgn0021760, FBgn0003507, FBgn0028734, FBgn0004595, FBgn0004837, FBgn0004197, FBgn0014388, FBgn0021764, FBgn00000…	0.251738
GO:0000075	cell cycle checkpoint	11	0.0337721	FBgn0031696, FBgn0000063, FBgn0003268, FBgn0015754, FBgn0004643, FBgn0035640, FBgn0020270, FBgn0032698, FBgn0061476, FBgn0003884, FBgn0000996	0.252969
GO:0030855	epithelial cell differentiation	11	0.0337721	FBgn0003053, FBgn0013997, FBgn0039014, FBgn0005634, FBgn0035085, FBgn0001085, FBgn0001075, FBgn0010894, FBgn0001987, FBgn0020278, FBgn0000497	0.252969
GO:0012502	induction of programmed cell death	14	0.0348425	FBgn0000210, FBgn0037770, FBgn0005634, FBgn0000439, FBgn0027609, FBgn0013948, FBgn0000568, FBgn0024252, FBgn0039338, FBgn0000097, FBgn0002121, FBgn0053193, FBgn0010382, FBgn0000546	0.259362
GO:0035315	hair cell differentiation	14	0.0348425	FBgn0041203, FBgn0000317, FBgn0005634, FBgn0001085, FBgn0003447, FBgn0001075, FBgn0003514, FBgn0000497, FBgn0016081, FBgn0026181, FBgn0002413, FBgn0010341, FBgn0005536, FBgn0001987	0.259362
GO:0035316	non-sensory hair organization	14	0.0348425	FBgn0041203, FBgn0000317, FBgn0005634, FBgn0001085, FBgn0003447, FBgn0001075, FBgn0003514, FBgn0000497, FBgn0016081, FBgn0026181, FBgn0002413, FBgn0010341, FBgn0005536, FBgn0001987	0.259362
GO:0000910	cytokinesis	27	0.0353984	FBgn0002914, FBgn0026433, FBgn0024689, FBgn0000405, FBgn0014029, FBgn0031537, FBgn0003514, FBgn0013343, FBgn0013726, FBgn0011692, FBgn0086356, FBgn0259876, FBgn0031090, FBgn0004167, FBgn0011710, FBgn0004373, FBgn0026479, FBgn0004379, FBgn0004574, FBgn0024227, FBgn0028968, FBgn0005634, FBgn0037473, FBgn0026181, FBgn0011606, FBgn0013750, FBgn0000163	0.262357
GO:0048610	reproductive cellular process	134	0.0354306	FBgn0002914, FBgn0010389, FBgn0033846, FBgn0027538, FBgn0003165, FBgn0020224, FBgn0011224, FBgn0026206, FBgn0029088, FBgn0041161, FBgn0010303, FBgn0010382, FBgn0003371, FBgn0033378, FBgn0011823, FBgn0000146, FBgn0002926, FBgn0003654, FBgn0011723, FBgn0014388, FBgn0015925, FBgn0259243, FBgn0011230, FBgn0003659, FBgn0011232, FBgn0046687, FBgn0023172, FBgn0086655, FBgn0000256, FBgn0004606, FBgn00112…	0.261959
GO:0005977	glycogen metabolic process	6	0.0359725	FBgn0011754, FBgn0034618, FBgn0031995, FBgn0038293, FBgn0038197, FBgn0030087	0.264834
GO:0006073	cellular glucan metabolic process	6	0.0359725	FBgn0011754, FBgn0034618, FBgn0031995, FBgn0038293, FBgn0038197, FBgn0030087	0.264834
GO:0006112	energy reserve metabolic process	6	0.0359725	FBgn0011754, FBgn0034618, FBgn0031995, FBgn0038293, FBgn0038197, FBgn0030087	0.264834
GO:0035072	ecdysone-mediated induction of salivary gland cell autophagic cell death	6	0.0359725	FBgn0013948, FBgn0000210, FBgn0000568, FBgn0005634, FBgn0002121, FBgn0000546	0.264834
GO:0044042	glucan metabolic process	6	0.0359725	FBgn0011754, FBgn0034618, FBgn0031995, FBgn0038293, FBgn0038197, FBgn0030087	0.264834
GO:0046112	nucleobase biosynthetic process	6	0.0359725	FBgn0000109, FBgn0086450, FBgn0000447, FBgn0004901, FBgn0003189, FBgn0003257	0.264834
GO:0051046	regulation of secretion	6	0.0359725	FBgn0053653, FBgn0010391, FBgn0260003, FBgn0002413, FBgn0033876, FBgn0053547	0.264834
GO:0007051	spindle organization	65	0.0366223	FBgn0031696, FBgn0002914, FBgn0015664, FBgn0024689, FBgn0040235, FBgn0031452, FBgn0040232, FBgn0032987, FBgn0035692, FBgn0039731, FBgn0021825, FBgn0030067, FBgn0028662, FBgn0040273, FBgn0027783, FBgn0039206, FBgn0015391, FBgn0033718, FBgn0036314, FBgn0014127, FBgn0003884, FBgn0024227, FBgn0037249, FBgn0002924, FBgn0028695, FBgn0013756, FBgn0028693, FBgn0086134, FBgn0003654, FBgn0039626, FBgn00174…	0.268371
GO:0008544	epidermis development	18	0.03689	FBgn0041203, FBgn0000317, FBgn0005634, FBgn0027620, FBgn0001085, FBgn0003447, FBgn0001075, FBgn0003514, FBgn0000497, FBgn0024273, FBgn0004644, FBgn0016081, FBgn0026181, FBgn0002413, FBgn0010341, FBgn0005536, FBgn0001987, FBgn0000546	0.269457
GO:0016049	cell growth	18	0.03689	FBgn0024913, FBgn0002774, FBgn0259212, FBgn0039532, FBgn0001085, FBgn0040230, FBgn0033159, FBgn0011787, FBgn0010315, FBgn0011204, FBgn0086706, FBgn0000723, FBgn0041191, FBgn0003380, FBgn0011771, FBgn0011230, FBgn0000479, FBgn0010303	0.269457
GO:0007409	axonogenesis	58	0.0375165	FBgn0041604, FBgn0250876, FBgn0014163, FBgn0003435, FBgn0002526, FBgn0011771, FBgn0000479, FBgn0010341, FBgn0010303, FBgn0000173, FBgn0010238, FBgn0027053, FBgn0040324, FBgn0259108, FBgn0000629, FBgn0261268, FBgn0013717, FBgn0029157, FBgn0004595, FBgn0000723, FBgn0004795, FBgn0016061, FBgn0025936, FBgn0086655, FBgn0010391, FBgn0086680, FBgn0004606, FBgn0001250, FBgn0020388, FBgn0033159, FBgn00242…	0.272798
GO:0051052	regulation of DNA metabolic process	9	0.0376367	FBgn0004872, FBgn0011676, FBgn0015799, FBgn0032698, FBgn0029798, FBgn0000307, FBgn0033081, FBgn0010382, FBgn0000996	0.272937
GO:0006633	fatty acid biosynthetic process	13	0.0380092	FBgn0051522, FBgn0001941, FBgn0033883, FBgn0039754, FBgn0032603, FBgn0034145, FBgn0036691, FBgn0037534, FBgn0034142, FBgn0040001, FBgn0086687, FBgn0029969, FBgn0030485	0.274652
GO:0030111	regulation of Wnt receptor signaling pathway	13	0.0380092	FBgn0026597, FBgn0001139, FBgn0039110, FBgn0015024, FBgn0040078, FBgn0001075, FBgn0039907, FBgn0086356, FBgn0020309, FBgn0016917, FBgn0085432, FBgn0023423, FBgn0003371	0.274652
GO:0042440	pigment metabolic process	23	0.0383941	FBgn0000257, FBgn0003210, FBgn0025697, FBgn0020018, FBgn0000247, FBgn0001087, FBgn0002567, FBgn0002566, FBgn0000482, FBgn0003515, FBgn0028990, FBgn0003499, FBgn0002937, FBgn0003008, FBgn0033428, FBgn0000109, FBgn0004034, FBgn0086679, FBgn0000527, FBgn0000330, FBgn0021944, FBgn0004901, FBgn0023536	0.276433
GO:0007435	salivary gland morphogenesis	36	0.0384482	FBgn0028360, FBgn0015239, FBgn0027932, FBgn0024252, FBgn0085432, FBgn0037270, FBgn0002121, FBgn0000320, FBgn0001168, FBgn0025697, FBgn0000210, FBgn0010435, FBgn0037700, FBgn0005634, FBgn0039532, FBgn0001085, FBgn0004396, FBgn0035107, FBgn0003507, FBgn0015795, FBgn0003502, FBgn0087035, FBgn0013948, FBgn0004197, FBgn0004795, FBgn0000568, FBgn0010709, FBgn0036974, FBgn0035049, FBgn0000565, FBgn00433…	0.276151
GO:0022612	gland morphogenesis	36	0.0384482	FBgn0028360, FBgn0015239, FBgn0027932, FBgn0024252, FBgn0085432, FBgn0037270, FBgn0002121, FBgn0000320, FBgn0001168, FBgn0025697, FBgn0000210, FBgn0010435, FBgn0037700, FBgn0005634, FBgn0039532, FBgn0001085, FBgn0004396, FBgn0035107, FBgn0003507, FBgn0015795, FBgn0003502, FBgn0087035, FBgn0013948, FBgn0004197, FBgn0004795, FBgn0000568, FBgn0010709, FBgn0036974, FBgn0035049, FBgn0000565, FBgn00433…	0.276151
GO:0006584	catecholamine metabolic process	7	0.0385622	FBgn0019948, FBgn0036565, FBgn0010329, FBgn0000422, FBgn0005619, FBgn0000527, FBgn0005626	0.276241
GO:0009712	catechol metabolic process	7	0.0385622	FBgn0019948, FBgn0036565, FBgn0010329, FBgn0000422, FBgn0005619, FBgn0000527, FBgn0005626	0.276241
GO:0018958	phenol metabolic process	7	0.0385622	FBgn0019948, FBgn0036565, FBgn0010329, FBgn0000422, FBgn0005619, FBgn0000527, FBgn0005626	0.276241
GO:0033013	tetrapyrrole metabolic process	7	0.0385622	FBgn0033428, FBgn0010786, FBgn0036271, FBgn0020018, FBgn0021944, FBgn0030066, FBgn0023536	0.276241
GO:0034311	diol metabolic process	7	0.0385622	FBgn0019948, FBgn0036565, FBgn0010329, FBgn0000422, FBgn0005619, FBgn0000527, FBgn0005626	0.276241
GO:0050821	protein stabilization	7	0.0385622	FBgn0027057, FBgn0027055, FBgn0013746, FBgn0028836, FBgn0042085, FBgn0028837, FBgn0027053	0.276241
GO:0016573	histone acetylation	8	0.0387375	FBgn0020306, FBgn0040078, FBgn0020388, FBgn0027378, FBgn0031759, FBgn0031873, FBgn0039067, FBgn0014340	0.276708
GO:0031644	regulation of neurological system process	8	0.0387375	FBgn0260003, FBgn0002791, FBgn0003380, FBgn0039141, FBgn0250789, FBgn0259246, FBgn0003165, FBgn0250788	0.276708
GO:0050804	regulation of synaptic transmission	8	0.0387375	FBgn0260003, FBgn0002791, FBgn0003380, FBgn0039141, FBgn0250789, FBgn0259246, FBgn0003165, FBgn0250788	0.276708
GO:0051969	regulation of transmission of nerve impulse	8	0.0387375	FBgn0260003, FBgn0002791, FBgn0003380, FBgn0039141, FBgn0250789, FBgn0259246, FBgn0003165, FBgn0250788	0.276708
GO:0008354	germ cell migration	15	0.0400488	FBgn0019662, FBgn0004606, FBgn0010389, FBgn0003165, FBgn0051641, FBgn0003507, FBgn0029088, FBgn0004644, FBgn0011723, FBgn0000014, FBgn0020245, FBgn0001205, FBgn0004512, FBgn0046687, FBgn0000320	0.284131
GO:0031344	regulation of cell projection organization	15	0.0400488	FBgn0041203, FBgn0003721, FBgn0016700, FBgn0028734, FBgn0013733, FBgn0024277, FBgn0029157, FBgn0038947, FBgn0016081, FBgn0026181, FBgn0010341, FBgn0038206, FBgn0014001, FBgn0053193, FBgn0023172	0.284131
GO:0048646	anatomical structure formation involved in morphogenesis	101	0.040507	FBgn0002914, FBgn0010389, FBgn0027538, FBgn0033846, FBgn0014029, FBgn0001075, FBgn0013343, FBgn0001079, FBgn0010303, FBgn0010382, FBgn0243516, FBgn0011823, FBgn0000146, FBgn0002926, FBgn0003654, FBgn0011723, FBgn0041174, FBgn0003944, FBgn0011230, FBgn0011232, FBgn0013750, FBgn0023172, FBgn0001169, FBgn0000256, FBgn0001250, FBgn0000117, FBgn0261397, FBgn0000114, FBgn0020381, FBgn0011758, FBgn00053…	0.286291
GO:0010942	positive regulation of cell death	17	0.0406893	FBgn0000210, FBgn0037770, FBgn0005634, FBgn0013726, FBgn0000439, FBgn0011763, FBgn0013948, FBgn0027609, FBgn0000568, FBgn0024252, FBgn0000097, FBgn0039338, FBgn0011710, FBgn0002121, FBgn0053193, FBgn0010382, FBgn0000546	0.286767
GO:0043068	positive regulation of programmed cell death	17	0.0406893	FBgn0000210, FBgn0037770, FBgn0005634, FBgn0013726, FBgn0000439, FBgn0011763, FBgn0013948, FBgn0027609, FBgn0000568, FBgn0024252, FBgn0000097, FBgn0039338, FBgn0011710, FBgn0002121, FBgn0053193, FBgn0010382, FBgn0000546	0.286767
GO:0006207	'de novo' pyrimidine base biosynthetic process	4	0.0410861	FBgn0086450, FBgn0000447, FBgn0003189, FBgn0003257	0.288534
GO:0016336	establishment or maintenance of polarity of larval imaginal disc epithelium	4	0.0410861	FBgn0028992, FBgn0001624, FBgn0002121, FBgn0011661	0.288534
GO:0018195	peptidyl-arginine modification	4	0.0410861	FBgn0037770, FBgn0015925, FBgn0034817, FBgn0037834	0.288534
GO:0018216	peptidyl-arginine methylation	4	0.0410861	FBgn0037770, FBgn0015925, FBgn0034817, FBgn0037834	0.288534
GO:0019856	pyrimidine base biosynthetic process	4	0.0410861	FBgn0086450, FBgn0000447, FBgn0003189, FBgn0003257	0.288534
GO:0034453	microtubule anchoring	4	0.0410861	FBgn0024227, FBgn0000405, FBgn0021760, FBgn0004379	0.288534
GO:0051313	attachment of spindle microtubules to chromosome	4	0.0410861	FBgn0024227, FBgn0000405, FBgn0021760, FBgn0004379	0.288534
GO:0001745	compound eye morphogenesis	71	0.041303	FBgn0000179, FBgn0001075, FBgn0033179, FBgn0043884, FBgn0002525, FBgn0042641, FBgn0002413, FBgn0037218, FBgn0023444, FBgn0027053, FBgn0031005, FBgn0000382, FBgn0001168, FBgn0086384, FBgn0044323, FBgn0261268, FBgn0023489, FBgn0026323, FBgn0004595, FBgn0005410, FBgn0014388, FBgn0015778, FBgn0037657, FBgn0053193, FBgn0005619, FBgn0011661, FBgn0004583, FBgn0011207, FBgn0000117, FBgn0261397, FBgn00033…	0.289208
GO:0042078	germ-line stem cell division	12	0.0413819	FBgn0004644, FBgn0051232, FBgn0004872, FBgn0011666, FBgn0011648, FBgn0003317, FBgn0039016, FBgn0016917, FBgn0011207, FBgn0003165, FBgn0000117, FBgn0000114	0.289054
GO:0010608	posttranscriptional regulation of gene expression	39	0.0415922	FBgn0038808, FBgn0013746, FBgn0038234, FBgn0003165, FBgn0011837, FBgn0000114, FBgn0032515, FBgn0001079, FBgn0027057, FBgn0016070, FBgn0010300, FBgn0027055, FBgn0042085, FBgn0027053, FBgn0004872, FBgn0015754, FBgn0011666, FBgn0037249, FBgn0026722, FBgn0038100, FBgn0027835, FBgn0036462, FBgn0028734, FBgn0000146, FBgn0022942, FBgn0036534, FBgn0039260, FBgn0019990, FBgn0087035, FBgn0024183, FBgn00373…	0.289684
GO:0043067	regulation of programmed cell death	35	0.0421689	FBgn0024732, FBgn0036237, FBgn0020386, FBgn0013726, FBgn0086706, FBgn0029891, FBgn0027609, FBgn0027885, FBgn0024252, FBgn0002413, FBgn0004435, FBgn0011710, FBgn0002121, FBgn0035136, FBgn0010382, FBgn0023423, FBgn0086384, FBgn0000210, FBgn0259108, FBgn0259784, FBgn0026252, FBgn0037770, FBgn0005634, FBgn0000439, FBgn0011763, FBgn0013948, FBgn0011704, FBgn0000568, FBgn0015247, FBgn0000097, FBgn00393…	0.292487
GO:0009101	glycoprotein biosynthetic process	22	0.0424095	FBgn0037743, FBgn0000221, FBgn0011336, FBgn0029906, FBgn0053145, FBgn0033315, FBgn0051849, FBgn0038755, FBgn0011591, FBgn0014868, FBgn0066114, FBgn0035558, FBgn0020245, FBgn0034081, FBgn0030662, FBgn0030327, FBgn0034277, FBgn0015360, FBgn0052076, FBgn0040373, FBgn0003292, FBgn0034521	0.293283
GO:0022904	respiratory electron transport chain	25	0.043068	FBgn0250814, FBgn0035600, FBgn0031436, FBgn0032511, FBgn0030853, FBgn0047038, FBgn0033961, FBgn0038271, FBgn0052649, FBgn0022160, FBgn0031505, FBgn0037873, FBgn0001989, FBgn0013684, FBgn0035046, FBgn0040705, FBgn0017567, FBgn0039689, FBgn0031228, FBgn0029868, FBgn0021906, FBgn0037097, FBgn0025839, FBgn0011455, FBgn0030718	0.296532
GO:0006457	protein folding	36	0.0433409	FBgn0031399, FBgn0028382, FBgn0038976, FBgn0030990, FBgn0036334, FBgn0058178, FBgn0025615, FBgn0039562, FBgn0023529, FBgn0034109, FBgn0033342, FBgn0037544, FBgn0036020, FBgn0039347, FBgn0030086, FBgn0026418, FBgn0003676, FBgn0033663, FBgn0036918, FBgn0038145, FBgn0037632, FBgn0035027, FBgn0001220, FBgn0034753, FBgn0002174, FBgn0036505, FBgn0033089, FBgn0014877, FBgn0035025, FBgn0010470, FBgn00296…	0.2975
GO:0016051	carbohydrate biosynthetic process	20	0.0437593	FBgn0031697, FBgn0034618, FBgn0001970, FBgn0037743, FBgn0051915, FBgn0029906, FBgn0033315, FBgn0027560, FBgn0038293, FBgn0032618, FBgn0035375, FBgn0011754, FBgn0033087, FBgn0003067, FBgn0020245, FBgn0030662, FBgn0034081, FBgn0015360, FBgn0034794, FBgn0025885	0.299309
GO:0060562	epithelial tube morphogenesis	16	0.0449024	FBgn0000382, FBgn0014135, FBgn0004101, FBgn0001981, FBgn0000117, FBgn0038755, FBgn0031537, FBgn0013733, FBgn0026207, FBgn0014388, FBgn0002525, FBgn0003079, FBgn0037917, FBgn0010350, FBgn0010452, FBgn0003118	0.305296
GO:0016318	ommatidial rotation	11	0.0449254	FBgn0003053, FBgn0014388, FBgn0026252, FBgn0015778, FBgn0259212, FBgn0026181, FBgn0001085, FBgn0026323, FBgn0052179, FBgn0001075, FBgn0000497	0.304787
GO:0042398	cellular amino acid derivative biosynthetic process	11	0.0449254	FBgn0030882, FBgn0010329, FBgn0000422, FBgn0036272, FBgn0005619, FBgn0030407, FBgn0019932, FBgn0005626, FBgn0005278, FBgn0000536, FBgn0000303	0.304787
GO:0042775	mitochondrial ATP synthesis coupled electron transport	23	0.0450567	FBgn0250814, FBgn0035600, FBgn0031436, FBgn0032511, FBgn0035046, FBgn0030853, FBgn0047038, FBgn0017567, FBgn0033961, FBgn0040705, FBgn0038271, FBgn0039689, FBgn0031228, FBgn0052649, FBgn0029868, FBgn0021906, FBgn0037097, FBgn0031505, FBgn0025839, FBgn0037873, FBgn0011455, FBgn0001989, FBgn0030718	0.304903
GO:0006066	alcohol metabolic process	51	0.0458359	FBgn0034618, FBgn0027538, FBgn0066101, FBgn0025640, FBgn0038293, FBgn0000303, FBgn0016672, FBgn0022160, FBgn0035392, FBgn0024320, FBgn0039827, FBgn0011768, FBgn0002569, FBgn0034491, FBgn0036262, FBgn0003178, FBgn0050410, FBgn0000527, FBgn0005619, FBgn0025592, FBgn0028325, FBgn0000064, FBgn0023477, FBgn0035266, FBgn0000422, FBgn0010329, FBgn0027621, FBgn0010328, FBgn0011754, FBgn0019948, FBgn00365…	0.30872
GO:0042773	ATP synthesis coupled electron transport	24	0.0475447	FBgn0250814, FBgn0035600, FBgn0031436, FBgn0013684, FBgn0032511, FBgn0035046, FBgn0030853, FBgn0047038, FBgn0017567, FBgn0033961, FBgn0040705, FBgn0038271, FBgn0039689, FBgn0031228, FBgn0052649, FBgn0029868, FBgn0021906, FBgn0037097, FBgn0031505, FBgn0025839, FBgn0037873, FBgn0011455, FBgn0001989, FBgn0030718	0.317746
GO:0001558	regulation of cell growth	13	0.0483837	FBgn0086384, FBgn0038100, FBgn0005198, FBgn0020386, FBgn0013733, FBgn0010315, FBgn0041191, FBgn0037647, FBgn0021796, FBgn0026317, FBgn0002413, FBgn0015806, FBgn0038197	0.321788
GO:0046328	regulation of JNK cascade	13	0.0483837	FBgn0003053, FBgn0028546, FBgn0044323, FBgn0259212, FBgn0015286, FBgn0000117, FBgn0004647, FBgn0040281, FBgn0010303, FBgn0039338, FBgn0041100, FBgn0024326, FBgn0086378	0.321788
GO:0046620	regulation of organ growth	13	0.0483837	FBgn0086384, FBgn0041604, FBgn0004583, FBgn0011676, FBgn0005198, FBgn0020386, FBgn0001075, FBgn0004644, FBgn0003944, FBgn0021796, FBgn0026317, FBgn0053193, FBgn0015806	0.321788
GO:0070302	regulation of stress-activated protein kinase signaling pathway	13	0.0483837	FBgn0003053, FBgn0028546, FBgn0044323, FBgn0259212, FBgn0015286, FBgn0000117, FBgn0004647, FBgn0040281, FBgn0010303, FBgn0039338, FBgn0041100, FBgn0024326, FBgn0086378	0.321788
GO:0000271	polysaccharide biosynthetic process	10	0.0485665	FBgn0033087, FBgn0011754, FBgn0034618, FBgn0051915, FBgn0020245, FBgn0030662, FBgn0034081, FBgn0015360, FBgn0033315, FBgn0038293	0.322147
GO:0007416	synaptogenesis	10	0.0485665	FBgn0041203, FBgn0011676, FBgn0026192, FBgn0039213, FBgn0001125, FBgn0028734, FBgn0086676, FBgn0000163, FBgn0004595, FBgn0003371	0.322147
GO:0007446	imaginal disc growth	10	0.0485665	FBgn0004644, FBgn0032475, FBgn0041191, FBgn0015907, FBgn0003659, FBgn0002413, FBgn0015544, FBgn0001075, FBgn0004647, FBgn0003612	0.322147
GO:0007616	long-term memory	10	0.0485665	FBgn0014467, FBgn0023479, FBgn0038934, FBgn0000721, FBgn0086370, FBgn0061469, FBgn0003165, FBgn0004647, FBgn0003321, FBgn0000536	0.322147
GO:0050896	response to stimulus	295	0.0488427	FBgn0033039, FBgn0001179, FBgn0250876, FBgn0027538, FBgn0032840, FBgn0038704, FBgn0003165, FBgn0003435, FBgn0027914, FBgn0022160, FBgn0002413, FBgn0010303, FBgn0032698, FBgn0037544, FBgn0031693, FBgn0034155, FBgn0030766, FBgn0037141, FBgn0001168, FBgn0025697, FBgn0022355, FBgn0259108, FBgn0013759, FBgn0044323, FBgn0034976, FBgn0003429, FBgn0022942, FBgn0004698, FBgn0039164, FBgn0010109, FBgn00034…	0.323022
GO:0007431	salivary gland development	42	0.0492188	FBgn0028360, FBgn0010389, FBgn0015239, FBgn0001250, FBgn0025469, FBgn0003339, FBgn0024250, FBgn0027932, FBgn0024252, FBgn0085432, FBgn0002121, FBgn0037270, FBgn0000320, FBgn0001168, FBgn0025697, FBgn0000210, FBgn0010435, FBgn0037700, FBgn0005634, FBgn0039532, FBgn0001085, FBgn0004396, FBgn0035107, FBgn0003507, FBgn0015795, FBgn0003502, FBgn0001180, FBgn0087035, FBgn0013948, FBgn0004197, FBgn00047…	0.324444
GO:0035272	exocrine system development	42	0.0492188	FBgn0028360, FBgn0010389, FBgn0015239, FBgn0001250, FBgn0025469, FBgn0003339, FBgn0024250, FBgn0027932, FBgn0024252, FBgn0085432, FBgn0002121, FBgn0037270, FBgn0000320, FBgn0001168, FBgn0025697, FBgn0000210, FBgn0010435, FBgn0037700, FBgn0005634, FBgn0039532, FBgn0001085, FBgn0004396, FBgn0035107, FBgn0003507, FBgn0015795, FBgn0003502, FBgn0001180, FBgn0087035, FBgn0013948, FBgn0004197, FBgn00047…	0.324444
GO:0006338	chromatin remodeling	17	0.0494046	FBgn0027835, FBgn0000541, FBgn0010520, FBgn0040078, FBgn0027620, FBgn0038576, FBgn0016687, FBgn0028734, FBgn0002887, FBgn0000139, FBgn0020306, FBgn0027378, FBgn0033636, FBgn0031873, FBgn0030093, FBgn0043002, FBgn0000212, FBgn0040071	0.32481
GO:0043473	pigmentation	22	0.0497942	FBgn0000179, FBgn0000257, FBgn0025697, FBgn0003210, FBgn0000422, FBgn0000247, FBgn0001087, FBgn0002567, FBgn0002566, FBgn0000482, FBgn0003515, FBgn0002937, FBgn0004644, FBgn0003008, FBgn0004034, FBgn0011758, FBgn0021764, FBgn0086679, FBgn0000527, FBgn0000330, FBgn0005626, FBgn0085408	0.326292
