# Supplementary material for: Sociogenomics of Cooperation and Conflict during Colony Founding in the Fire Ant Solenopsis invicta
Source: PLoS Genet. 2013 Aug 8;9(8):e1003633. doi: 10.1371/journal.pgen.1003633 (PMC3738511; doi:10.1371/journal.pgen.1003633)
Supplement: Table S4 — Experiment 1, k-means clustering, cluster 1 (genes upregulated in haplo): significantly enriched GO terms (Functional Annotation Clustering, medium stringency, P<0.05). (XLSX) [file pgen.1003633.s011.xlsx]

## Sheet: Supp Tbl 4
Experiment 1, k-means clustering, cluster 1 (genes upregulated in haplo): significantly enriched GO terms (Functional Annotation Clustering, medium stringency, P<0.05)
GO_term	Biological_function	Genes	PValue	flybase	Benjamini
GO:0009987	cellular process	1037	2.719e-57	FBgn0029504, FBgn0029502, FBgn0035945, FBgn0028665, FBgn0013343, FBgn0033179, FBgn0027783, FBgn0035558, FBgn0023508, FBgn0052626, FBgn0032698, FBgn0038601, FBgn0029789, FBgn0034697, FBgn0034410, FBgn0035954, FBgn0243513, FBgn0243516, FBgn0243514, FBgn0035956, FBgn0029906, FBgn0036534, FBgn0027296, FBgn0052113, FBgn0002174, FBgn0003423, FBgn0033160, FBgn0023519, FBgn0029798, FBgn0023512, FBgn00011…	7.38481e-54
GO:0033036	macromolecule localization	153	1.02991e-18	FBgn0038808, FBgn0013749, FBgn0259791, FBgn0013343, FBgn0041161, FBgn0027605, FBgn0083968, FBgn0041789, FBgn0031090, FBgn0029789, FBgn0030669, FBgn0033378, FBgn0024227, FBgn0020497, FBgn0011823, FBgn0035165, FBgn0013756, FBgn0000146, FBgn0052113, FBgn0014877, FBgn0015925, FBgn0011232, FBgn0000330, FBgn0032397, FBgn0036805, FBgn0000257, FBgn0030089, FBgn0000256, FBgn0024921, FBgn0031534, FBgn00001…	3.49655e-16
GO:0065007	biological regulation	508	2.63182e-13	FBgn0029504, FBgn0033846, FBgn0020224, FBgn0013343, FBgn0001079, FBgn0023508, FBgn0032698, FBgn0034410, FBgn0243513, FBgn0035954, FBgn0243516, FBgn0033029, FBgn0035956, FBgn0029094, FBgn0004828, FBgn0036534, FBgn0052758, FBgn0029798, FBgn0004179, FBgn0023172, FBgn0001169, FBgn0033544, FBgn0026562, FBgn0000063, FBgn0028546, FBgn0015239, FBgn0003145, FBgn0011291, FBgn0011290, FBgn0020306, FBgn00203…	4.46839e-11
GO:0016192	vesicle-mediated transport	113	9.7646e-13	FBgn0029504, FBgn0013749, FBgn0013746, FBgn0013343, FBgn0029088, FBgn0010300, FBgn0083963, FBgn0027605, FBgn0038049, FBgn0031090, FBgn0028471, FBgn0042085, FBgn0034155, FBgn0051064, FBgn0243513, FBgn0044323, FBgn0035060, FBgn0243514, FBgn0052113, FBgn0039212, FBgn0011232, FBgn0004179, FBgn0000330, FBgn0000257, FBgn0030089, FBgn0015024, FBgn0024921, FBgn0029878, FBgn0036179, FBgn0028741, FBgn00867…	1.32601e-10
GO:0044238	primary metabolic process	665	1.06101e-10	FBgn0033842, FBgn0029502, FBgn0033846, FBgn0062449, FBgn0028665, FBgn0052099, FBgn0020224, FBgn0001079, FBgn0039175, FBgn0035558, FBgn0052626, FBgn0032698, FBgn0038601, FBgn0029789, FBgn0032596, FBgn0034410, FBgn0033029, FBgn0029906, FBgn0029094, FBgn0036534, FBgn0027296, FBgn0039164, FBgn0003178, FBgn0086134, FBgn0035811, FBgn0002174, FBgn0003423, FBgn0033160, FBgn0023519, FBgn0039360, FBgn00231…	1.0673e-08
GO:0006461	protein complex assembly	58	3.84482e-10	FBgn0031454, FBgn0003887, FBgn0024909, FBgn0003687, FBgn0022936, FBgn0035805, FBgn0031456, FBgn0011836, FBgn0032195, FBgn0010341, FBgn0036581, FBgn0010280, FBgn0260639, FBgn0003884, FBgn0031450, FBgn0001337, FBgn0029117, FBgn0020497, FBgn0037202, FBgn0038578, FBgn0011823, FBgn0035754, FBgn0032154, FBgn0033929, FBgn0051390, FBgn0039213, FBgn0042177, FBgn0038746, FBgn0031781, FBgn0031873, FBgn00158…	3.36856e-08
GO:0006396	RNA processing	86	8.74303e-09	FBgn0033842, FBgn0040235, FBgn0031493, FBgn0005649, FBgn0031492, FBgn0036733, FBgn0039977, FBgn0035692, FBgn0052533, FBgn0029148, FBgn0032515, FBgn0031628, FBgn0260771, FBgn0011638, FBgn0028474, FBgn0035136, FBgn0033378, FBgn0004556, FBgn0011666, FBgn0035253, FBgn0043799, FBgn0026722, FBgn0034065, FBgn0038576, FBgn0011824, FBgn0036266, FBgn0022942, FBgn0037708, FBgn0000662, FBgn0003321, FBgn00402…	5.79172e-07
GO:0051726	regulation of cell cycle	51	4.25241e-07	FBgn0031696, FBgn0025781, FBgn0024689, FBgn0000404, FBgn0031399, FBgn0031107, FBgn0010300, FBgn0035640, FBgn0026317, FBgn0032698, FBgn0023444, FBgn0010382, FBgn0003884, FBgn0027053, FBgn0027375, FBgn0002791, FBgn0001624, FBgn0005198, FBgn0003525, FBgn0029094, FBgn0011763, FBgn0003268, FBgn0003139, FBgn0053193, FBgn0000996, FBgn0000063, FBgn0000114, FBgn0004643, FBgn0020309, FBgn0041147, FBgn00279…	1.92491e-05
GO:0051276	chromosome organization	75	4.20002e-07	FBgn0000404, FBgn0034314, FBgn0040232, FBgn0025682, FBgn0000405, FBgn0052438, FBgn0003475, FBgn0000139, FBgn0003612, FBgn0027783, FBgn0015391, FBgn0027378, FBgn0014127, FBgn0053822, FBgn0034410, FBgn0039067, FBgn0024227, FBgn0013717, FBgn0040078, FBgn0015546, FBgn0038576, FBgn0016687, FBgn0029094, FBgn0000146, FBgn0004828, FBgn0014340, FBgn0016685, FBgn0003268, FBgn0030054, FBgn0040283, FBgn00318…	1.93342e-05
GO:0043687	post-translational protein modification	119	2.5862e-06	FBgn0031696, FBgn0013749, FBgn0010288, FBgn0010389, FBgn0038588, FBgn0035601, FBgn0062449, FBgn0052099, FBgn0001079, FBgn0027609, FBgn0002413, FBgn0029006, FBgn0010303, FBgn0260935, FBgn0034410, FBgn0024227, FBgn0024846, FBgn0029113, FBgn0039623, FBgn0030863, FBgn0032210, FBgn0041174, FBgn0083976, FBgn0015925, FBgn0031873, FBgn0033544, FBgn0000063, FBgn0261112, FBgn0014006, FBgn0013435, FBgn00002…	9.62163e-05
GO:0007067	mitosis	42	2.99536e-05	FBgn0030500, FBgn0025781, FBgn0026433, FBgn0000404, FBgn0040233, FBgn0040232, FBgn0003732, FBgn0014029, FBgn0000405, FBgn0011207, FBgn0002878, FBgn0052438, FBgn0021825, FBgn0259791, FBgn0004643, FBgn0035640, FBgn0027783, FBgn0015391, FBgn0041147, FBgn0259876, FBgn0032698, FBgn0061476, FBgn0014127, FBgn0015270, FBgn0004374, FBgn0004379, FBgn0004889, FBgn0034231, FBgn0004378, FBgn0024227, FBgn00027…	0.000903537
GO:0016567	protein ubiquitination	18	5.28763e-05	FBgn0032467, FBgn0030809, FBgn0025638, FBgn0031107, FBgn0086694, FBgn0086442, FBgn0027609, FBgn0041174, FBgn0027936, FBgn0029006, FBgn0041100, FBgn0259174, FBgn0035136, FBgn0000173, FBgn0030600, FBgn0034410, FBgn0003410, FBgn0044020	0.00143513
GO:0051235	maintenance of location	19	7.63867e-05	FBgn0260442, FBgn0024227, FBgn0027508, FBgn0000057, FBgn0000405, FBgn0021760, FBgn0000117, FBgn0000146, FBgn0011692, FBgn0043884, FBgn0086356, FBgn0000667, FBgn0011747, FBgn0041789, FBgn0010215, FBgn0010341, FBgn0004379, FBgn0040080, FBgn0010247	0.00203199
GO:0050793	regulation of developmental process	73	8.35756e-05	FBgn0041604, FBgn0010389, FBgn0000404, FBgn0013343, FBgn0027609, FBgn0026192, FBgn0041161, FBgn0010300, FBgn0024252, FBgn0011771, FBgn0026317, FBgn0010303, FBgn0010341, FBgn0010382, FBgn0032859, FBgn0000382, FBgn0033378, FBgn0011666, FBgn0002791, FBgn0001624, FBgn0243516, FBgn0016700, FBgn0035060, FBgn0000384, FBgn0000146, FBgn0004828, FBgn0029157, FBgn0025455, FBgn0000568, FBgn0053193, FBgn00231…	0.00218032
GO:0030036	actin cytoskeleton organization	40	9.37331e-05	FBgn0000256, FBgn0001139, FBgn0023081, FBgn0003475, FBgn0025641, FBgn0013726, FBgn0024273, FBgn0011692, FBgn0011771, FBgn0027605, FBgn0003317, FBgn0010303, FBgn0010341, FBgn0001965, FBgn0002121, FBgn0012051, FBgn0032859, FBgn0037028, FBgn0015790, FBgn0044826, FBgn0052138, FBgn0243516, FBgn0039532, FBgn0016700, FBgn0003447, FBgn0004638, FBgn0001105, FBgn0021814, FBgn0029157, FBgn0003502, FBgn00156…	0.00239892
GO:0051640	organelle localization	27	9.74547e-05	FBgn0000063, FBgn0030500, FBgn0040232, FBgn0003732, FBgn0000405, FBgn0023542, FBgn0021825, FBgn0003514, FBgn0013726, FBgn0027103, FBgn0013997, FBgn0033107, FBgn0002525, FBgn0026479, FBgn0004379, FBgn0019968, FBgn0040080, FBgn0033378, FBgn0015754, FBgn0001316, FBgn0001624, FBgn0021760, FBgn0029157, FBgn0003654, FBgn0087035, FBgn0010909, FBgn0000163	0.00247077
GO:0043484	regulation of RNA splicing	23	0.000145712	FBgn0004237, FBgn0017457, FBgn0016978, FBgn0005649, FBgn0039977, FBgn0031456, FBgn0039229, FBgn0014189, FBgn0029094, FBgn0067622, FBgn0000114, FBgn0000662, FBgn0040286, FBgn0032240, FBgn0086895, FBgn0036828, FBgn0020306, FBgn0037344, FBgn0015907, FBgn0004838, FBgn0028474, FBgn0000330, FBgn0259220, FBgn0010247	0.00359157
GO:0006120	mitochondrial electron transport, NADH to ubiquinone	15	0.000194084	FBgn0031436, FBgn0032511, FBgn0035046, FBgn0030853, FBgn0047038, FBgn0033961, FBgn0040705, FBgn0017567, FBgn0039689, FBgn0031228, FBgn0029868, FBgn0031505, FBgn0025839, FBgn0011455, FBgn0030718	0.00465448
GO:0048519	negative regulation of biological process	123	0.000198407	FBgn0031696, FBgn0038808, FBgn0013746, FBgn0033846, FBgn0038872, FBgn0020224, FBgn0032515, FBgn0024491, FBgn0027885, FBgn0010300, FBgn0002525, FBgn0002413, FBgn0032698, FBgn0002791, FBgn0259784, FBgn0022942, FBgn0000146, FBgn0036534, FBgn0031488, FBgn0039559, FBgn0001169, FBgn0000063, FBgn0028546, FBgn0015286, FBgn0015024, FBgn0085450, FBgn0011207, FBgn0000117, FBgn0000114, FBgn0028990, FBgn00867…	0.00471627
GO:0048488	synaptic vesicle endocytosis	15	0.000279347	FBgn0030089, FBgn0013749, FBgn0003210, FBgn0028582, FBgn0004242, FBgn0035060, FBgn0039132, FBgn0003008, FBgn0053094, FBgn0037218, FBgn0004179, FBgn0000330, FBgn0026479, FBgn0086676, FBgn0027363	0.00620047
GO:0048518	positive regulation of biological process	77	0.000309201	FBgn0041604, FBgn0010389, FBgn0003687, FBgn0032840, FBgn0011836, FBgn0000139, FBgn0034650, FBgn0040273, FBgn0027609, FBgn0037647, FBgn0038046, FBgn0021796, FBgn0024252, FBgn0002413, FBgn0032698, FBgn0010280, FBgn0042085, FBgn0028974, FBgn0010382, FBgn0027053, FBgn0037874, FBgn0086378, FBgn0044323, FBgn0013753, FBgn0038578, FBgn0013717, FBgn0026323, FBgn0000146, FBgn0000439, FBgn0005410, FBgn00117…	0.00680536
GO:0007269	neurotransmitter secretion	30	0.000335734	FBgn0030089, FBgn0013749, FBgn0031454, FBgn0028582, FBgn0039132, FBgn0013343, FBgn0027103, FBgn0003008, FBgn0013997, FBgn0250789, FBgn0039774, FBgn0002121, FBgn0250788, FBgn0026378, FBgn0031450, FBgn0004574, FBgn0027505, FBgn0035060, FBgn0004242, FBgn0033876, FBgn0034913, FBgn0028734, FBgn0040285, FBgn0015614, FBgn0039212, FBgn0053094, FBgn0259246, FBgn0004179, FBgn0000330, FBgn0027363	0.00704489
GO:0043038	amino acid activation	18	0.0003619	FBgn0051739, FBgn0039153, FBgn0034401, FBgn0035064, FBgn0010803, FBgn0039175, FBgn0027090, FBgn0002069, FBgn0027085, FBgn0030007, FBgn0027084, FBgn0053123, FBgn0027086, FBgn0027088, FBgn0036629, FBgn0028962, FBgn0027079, FBgn0036763	0.00747649
GO:0051322	anaphase	9	0.000595408	FBgn0004643, FBgn0002791, FBgn0025781, FBgn0026181, FBgn0041147, FBgn0040233, FBgn0052831, FBgn0000405, FBgn0004889, FBgn0034231	0.0117379
GO:0003006	reproductive developmental process	103	0.000716464	FBgn0010389, FBgn0033846, FBgn0027538, FBgn0020224, FBgn0026206, FBgn0001079, FBgn0041161, FBgn0002525, FBgn0010303, FBgn0010382, FBgn0033378, FBgn0011823, FBgn0000146, FBgn0002926, FBgn0003654, FBgn0015925, FBgn0011230, FBgn0011232, FBgn0046687, FBgn0023172, FBgn0039559, FBgn0086655, FBgn0000256, FBgn0004606, FBgn0011207, FBgn0000117, FBgn0261397, FBgn0000114, FBgn0086895, FBgn0005390, FBgn00102…	0.0135204
GO:0042254	ribosome biogenesis	21	0.000743917	FBgn0004556, FBgn0053505, FBgn0033485, FBgn0011824, FBgn0034915, FBgn0030704, FBgn0038146, FBgn0023542, FBgn0035831, FBgn0032818, FBgn0029148, FBgn0259937, FBgn0036514, FBgn0029714, FBgn0038746, FBgn0036964, FBgn0037778, FBgn0032408, FBgn0039627, FBgn0003062, FBgn0037073	0.0137487
GO:0009056	catabolic process	101	0.000749964	FBgn0010288, FBgn0034366, FBgn0027914, FBgn0029006, FBgn0032596, FBgn0037873, FBgn0034410, FBgn0032296, FBgn0002791, FBgn0261268, FBgn0029113, FBgn0030863, FBgn0032210, FBgn0036534, FBgn0003178, FBgn0086134, FBgn0035811, FBgn0030969, FBgn0032216, FBgn0041174, FBgn0039214, FBgn0003423, FBgn0032214, FBgn0023174, FBgn0028325, FBgn0023511, FBgn0023477, FBgn0261112, FBgn0015024, FBgn0025638, FBgn00362…	0.0137661
GO:0007040	lysosome organization	13	0.000758744	FBgn0000257, FBgn0038808, FBgn0003210, FBgn0010638, FBgn0001087, FBgn0014411, FBgn0010803, FBgn0011509, FBgn0003008, FBgn0027085, FBgn0021906, FBgn0000330, FBgn0026479	0.0138327
GO:0006277	DNA amplification	10	0.000820598	FBgn0034430, FBgn0033846, FBgn0015799, FBgn0015270, FBgn0000307, FBgn0033081, FBgn0010382, FBgn0086695, FBgn0000996, FBgn0011763	0.0147545
GO:0016265	death	41	0.000829086	FBgn0033988, FBgn0014006, FBgn0028360, FBgn0034366, FBgn0015239, FBgn0000117, FBgn0036237, FBgn0013726, FBgn0027609, FBgn0015331, FBgn0027932, FBgn0027885, FBgn0024252, FBgn0038928, FBgn0033935, FBgn0002121, FBgn0037270, FBgn0035136, FBgn0003882, FBgn0086378, FBgn0000210, FBgn0037700, FBgn0026323, FBgn0035107, FBgn0015795, FBgn0087035, FBgn0038965, FBgn0011763, FBgn0011704, FBgn0038961, FBgn00107…	0.014808
GO:0009966	regulation of signal transduction	65	0.000984492	FBgn0041604, FBgn0001139, FBgn0039110, FBgn0020224, FBgn0050115, FBgn0003612, FBgn0027057, FBgn0024250, FBgn0040005, FBgn0026317, FBgn0010303, FBgn0023444, FBgn0033714, FBgn0031450, FBgn0086378, FBgn0024846, FBgn0044323, FBgn0040078, FBgn0005198, FBgn0031304, FBgn0025836, FBgn0023172, FBgn0261261, FBgn0024326, FBgn0001169, FBgn0027363, FBgn0028546, FBgn0033349, FBgn0028582, FBgn0015286, FBgn00150…	0.0172214
GO:0016197	endosome transport	11	0.00144077	FBgn0000257, FBgn0053635, FBgn0013749, FBgn0021796, FBgn0001087, FBgn0011232, FBgn0021814, FBgn0015795, FBgn0086676, FBgn0028741, FBgn0031450	0.0223813
GO:0010608	posttranscriptional regulation of gene expression	33	0.00145284	FBgn0038808, FBgn0013746, FBgn0038234, FBgn0000114, FBgn0032515, FBgn0001079, FBgn0027057, FBgn0016070, FBgn0010300, FBgn0027055, FBgn0042085, FBgn0027053, FBgn0004872, FBgn0015754, FBgn0011666, FBgn0038100, FBgn0027835, FBgn0026722, FBgn0028734, FBgn0022942, FBgn0036534, FBgn0000146, FBgn0019990, FBgn0087035, FBgn0024183, FBgn0037327, FBgn0027619, FBgn0004838, FBgn0039016, FBgn0031488, FBgn00288…	0.0224386
GO:0050657	nucleic acid transport	20	0.00160523	FBgn0033378, FBgn0020497, FBgn0034939, FBgn0036184, FBgn0030674, FBgn0026634, FBgn0031456, FBgn0033316, FBgn0014189, FBgn0015795, FBgn0003321, FBgn0087035, FBgn0038950, FBgn0039004, FBgn0015277, FBgn0039016, FBgn0034794, FBgn0003891, FBgn0028974, FBgn0001404	0.0243501
GO:0022008	neurogenesis	98	0.00311086	FBgn0041604, FBgn0010389, FBgn0014163, FBgn0000137, FBgn0033179, FBgn0010300, FBgn0010303, FBgn0010280, FBgn0010894, FBgn0010382, FBgn0044323, FBgn0261268, FBgn0023489, FBgn0035754, FBgn0029094, FBgn0003654, FBgn0011230, FBgn0023172, FBgn0086655, FBgn0035357, FBgn0004606, FBgn0085450, FBgn0020388, FBgn0000117, FBgn0261397, FBgn0036239, FBgn0024273, FBgn0013997, FBgn0086356, FBgn0002121, FBgn00027…	0.0414287
GO:0016573	histone acetylation	8	0.0035431	FBgn0020306, FBgn0040078, FBgn0020388, FBgn0027378, FBgn0031759, FBgn0031873, FBgn0039067, FBgn0014340	0.0461565
GO:0006725	cellular aromatic compound metabolic process	23	0.00373033	FBgn0000257, FBgn0003210, FBgn0086450, FBgn0000247, FBgn0001087, FBgn0037697, FBgn0000316, FBgn0005278, FBgn0000447, FBgn0032054, FBgn0003515, FBgn0003189, FBgn0037513, FBgn0010222, FBgn0003008, FBgn0019948, FBgn0037942, FBgn0052626, FBgn0016013, FBgn0004087, FBgn0000330, FBgn0031824, FBgn0003257	0.047629
GO:0034728	nucleosome organization	15	0.00372413	FBgn0000541, FBgn0040078, FBgn0027620, FBgn0016687, FBgn0029094, FBgn0004828, FBgn0053808, FBgn0002887, FBgn0016685, FBgn0020306, FBgn0030054, FBgn0015268, FBgn0027378, FBgn0053822, FBgn0031873, FBgn0043002	0.0477758
GO:0007349	cellularization	26	0.0037208	FBgn0000351, FBgn0027538, FBgn0014029, FBgn0261397, FBgn0003514, FBgn0013343, FBgn0013726, FBgn0024252, FBgn0038928, FBgn0010341, FBgn0011710, FBgn0015790, FBgn0004872, FBgn0011823, FBgn0021814, FBgn0028734, FBgn0000146, FBgn0011241, FBgn0003502, FBgn0003654, FBgn0087035, FBgn0011230, FBgn0039016, FBgn0011232, FBgn0023172, FBgn0000546	0.04796
GO:0022603	regulation of anatomical structure morphogenesis	38	0.0038507	FBgn0014006, FBgn0010389, FBgn0000117, FBgn0027609, FBgn0026192, FBgn0024252, FBgn0011771, FBgn0250789, FBgn0010341, FBgn0001965, FBgn0002121, FBgn0030749, FBgn0010382, FBgn0032859, FBgn0003410, FBgn0000382, FBgn0037028, FBgn0243516, FBgn0016700, FBgn0039532, FBgn0000384, FBgn0004638, FBgn0028734, FBgn0004828, FBgn0029157, FBgn0015794, FBgn0027587, FBgn0086361, FBgn0004837, FBgn0025455, FBgn00139…	0.0489012
GO:0050821	protein stabilization	7	0.00457563	FBgn0027057, FBgn0027055, FBgn0013746, FBgn0028836, FBgn0042085, FBgn0028837, FBgn0027053	0.0557843
GO:0009894	regulation of catabolic process	9	0.00580817	FBgn0038808, FBgn0010638, FBgn0028695, FBgn0028692, FBgn0026479, FBgn0261396, FBgn0011509, FBgn0027053, FBgn0003612	0.0673226
GO:0051960	regulation of nervous system development	24	0.00588533	FBgn0000382, FBgn0002791, FBgn0016700, FBgn0035060, FBgn0028734, FBgn0029157, FBgn0086361, FBgn0024273, FBgn0010300, FBgn0026181, FBgn0003317, FBgn0021764, FBgn0250789, FBgn0010341, FBgn0000097, FBgn0053193, FBgn0002121, FBgn0023172, FBgn0259174, FBgn0250788, FBgn0086676, FBgn0005536, FBgn0030600, FBgn0003410	0.0676134
GO:0040011	locomotion	53	0.00627478	FBgn0010389, FBgn0033846, FBgn0020224, FBgn0029088, FBgn0026192, FBgn0010341, FBgn0010303, FBgn0035136, FBgn0027053, FBgn0031450, FBgn0000382, FBgn0029117, FBgn0013717, FBgn0011823, FBgn0003423, FBgn0004179, FBgn0046687, FBgn0000182, FBgn0086655, FBgn0027363, FBgn0004606, FBgn0000221, FBgn0015477, FBgn0003514, FBgn0020245, FBgn0036372, FBgn0011020, FBgn0001297, FBgn0030600, FBgn0023423, FBgn00196…	0.0707462
GO:0007254	JNK cascade	11	0.0072442	FBgn0044323, FBgn0039532, FBgn0010341, FBgn0010303, FBgn0000097, FBgn0026323, FBgn0004638, FBgn0001297, FBgn0010909, FBgn0024326, FBgn0003502	0.0793017
GO:0009066	aspartate family amino acid metabolic process	7	0.00743166	FBgn0052068, FBgn0037305, FBgn0001125, FBgn0052281, FBgn0041607, FBgn0031824, FBgn0001124	0.0809508
GO:0008340	determination of adult life span	24	0.00893991	FBgn0002774, FBgn0000257, FBgn0003210, FBgn0036191, FBgn0034366, FBgn0033846, FBgn0001087, FBgn0005198, FBgn0003502, FBgn0010213, FBgn0052672, FBgn0037802, FBgn0021796, FBgn0026317, FBgn0040294, FBgn0010303, FBgn0015806, FBgn0000330, FBgn0038197, FBgn0037873, FBgn0034521, FBgn0035132, FBgn0000546, FBgn0023511	0.092952
GO:0031396	regulation of protein ubiquitination	6	0.00976787	FBgn0000351, FBgn0000257, FBgn0043458, FBgn0003210, FBgn0052672, FBgn0038286	0.100013
GO:0032535	regulation of cellular component size	25	0.00991525	FBgn0023081, FBgn0086706, FBgn0037647, FBgn0021796, FBgn0011771, FBgn0026317, FBgn0250789, FBgn0002413, FBgn0010303, FBgn0250788, FBgn0032859, FBgn0037874, FBgn0002774, FBgn0039532, FBgn0001085, FBgn0011787, FBgn0005198, FBgn0021814, FBgn0010315, FBgn0029157, FBgn0003502, FBgn0011230, FBgn0038206, FBgn0015806, FBgn0038197	0.101072
GO:0018195	peptidyl-arginine modification	4	0.0119097	FBgn0037770, FBgn0015925, FBgn0034817, FBgn0037834	0.115967
GO:0019856	pyrimidine base biosynthetic process	4	0.0119097	FBgn0086450, FBgn0000447, FBgn0003189, FBgn0003257	0.115967
GO:0034453	microtubule anchoring	4	0.0119097	FBgn0024227, FBgn0000405, FBgn0021760, FBgn0004379	0.115967
GO:0046530	photoreceptor cell differentiation	30	0.0129727	FBgn0000117, FBgn0003310, FBgn0261397, FBgn0013726, FBgn0033179, FBgn0043884, FBgn0086911, FBgn0040294, FBgn0001965, FBgn0001297, FBgn0000173, FBgn0027053, FBgn0003410, FBgn0000382, FBgn0015790, FBgn0001316, FBgn0000210, FBgn0044323, FBgn0023489, FBgn0001085, FBgn0004638, FBgn0021818, FBgn0003654, FBgn0015778, FBgn0000097, FBgn0010909, FBgn0053193, FBgn0010269, FBgn0000546, FBgn0259220	0.123517
GO:0035075	response to ecdysone	9	0.0149489	FBgn0000210, FBgn0037770, FBgn0015925, FBgn0000568, FBgn0000541, FBgn0016687, FBgn0002121, FBgn0030486, FBgn0000546	0.137756
GO:0017145	stem cell division	15	0.0152361	FBgn0051232, FBgn0004872, FBgn0011666, FBgn0000404, FBgn0011207, FBgn0000117, FBgn0001105, FBgn0000146, FBgn0000114, FBgn0003317, FBgn0039016, FBgn0000163, FBgn0000536, FBgn0040080, FBgn0020278	0.138828
GO:0006950	response to stress	90	0.0162742	FBgn0011676, FBgn0034314, FBgn0034366, FBgn0031399, FBgn0038704, FBgn0033273, FBgn0050467, FBgn0029891, FBgn0027914, FBgn0024252, FBgn0026869, FBgn0010303, FBgn0010341, FBgn0032698, FBgn0015553, FBgn0027378, FBgn0037544, FBgn0037873, FBgn0027375, FBgn0003882, FBgn0044419, FBgn0035132, FBgn0037141, FBgn0034939, FBgn0024846, FBgn0044323, FBgn0037202, FBgn0015546, FBgn0037301, FBgn0031589, FBgn00263…	0.146175
GO:0006790	sulfur metabolic process	12	0.0165353	FBgn0052068, FBgn0030882, FBgn0020245, FBgn0037942, FBgn0034081, FBgn0037305, FBgn0000565, FBgn0052281, FBgn0033315, FBgn0038755, FBgn0005278, FBgn0036762	0.147872
GO:0016333	morphogenesis of follicular epithelium	10	0.0173838	FBgn0000382, FBgn0001624, FBgn0000221, FBgn0002121, FBgn0020224, FBgn0067864, FBgn0023423, FBgn0001404, FBgn0020278, FBgn0011763	0.152429
GO:0009791	post-embryonic development	82	0.0182664	FBgn0041604, FBgn0010389, FBgn0034366, FBgn0020224, FBgn0000139, FBgn0082585, FBgn0024250, FBgn0024252, FBgn0002413, FBgn0010303, FBgn0010341, FBgn0261238, FBgn0029117, FBgn0024846, FBgn0037700, FBgn0001624, FBgn0261268, FBgn0034876, FBgn0003175, FBgn0026323, FBgn0016687, FBgn0000289, FBgn0005410, FBgn0000568, FBgn0015925, FBgn0036974, FBgn0000565, FBgn0015544, FBgn0002031, FBgn0001123, FBgn00304…	0.158074
GO:0009101	glycoprotein biosynthetic process	17	0.0208168	FBgn0037743, FBgn0000221, FBgn0011336, FBgn0029906, FBgn0033315, FBgn0051849, FBgn0038755, FBgn0014868, FBgn0066114, FBgn0035558, FBgn0020245, FBgn0034081, FBgn0030327, FBgn0034277, FBgn0040373, FBgn0034521, FBgn0003292	0.175002
GO:0007043	cell-cell junction assembly	10	0.0219466	FBgn0013997, FBgn0026192, FBgn0001624, FBgn0004167, FBgn0002121, FBgn0000117, FBgn0067864, FBgn0010894, FBgn0000163, FBgn0020278	0.182008
GO:0051325	interphase	9	0.025077	FBgn0000404, FBgn0015618, FBgn0015799, FBgn0000405, FBgn0001297, FBgn0003525, FBgn0010382, FBgn0086695, FBgn0259676	0.201817
GO:0009129	pyrimidine nucleoside monophosphate metabolic process	4	0.026464	FBgn0022338, FBgn0086450, FBgn0000447, FBgn0034261	0.210621
GO:0051261	protein depolymerization	4	0.026464	FBgn0039213, FBgn0038206, FBgn0037218, FBgn0004179	0.210621
GO:0060281	regulation of oocyte development	9	0.0316069	FBgn0015790, FBgn0033378, FBgn0004574, FBgn0041161, FBgn0004838, FBgn0004242, FBgn0000146, FBgn0013343, FBgn0261014	0.239249
GO:0048599	oocyte development	28	0.0317667	FBgn0000256, FBgn0026433, FBgn0003475, FBgn0026192, FBgn0041161, FBgn0011771, FBgn0250789, FBgn0040294, FBgn0002121, FBgn0027053, FBgn0033378, FBgn0015790, FBgn0015754, FBgn0003721, FBgn0045862, FBgn0021760, FBgn0015797, FBgn0028734, FBgn0000146, FBgn0002926, FBgn0004838, FBgn0015925, FBgn0026181, FBgn0026238, FBgn0003891, FBgn0000163, FBgn0041775, FBgn0001404	0.239664
GO:0048583	regulation of response to stimulus	24	0.0324444	FBgn0014467, FBgn0028546, FBgn0024846, FBgn0044323, FBgn0032840, FBgn0015286, FBgn0026323, FBgn0000117, FBgn0005198, FBgn0011764, FBgn0028990, FBgn0026317, FBgn0038928, FBgn0010303, FBgn0041100, FBgn0039338, FBgn0029798, FBgn0035141, FBgn0038197, FBgn0024326, FBgn0001404, FBgn0035976, FBgn0086378, FBgn0010247	0.242854
GO:0006112	energy reserve metabolic process	5	0.0336852	FBgn0011754, FBgn0031995, FBgn0038293, FBgn0038197, FBgn0030087	0.247688
GO:0016051	carbohydrate biosynthetic process	15	0.0334345	FBgn0001970, FBgn0037743, FBgn0051915, FBgn0029906, FBgn0033315, FBgn0038293, FBgn0032618, FBgn0035375, FBgn0033087, FBgn0011754, FBgn0003067, FBgn0034081, FBgn0020245, FBgn0034794, FBgn0025885	0.248034
GO:0006487	protein amino acid N-linked glycosylation	6	0.0338543	FBgn0037743, FBgn0034277, FBgn0029906, FBgn0051849, FBgn0014868, FBgn0034521	0.248125
GO:0007098	centrosome cycle	11	0.0345073	FBgn0015754, FBgn0020497, FBgn0039206, FBgn0002924, FBgn0033718, FBgn0011020, FBgn0035489, FBgn0003525, FBgn0039731, FBgn0004379, FBgn0004378	0.251004
GO:0001754	eye photoreceptor cell differentiation	26	0.0354578	FBgn0003310, FBgn0261397, FBgn0013726, FBgn0033179, FBgn0043884, FBgn0086911, FBgn0040294, FBgn0001965, FBgn0001297, FBgn0027053, FBgn0003410, FBgn0015790, FBgn0000382, FBgn0001316, FBgn0000210, FBgn0044323, FBgn0023489, FBgn0001085, FBgn0004638, FBgn0021818, FBgn0003654, FBgn0015778, FBgn0000097, FBgn0053193, FBgn0010269, FBgn0259220	0.256384
GO:0009119	ribonucleoside metabolic process	8	0.0363802	FBgn0035632, FBgn0036000, FBgn0086450, FBgn0001205, FBgn0031321, FBgn0005278, FBgn0026602, FBgn0000447	0.26085
GO:0048585	negative regulation of response to stimulus	8	0.0363802	FBgn0028546, FBgn0026317, FBgn0015286, FBgn0041100, FBgn0005198, FBgn0038197, FBgn0011764, FBgn0028990	0.26085
GO:0002520	immune system development	15	0.038433	FBgn0004606, FBgn0010389, FBgn0000541, FBgn0039532, FBgn0011823, FBgn0003447, FBgn0003507, FBgn0003612, FBgn0004197, FBgn0020306, FBgn0004837, FBgn0010341, FBgn0010269, FBgn0000212, FBgn0003882	0.270152
GO:0007005	mitochondrion organization	18	0.038917	FBgn0010438, FBgn0261276, FBgn0035805, FBgn0036928, FBgn0011787, FBgn0010315, FBgn0032154, FBgn0029891, FBgn0014877, FBgn0027360, FBgn0083968, FBgn0041100, FBgn0026479, FBgn0037778, FBgn0016041, FBgn0032397, FBgn0027358, FBgn0030669	0.272415
GO:0051240	positive regulation of multicellular organismal process	9	0.0392085	FBgn0021796, FBgn0032840, FBgn0250789, FBgn0000097, FBgn0015806, FBgn0250788, FBgn0086779, FBgn0037874, FBgn0086361	0.272816
GO:0051186	cofactor metabolic process	24	0.0395624	FBgn0023477, FBgn0030882, FBgn0035632, FBgn0029502, FBgn0036271, FBgn0001098, FBgn0000316, FBgn0031589, FBgn0030239, FBgn0033972, FBgn0032054, FBgn0039156, FBgn0030460, FBgn0010222, FBgn0050410, FBgn0033428, FBgn0037942, FBgn0001205, FBgn0004087, FBgn0021944, FBgn0031912, FBgn0037873, FBgn0037891, FBgn0036762	0.274264
GO:0030703	eggshell formation	22	0.0398756	FBgn0015754, FBgn0000256, FBgn0033846, FBgn0003475, FBgn0000307, FBgn0000146, FBgn0002926, FBgn0011763, FBgn0034430, FBgn0004650, FBgn0003317, FBgn0005390, FBgn0015799, FBgn0026238, FBgn0026170, FBgn0010341, FBgn0010303, FBgn0015270, FBgn0033081, FBgn0010382, FBgn0023423, FBgn0000996	0.27546
GO:0060341	regulation of cellular localization	17	0.0406222	FBgn0015790, FBgn0010391, FBgn0033378, FBgn0004574, FBgn0004242, FBgn0033876, FBgn0000146, FBgn0013343, FBgn0261014, FBgn0011692, FBgn0015614, FBgn0041161, FBgn0004838, FBgn0005355, FBgn0002413, FBgn0045073, FBgn0023423	0.277855
GO:0009888	tissue development	81	0.040459	FBgn0033988, FBgn0010389, FBgn0036029, FBgn0027538, FBgn0034366, FBgn0020224, FBgn0026192, FBgn0011771, FBgn0024252, FBgn0002525, FBgn0002413, FBgn0010303, FBgn0010341, FBgn0014127, FBgn0010894, FBgn0034155, FBgn0000382, FBgn0037700, FBgn0001624, FBgn0044323, FBgn0000384, FBgn0026323, FBgn0003525, FBgn0011763, FBgn0015778, FBgn0086347, FBgn0000568, FBgn0039213, FBgn0036974, FBgn0000565, FBgn00011…	0.278252
GO:0032271	regulation of protein polymerization	7	0.0414584	FBgn0250789, FBgn0023081, FBgn0038206, FBgn0250788, FBgn0032859, FBgn0029157, FBgn0003502	0.28141
GO:0007417	central nervous system development	41	0.0413431	FBgn0000259, FBgn0004606, FBgn0010389, FBgn0000137, FBgn0032515, FBgn0013997, FBgn0036514, FBgn0010300, FBgn0024252, FBgn0005427, FBgn0011771, FBgn0002525, FBgn0250789, FBgn0025800, FBgn0031500, FBgn0001297, FBgn0026179, FBgn0010894, FBgn0000536, FBgn0000382, FBgn0005630, FBgn0000210, FBgn0015754, FBgn0001624, FBgn0003300, FBgn0028734, FBgn0029157, FBgn0000439, FBgn0034181, FBgn0032059, FBgn00039…	0.281418
GO:0007179	transforming growth factor beta receptor signaling pathway	8	0.0457565	FBgn0051232, FBgn0024250, FBgn0024846, FBgn0003317, FBgn0025800, FBgn0010341, FBgn0029006, FBgn0002121	0.300455
GO:0008299	isoprenoid biosynthetic process	6	0.0463402	FBgn0019662, FBgn0037044, FBgn0030683, FBgn0061360, FBgn0051005, FBgn0001205	0.303006
GO:0008610	lipid biosynthetic process	26	0.0465802	FBgn0035265, FBgn0001941, FBgn0037743, FBgn0051915, FBgn0000221, FBgn0052699, FBgn0086448, FBgn0052380, FBgn0010328, FBgn0033883, FBgn0030670, FBgn0000536, FBgn0034270, FBgn0019662, FBgn0037044, FBgn0030683, FBgn0061360, FBgn0030035, FBgn0030465, FBgn0034142, FBgn0051005, FBgn0039360, FBgn0001205, FBgn0025885, FBgn0030485, FBgn0001404	0.303634
GO:0030097	hemopoiesis	12	0.0479446	FBgn0020306, FBgn0004197, FBgn0004837, FBgn0000541, FBgn0039532, FBgn0010341, FBgn0003447, FBgn0003507, FBgn0010269, FBgn0003882, FBgn0000212, FBgn0003612	0.309731
GO:0042981	regulation of apoptosis	22	0.048671	FBgn0259784, FBgn0036237, FBgn0013726, FBgn0000439, FBgn0086706, FBgn0011763, FBgn0029891, FBgn0027609, FBgn0011704, FBgn0027885, FBgn0024252, FBgn0015247, FBgn0002413, FBgn0000097, FBgn0039338, FBgn0011710, FBgn0053193, FBgn0035136, FBgn0010382, FBgn0086676, FBgn0023423, FBgn0000546	0.312978
