# Supplementary material for: Sociogenomics of Cooperation and Conflict during Colony Founding in the Fire Ant Solenopsis invicta
Source: PLoS Genet. 2013 Aug 8;9(8):e1003633. doi: 10.1371/journal.pgen.1003633 (PMC3738511; doi:10.1371/journal.pgen.1003633)
Supplement: Table S7 — Comparative studies: GO terms encompassing significantly downregulated genes that were in common between experiment 1 and old Drosophila in Zhan et al. [47]. (XLSX) [file pgen.1003633.s014.xlsx]

## Sheet: Supp Tbl 7
Comparative studies: GO terms encompassing significantly downregulated genes that were in common between Experiment 1 and old Drosophila in Zhan et al. 2007
	GO term	Biological function
GUT	GO:0043065	positive regulation of apoptotic process
	GO:0043067	regulation of programmed cell death
	GO:0043068	positive regulation of programmed cell death
	GO:0006120	mitochondrial electron transport, NADH to ubiquinone
	GO:0006260	DNA replication
	GO:0006352	DNA-dependent transcription, initiation
	GO:0006367	transcription initiation from RNA polymerase II promoter
	GO:0006399	tRNA metabolic process
	GO:0006725	cellular aromatic compound metabolic process
	GO:0007005	mitochondrion organization
	GO:0007015	actin filament organization
	GO:0007017	microtubule-based process
	GO:0007018	microtubule-based movement
	GO:0007033	vacuole organization
	GO:0007040	lysosome organization
	GO:0007268	synaptic transmission
	GO:0007269	neurotransmitter secretion
	GO:0007307	eggshell chorion gene amplification
	GO:0008033	tRNA processing
	GO:0012502	induction of programmed cell death
	GO:0015980	energy derivation by oxidation of organic compounds
	GO:0040008	regulation of growth
	GO:0042773	ATP synthesis coupled electron transport
	GO:0042775	mitochondrial ATP synthesis coupled electron transport
	GO:0044264	cellular polysaccharide metabolic process
	GO:0048193	Golgi vesicle transport
	GO:0048489	synaptic vesicle transport
	GO:0048518	positive regulation of biological process
	GO:0048522	positive regulation of cellular process
	GO:0051128	regulation of cellular component organization
	GO:0051186	cofactor metabolic process
	GO:0051246	regulation of protein metabolic process
FAT BODIES	GO:0043065	positive regulation of apoptotic process
	GO:0043068	positive regulation of programmed cell death
	GO:0000165	MAPK cascade
	GO:0000902	cell morphogenesis
	GO:0006457	protein folding
	GO:0006511	ubiquitin-dependent protein catabolic process
	GO:0006807	nitrogen compound metabolic process
	GO:0007224	smoothened signaling pathway
	GO:0007243	intracellular protein kinase cascade
	GO:0007254	JNK cascade
	GO:0009894	regulation of catabolic process
	GO:0009966	regulation of signal transduction
	GO:0009968	negative regulation of signal transduction
	GO:0012502	induction of programmed cell death
	GO:0019941	modification-dependent protein catabolic process
	GO:0031098	stress-activated protein kinase signaling cascade
	GO:0040008	regulation of growth
	GO:0042127	regulation of cell proliferation
	GO:0048518	positive regulation of biological process
	GO:0048519	negative regulation of biological process
	GO:0048522	positive regulation of cellular process
	GO:0048523	negative regulation of cellular process
	GO:0051246	regulation of protein metabolic process
BRAIN	GO:0000087	M phase of mitotic cell cycle
	GO:0000226	microtubule cytoskeleton organization
	GO:0000278	mitotic cell cycle
	GO:0006413	translational initiation
	GO:0006605	protein targeting
	GO:0007017	microtubule-based process
	GO:0007059	chromosome segregation
	GO:0007067	mitosis
	GO:0007224	smoothened signaling pathway
	GO:0008105	asymmetric protein localization
	GO:0016071	mRNA metabolic process
	GO:0050790	regulation of catalytic activity
	GO:0051128	regulation of cellular component organization
MUSCLE	GO:0000165	MAPK cascade
	GO:0006120	mitochondrial electron transport, NADH to ubiquinone
	GO:0007243	intracellular protein kinase cascade
	GO:0007254	JNK cascade
	GO:0009894	regulation of catabolic process
	GO:0015980	energy derivation by oxidation of organic compounds
	GO:0031098	stress-activated protein kinase signaling cascade
	GO:0042773	ATP synthesis coupled electron transport
	GO:0042775	mitochondrial ATP synthesis coupled electron transport
	GO:0044264	cellular polysaccharide metabolic process
	GO:0051186	cofactor metabolic process
MALPIGHIAN TUBULES	GO:0006333	chromatin assembly or disassembly
	GO:0006725	cellular aromatic compound metabolic process
	GO:0007265	Ras protein signal transduction
	GO:0016477	cell migration
	GO:0044272	sulfur compound biosynthetic process
	GO:0048193	Golgi vesicle transport
	GO:0048489	synaptic vesicle transport
ACCESSORY GLANDS	GO:0007317	regulation of pole plasm oskar mRNA localization
	GO:0009100	glycoprotein metabolic process
	GO:0009101	glycoprotein biosynthetic process
	GO:0044272	sulfur compound biosynthetic process
	GO:0046903	secretion
	GO:0051235	maintenance of location
