# Supplementary material for: Sociogenomics of Cooperation and Conflict during Colony Founding in the Fire Ant Solenopsis invicta
Source: PLoS Genet. 2013 Aug 8;9(8):e1003633. doi: 10.1371/journal.pgen.1003633 (PMC3738511; doi:10.1371/journal.pgen.1003633)
Supplement: Table S12 — Experiment 2: significantly enriched GO terms (Functional Annotation Clustering, medium stringency, P<0.05). (XLSX) [file pgen.1003633.s019.xlsx]

## Sheet: Supp Tbl 12
Experiment 2: significantly enriched GO terms (Functional Annotation Clustering, medium stringency, P<0.05)
GO_term	Biological_function	Count	Flybase	Dmel_ortholog	PValue	Benjamini
GO:0044237	cellular metabolic process	176	FBgn0001942, FBgn0013749, FBgn0038588, FBgn0039635, FBgn0034364, FBgn0028665, FBgn0052533, FBgn0010803, FBgn0032847, FBgn0039175, FBgn0032698, FBgn0037544, FBgn0015834, FBgn0036020, FBgn0259680, FBgn0002791, FBgn0024846, FBgn0037249, FBgn0015546, FBgn0010100, FBgn0004896, FBgn0044510, FBgn0022942, FBgn0029711, FBgn0003651, FBgn0030969, FBgn0002174, FBgn0027619, FBgn0083976, FBgn0027085, FBgn00345…		1.63397e-05	0.00889265
GO:0042180	cellular ketone metabolic process	29	FBgn0032922, FBgn0039153, FBgn0039635, FBgn0034364, FBgn0010803, FBgn0039175, FBgn0037801, FBgn0030007, FBgn0040001, FBgn0086687, FBgn0051522, FBgn0037697, FBgn0035911, FBgn0003308, FBgn0010222, FBgn0034145, FBgn0021765, FBgn0034142, FBgn0027085, FBgn0038074, FBgn0027086, FBgn0037574, FBgn0261283, FBgn0001124, FBgn0003388, FBgn0028962, FBgn0036763, FBgn0028325, FBgn0036762		4.07768e-05	0.0165798
GO:0045185	maintenance of protein location	9	FBgn0043884, FBgn0086356, FBgn0027508, FBgn0000667, FBgn0011747, FBgn0041789, FBgn0021760, FBgn0040080, FBgn0010247		0.000131082	0.0420864
GO:0006996	organelle organization	63	FBgn0001942, FBgn0000404, FBgn0025682, FBgn0010803, FBgn0038774, FBgn0033179, FBgn0043884, FBgn0032698, FBgn0041789, FBgn0053822, FBgn0053556, FBgn0019968, FBgn0040080, FBgn0010438, FBgn0002791, FBgn0037249, FBgn0001624, FBgn0015546, FBgn0010333, FBgn0031050, FBgn0004828, FBgn0014340, FBgn0032154, FBgn0086906, FBgn0027085, FBgn0000667, FBgn0037551, FBgn0014010, FBgn0010247, FBgn0036173, FBgn00305…		0.000495566	0.0780765
GO:0009058	biosynthetic process	94	FBgn0001942, FBgn0036117, FBgn0032261, FBgn0026619, FBgn0003714, FBgn0028665, FBgn0027571, FBgn0010803, FBgn0032618, FBgn0032847, FBgn0039175, FBgn0003279, FBgn0040001, FBgn0032698, FBgn0260779, FBgn0015834, FBgn0051522, FBgn0010438, FBgn0037249, FBgn0004896, FBgn0261360, FBgn0044510, FBgn0029711, FBgn0003651, FBgn0032154, FBgn0259144, FBgn0033782, FBgn0027619, FBgn0027085, FBgn0036974, FBgn00270…		0.000553276	0.0674357
GO:0030010	establishment of cell polarity	6	FBgn0001624, FBgn0002121, FBgn0010333, FBgn0000163, FBgn0019968, FBgn0040080		0.00073928	0.0730023
GO:0006732	coenzyme metabolic process	12	FBgn0010222, FBgn0032922, FBgn0023477, FBgn0030882, FBgn0021765, FBgn0037942, FBgn0004057, FBgn0010100, FBgn0001205, FBgn0037574, FBgn0030239, FBgn0036762		0.00121372	0.110557
GO:0048102	autophagic cell death	10	FBGN0036974, FBGN0015239, FBGN0002121, FBGN0037270, FBGN0043364, FBGN0004432, FBGN0029176, FBGN0034894, FBGN0259220, FBGN0087035		0.00223313	0.13641
GO:0055072	iron ion homeostasis	4	FBgn0030449, FBgn0015222, FBgn0015221, FBgn0030092		0.00236262	0.138606
GO:0016335	morphogenesis of larval imaginal disc epithelium	4	FBgn0028992, FBgn0001624, FBgn0002121, FBgn0010333		0.00366136	0.181696
GO:0007010	cytoskeleton organization	33	FBgn0001942, FBgn0030500, FBgn0014189, FBgn0038774, FBgn0261014, FBgn0043884, FBgn0086356, FBgn0040294, FBgn0026170, FBgn0041789, FBgn0011020, FBgn0002121, FBgn0053556, FBgn0013325, FBgn0019968, FBgn0040080, FBgn0030086, FBgn0004378, FBgn0037028, FBgn0036825, FBgn0037249, FBgn0001624, FBgn0027508, FBgn0010265, FBgn0021760, FBgn0010333, FBgn0031050, FBgn0011741, FBgn0086906, FBgn0000667, FBgn00117…		0.00468687	0.202764
GO:0006629	lipid metabolic process	23	FBgn0037574	Coenzyme Q biosynthesis protein 2	0.0071623	0.255253
			FBgn0025373	Farnesyl pyrophosphate synthase
			FBgn0051915	Glycosyltransferase 25 family member
			FBgn0261283	Helix loop helix protein 106
			FBgn0001205	HMG Coenzyme A reductase
			FBgn0025885	Inositol-3-phosphate synthase
			FBgn0028841	juvenile hormone acid methyltransferase
			FBgn0034145	Putative fatty acyl-CoA reductase CG5065
			FBgn0034142	Putative fatty acyl-CoA reductase CG8306
			FBgn0030465	Putative inositol monophosphatase 3
			FBgn0250862	radish
			FBgn0003308	rosy
			FBgn0021765	scully
			FBgn0003388	shade
			FBgn0026619	Tafazzin homolog
			FBgn0031735	Dmel_CG11029
			FBgn0040001	Dmel_CG17374
			FBgn0066101	Dmel_CG31094
			FBgn0051522	Dmel_CG31522
			FBgn0086687	Dmel_CG5887
			FBgn0035914	Dmel_CG6282
			FBgn0034166	Dmel_CG6472
			FBgn0036939	Dmel_CG7365
GO:0045186	zonula adherens assembly	4	FBgn0001624, FBgn0004167, FBgn0002121, FBgn0000163		0.00980631	0.307406
GO:0051260	protein homooligomerization	3	FBgn0020370, FBgn0004378, FBgn0032154		0.0102609	0.313319
GO:0006733	oxidoreduction coenzyme metabolic process	5	FBgn0032922, FBgn0023477, FBgn0004057, FBgn0037574, FBgn0030239		0.0109108	0.318057
GO:0034330	cell junction organization	6	FBgn0003392, FBgn0001624, FBgn0004167, FBgn0002121, FBgn0010333, FBgn0000163		0.0173655	0.437065
GO:0043484	regulation of RNA splicing	8	FBgn0020306, FBgn0001942, FBgn0023441, FBgn0014189, FBgn0000662, FBgn0032240, FBgn0259220, FBgn0010247		0.021636	0.48537
GO:0035088	establishment or maintenance of apical/basal cell polarity	5	FBgn0001624, FBgn0002121, FBgn0014010, FBgn0000163, FBgn0028573		0.0230692	0.495159
GO:0006950	response to stress	30	FBgn0087035	Argonaute 2	0.0354907	0.598173
			FBgn0043364	cabut
			FBgn0034068	caspar
			FBgn0030449	Ferritin 3 heavy chain homologue
			FBgn0030092	frataxin homolog
			FBgn0035438	Glutathione peroxidase
			FBgn0001220	Heat shock protein cognate 5
			FBgn0029167	Hemolectin
			FBgn0027375	homolog of RecQ
			FBgn0024222	immune response deficient 5
			FBgn0024846	Mitogen-activated protein kinase 14B
			FBgn0043002	mutagen-sensitive 201
			FBgn0002989	okra
			FBgn0010247	Poly-(ADP-ribose) polymerase
			FBgn0032698	Protein TIPIN homolog
			FBgn0259728	radiation-resistant
			FBgn0010333	Ras-related protein Rac1
			FBgn0003392	shibere
			FBgn0015546	spellchecker1
			FBgn0004832	Xeroderma pigmentosum group A-like
			FBgn0032685	Dmel_CG10211
			FBgn0027562	Dmel_CG10345
			FBgn0034638	Dmel_CG10433
			FBgn0037544	Dmel_CG11035
			FBgn0037301	Dmel_CG12005
			FBgn0037263	Dmel_CG18271
			FBgn0014037	Dmel_CG32217
			FBgn0259233	Dmel_CG42331
			FBgn0030931	Dmel_CG6318
			FBgn0038570	Dmel_CG7217; Dmel_CG7215
GO:0007552	metamorphosis	24	FBgn0015527, FBgn0028992, FBgn0024846, FBgn0001624, FBgn0015239, FBgn0010333, FBgn0087035, FBgn0003382, FBgn0020307, FBgn0003345, FBgn0011695, FBgn0020309, FBgn0036974, FBgn0042641, FBgn0037270, FBgn0002121, FBgn0043364, FBgn0004432, FBgn0029176, FBgn0005536, FBgn0034894, FBgn0025879, FBgn0010247, FBgn0259220		0.0355024	0.592706
GO:0009117	nucleotide metabolic process	14	FBgn0023477, FBgn0027582, FBgn0028665, FBgn0030239, FBgn0261360, FBgn0028671, FBgn0013672, FBgn0011586, FBgn0016119, FBgn0004057, FBgn0034568, FBgn0001205, FBgn0036959, FBgn0036752		0.0487273	0.684589
